# Supplementary material
Source: PubMed Central journal article supplement (PMC4249650)
Supplement: NIHMS623924-supplement-1.pdf [file NIHMS623924-supplement-1.pdf]

Supplementary Table 1: Patient samples studied in this manuscript

| Tissue   | Sample     | Clinical       | Paired |        |         |        | H3K27me3 |  |
|----------|------------|----------------|--------|--------|---------|--------|----------|--|
|          |            |                | WES    | SNP6.0 | RNA-seq | IMPACT | IHC      |  |
| Frozen   | 2T         | RT-associated  | X      | X      | X       | X      | X        |  |
| Frozen   | 4T         | Sporadic       | X      | X      | X       | X      | X        |  |
| Frozen   | 5T         | NF1-associated |        |        | X       | X      | X        |  |
| Frozen   | 7T         | RT-associated  | X      | X      | X       | X      | X        |  |
| Frozen   | 8T         | Sporadic       | X      | X      | X       | X      | X        |  |
| Frozen   | 9T         | NF1-associated | X      | X      | X       | X      | X        |  |
| Frozen   | 10T        | Sporadic       | X      | X      | X       | X      | X        |  |
| Frozen   | 11T        | NF1-associated | X      | X      | X       | X      | X        |  |
| Frozen   | 12T        | NF1-associated | X      | X      | X       | X      | X        |  |
| Frozen   | 13T        | RT-associated  | X      | X      | X       | X      | X        |  |
| Frozen   | 14T        | NF1-associated | X      | X      | X       | X      | X        |  |
| Frozen   | 15T        | NF1-associated | X      | X      |         | X      | X        |  |
| Frozen   | 16T        | Sporadic       | X      | X      | X       | X      |          |  |
| Frozen   | 18T        | RT-associated  | X      | X      |         | X      | X        |  |
| Frozen   | 19T        | NF1-associated | X      | X      | X       | X      | X        |  |
| Frozen   | 20T        | Epithelioid    | X      | X      | X       | X      | X        |  |
| Frozen   | 21T        | Sporadic       |        |        | X       |        | X        |  |
| Frozen   | 22T=46.3   | NF1-associated |        |        | X       |        | X        |  |
| Paraffin | MPNST 01   | Sporadic       |        |        |         | X      | X        |  |
| Paraffin | MPNST 02.1 | Sporadic       |        |        |         | X      | X        |  |
| Paraffin | MPNST 02.2 | Sporadic       |        |        |         | X      | X        |  |
| Paraffin | MPNST 02.3 | Sporadic       |        |        |         | X      | X        |  |
| Paraffin | MPNST 03   | NF1-associated |        |        |         | X      | X        |  |
| Paraffin | MPNST 04.1 | NF1-associated |        |        |         | X      | X        |  |
| Paraffin | MPNST 04.2 | NF1-associated |        |        |         | X      | X        |  |
| Paraffin | MPNST 05.1 | NF1-associated |        |        |         | X      | X        |  |
| Paraffin | MPNST 05.2 | Neurofibroma   |        |        |         |        | X        |  |
| Paraffin | MPNST 06.1 | NF1-associated |        |        |         | X      | X        |  |
| Paraffin | MPNST 06.2 | NF1-associated |        |        |         | X      | X        |  |
| Paraffin | MPNST 10   | NF1-associated |        |        |         | X      | X        |  |
| Paraffin | MPNST 12.1 | NF1-associated |        |        |         | X      | X        |  |
| Paraffin | MPNST 12.2 | Neurofibroma   |        |        |         | X      | X        |  |
| Paraffin | MPNST 13.1 | NF1-associated |        |        |         | X      | X        |  |
| Paraffin | MPNST 13.2 | Neurofibroma   |        |        |         | X      | X        |  |
| Paraffin | MPNST 14   | NF1-associated |        |        |         | X      | X        |  |
| Paraffin | MPNST 18   | Sporadic       |        |        |         | X      | X        |  |
| Paraffin | MPNST 19   | NF1-associated |        |        |         | X      | X        |  |
| Paraffin | MPNST 21.1 | NF1-associated |        |        |         | X      | X        |  |
| Paraffin | MPNST 21.2 | Neurofibroma   |        |        |         | X      | X        |  |
| Paraffin | MPNST 22   | NF1-associated |        |        |         | X      | X        |  |
| Paraffin | MPNST 23   | Sporadic       |        |        |         | X      | X        |  |
| Paraffin | MPNST 24   | RT-associated  |        |        |         | X      | X        |  |
| Paraffin | MPNST 25   | NF1-associated |        |        |         | X      | X        |  |
| Paraffin | MPNST 26   | Epithelioid    |        |        |         | X      | X        |  |
| Paraffin | MPNST 27   | Sporadic       |        |        |         | X      | X        |  |
| Paraffin | MPNST 28   | NF1-associated |        |        |         | X      | X        |  |
| Paraffin | MPNST 29   | Sporadic       |        |        |         | X      | X        |  |
| Paraffin | MPNST 30   | Sporadic       |        |        |         |        | X        |  |
| Paraffin | MPNST 32   | NF1-associated |        |        |         |        | X        |  |
| Paraffin | MPNST 33   | NF1-associated |        |        |         |        | X        |  |

|          |            |                |   |   |
|----------|------------|----------------|---|---|
| Paraffin | MPNST 34   | Sporadic       |   | X |
| Paraffin | MPNST 36   | NF1-associated |   | X |
| Paraffin | MPNST 37.2 | NF1-associated |   | X |
| Paraffin | MPNST 37.3 | Neurofibroma   |   | X |
| Paraffin | MPNST 38.1 | Sporadic       |   | X |
| Paraffin | MPNST 38.2 | Sporadic       |   | X |
| Paraffin | MPNST 39   | RT-Associated  |   | X |
| Paraffin | MPNST 40.1 | NF1-associated |   | X |
| Paraffin | MPNST 40.2 | NF1-associated |   | X |
| Paraffin | MPNST 40.3 | NF1-associated |   | X |
| Paraffin | MPNST 43.1 | NF1-associated | X | X |
| Paraffin | MPNST 43.2 | Neurofibroma   | X | X |
| Paraffin | MPNST 44   | RT-Associated  | X | X |
| Paraffin | MPNST 45   | RT-Associated  | X | X |
| Paraffin | MPNST 46.1 | NF1-associated | X | X |
| Paraffin | MPNST 46.2 | Neurofibroma   | X | X |
| Paraffin | MPNST 46.3 | NF1-associated | X | X |
| Paraffin | MPNST 47.1 | NF1-associated | X | X |
| Paraffin | MPNST 47.2 | Neurofibroma   | X | X |
| Paraffin | MPNST 48   | Sporadic       | X | X |
| Paraffin | MPNST 50   | Epithelioid    | X | X |
| Paraffin | MPNST 51   | NF1-associated | X | X |
| Paraffin | MPNST 52   | RT-Associated  | X | X |
| Paraffin | MPNST 53   | RT-Associated  | X | X |
| Paraffin | MPNST 54   | RT-Associated  |   | X |
| Paraffin | MPNST 55   | RT-Associated  |   | X |

**Supplementary Table 2: Whole exome sequencing metrics**

| Sample | Total Somatic Mutations | Non-synonymous Somatic Mutations | Num Reads (10 <sup>6</sup> ) | Uniquely Aligned Reads (10 <sup>6</sup> ) | % Uniquely Aligned Reads | On Target Bases (10 <sup>9</sup> ) | % On or Near Bait | Mean Target Coverage | % Target Bases at 10x | % Target Bases at 20x |
|--------|-------------------------|----------------------------------|------------------------------|-------------------------------------------|--------------------------|------------------------------------|-------------------|----------------------|-----------------------|-----------------------|
| 2N     |                         |                                  | 258                          | 254                                       | 98.3%                    | 11.9                               | 81.1%             | 169                  | 99.2%                 | 98.0%                 |
| 2T     | 194                     | 26                               | 179                          | 176                                       | 98.3%                    | 8.3                                | 81.8%             | 117                  | 98.4%                 | 95.4%                 |
| 4N     |                         |                                  | 253                          | 247                                       | 97.8%                    | 11.1                               | 79.1%             | 158                  | 99.1%                 | 97.7%                 |
| 4T     | 296                     | 54                               | 259                          | 255                                       | 98.3%                    | 11.2                               | 77.5%             | 158                  | 99.1%                 | 97.7%                 |
| 7N     |                         |                                  | 196                          | 193                                       | 98.5%                    | 8.9                                | 80.9%             | 126                  | 98.4%                 | 96.1%                 |
| 7T     | 280                     | 49                               | 153                          | 151                                       | 98.6%                    | 6.9                                | 80.5%             | 98                   | 97.5%                 | 92.3%                 |
| 8N     |                         |                                  | 207                          | 204                                       | 98.5%                    | 10.1                               | 83.4%             | 143                  | 98.3%                 | 96.2%                 |
| 8T     | 223                     | 32                               | 190                          | 187                                       | 98.5%                    | 9.1                                | 82.4%             | 129                  | 97.4%                 | 94.0%                 |
| 9N     |                         |                                  | 273                          | 270                                       | 99.0%                    | 14.5                               | 88.9%             | 206                  | 98.9%                 | 97.8%                 |
| 9T     | 350                     | 56                               | 196                          | 194                                       | 99.1%                    | 10.5                               | 89.3%             | 149                  | 98.1%                 | 95.5%                 |
| 10N    |                         |                                  | 98                           | 97                                        | 98.7%                    | 5.3                                | 89.2%             | 75                   | 96.4%                 | 89.6%                 |
| 10T    | 126                     | 11                               | 145                          | 144                                       | 98.8%                    | 7.9                                | 89.6%             | 112                  | 97.8%                 | 94.1%                 |
| 11N    |                         |                                  | 158                          | 156                                       | 98.5%                    | 7.9                                | 86.2%             | 112                  | 97.6%                 | 94.3%                 |
| 11T    | 352                     | 60                               | 172                          | 167                                       | 97.3%                    | 6.9                                | 69.3%             | 98                   | 97.3%                 | 92.6%                 |
| 12N    |                         |                                  | 246                          | 242                                       | 98.6%                    | 12.6                               | 86.0%             | 178                  | 98.4%                 | 96.9%                 |
| 12T    | 303                     | 55                               | 283                          | 279                                       | 98.6%                    | 14.3                               | 86.5%             | 203                  | 98.6%                 | 97.2%                 |
| 13N    |                         |                                  | 155                          | 151                                       | 97.2%                    | 6.5                                | 71.0%             | 91                   | 97.8%                 | 93.0%                 |
| 13T    | 552                     | 55                               | 442                          | 433                                       | 98.0%                    | 19.9                               | 75.1%             | 282                  | 99.3%                 | 98.6%                 |
| 14N    |                         |                                  | 193                          | 188                                       | 97.7%                    | 8.2                                | 74.1%             | 116                  | 98.1%                 | 95.1%                 |
| 14T    | 617                     | 46                               | 487                          | 472                                       | 97.0%                    | 16.4                               | 59.9%             | 232                  | 98.3%                 | 96.9%                 |
| 15N    |                         |                                  | 140                          | 137                                       | 97.9%                    | 6.4                                | 79.3%             | 91                   | 97.5%                 | 92.5%                 |
| 15T    | 129                     | 20                               | 92                           | 90                                        | 97.6%                    | 4.0                                | 73.7%             | 57                   | 94.7%                 | 83.6%                 |
| 16N    |                         |                                  | 467                          | 458                                       | 98.0%                    | 21.5                               | 78.1%             | 305                  | 99.1%                 | 98.5%                 |
| 16T    | 637                     | 121                              | 231                          | 224                                       | 96.9%                    | 9.2                                | 69.0%             | 130                  | 98.8%                 | 96.6%                 |
| 18N    |                         |                                  | 238                          | 236                                       | 99.4%                    | 12.5                               | 90.1%             | 285                  | 61.7%                 | 61.3%                 |
| 18T    | 93                      | 13                               | 105                          | 103                                       | 98.3%                    | 4.8                                | 77.8%             | 68                   | 96.5%                 | 88.2%                 |
| 19N    |                         |                                  | 201                          | 198                                       | 98.3%                    | 9.9                                | 82.5%             | 140                  | 98.7%                 | 96.5%                 |
| 19T    | 284                     | 51                               | 315                          | 309                                       | 98.3%                    | 15.2                               | 81.5%             | 215                  | 99.2%                 | 98.2%                 |
| 20N    |                         |                                  | 132                          | 130                                       | 98.0%                    | 6.3                                | 78.9%             | 89                   | 97.0%                 | 91.1%                 |
| 20T    | 145                     | 1                                | 202                          | 196                                       | 97.2%                    | 7.6                                | 67.2%             | 108                  | 97.9%                 | 94.7%                 |

**Supplementary Table 3: Mutations found in WES of MPNST Samples**

| Sample | Hugo Symbol | Entrez Gene Id | Genomic Location          | Variant Classification | Variant Type | Reference Allele                                  | Tumor Seq Allele | Codon Change                           | Protein Change    |
|--------|-------------|----------------|---------------------------|------------------------|--------------|---------------------------------------------------|------------------|----------------------------------------|-------------------|
| 10T    | C1orf222    | 85452          | chr1:1871035-1871035      | Nonsense_Mutation      | SNP          | T                                                 | A                | Aag/Tag                                | K242*             |
| 10T    | MUTYH       | 4595           | chr1:45798142-45798142    | Missense_Mutation      | SNP          | C                                                 | T                | Ggc/Agc                                | G237S             |
| 10T    | ESPN        | 83715          | chr1:6500456-6500456      | Missense_Mutation      | SNP          | C                                                 | T                | Cac/Tac                                | H211Y             |
| 10T    | KCNC2       | 3747           | chr12:75444697-75444697   | Missense_Mutation      | SNP          | C                                                 | T                | cGc/cAc                                | R363H             |
| 10T    | CEP76       | 79959          | chr18:12702588-12702588   | De_novo_Start_InFrame  | SNP          | G                                                 | T                |                                        |                   |
| 10T    | TTN         | 7273           | chr2:179456148-179456148  | Missense_Mutation      | SNP          | T                                                 | C                | Ata/Gta                                | I20102V           |
| 10T    | OLIG1       | 116448         | chr21:34442697-34442697   | Missense_Mutation      | SNP          | A                                                 | T                | Acc/Tcc                                | T49S              |
| 10T    | CLIC6       | 54102          | chr21:36042475-36042475   | Missense_Mutation      | SNP          | G                                                 | A                | gGg/gAg                                | G263E             |
| 10T    | PRDM15      | 63977          | chr21:43243719-43243719   | Missense_Mutation      | SNP          | G                                                 | C                | tC/ttG                                 | F938L             |
| 10T    | CDC42EP1    | 11135          | chr22:37964409-37964429   | In_Frame_Del           | DEL          | AACCCTT                                           | -                | ccagcgctgctgc                          | PAPAANPS2         |
| 10T    | ATP8A1      | 10396          | chr4:42588376-42588376    | Missense_Mutation      | SNP          | C                                                 | G                | Gat/Cat                                | D238H             |
| 11T    | SPRR1B      | 6699           | chr1:153005002-153005007  | In_Frame_Del           | DEL          | GTTCCA                                            | -                | gttcca/-                               | VP61-             |
| 11T    | DARS2       | 55157          | chr1:173806106-173806106  | Frame_Shift_Del        | DEL          | G                                                 | -                | -                                      | -231              |
| 11T    | TRAF3IP3    | 80342          | chr1:209950815-209950815  | Missense_Mutation      | SNP          | A                                                 | C                | gAt/gCt                                | D391A             |
| 11T    | OSBPL9      | 114883         | chr1:52253415-52253415    | Missense_Mutation      | SNP          | T                                                 | C                | gTt/gCt                                | V740A             |
| 11T    | ERRF1       | 54206          | chr1:8074157-8074157      | Missense_Mutation      | SNP          | C                                                 | T                | Gac/Aac                                | D168N             |
| 11T    | KLHL17      | 339451         | chr1:897356-897356        | Missense_Mutation      | SNP          | C                                                 | G                | Cac/Gac                                | H214D             |
| 11T    | PFKFB3      | 5209           | chr10:6265961-6265961     | Frame_Shift_Del        | DEL          | G                                                 | -                | -                                      | -432              |
| 11T    | TM7SF2      | 7108           | chr11:64881060-64881060   | Frame_Shift_Del        | DEL          | C                                                 | -                | -                                      | -199              |
| 11T    | EED         | 8726           | chr11:85975217-85975217   | Frame_Shift_Del        | DEL          | A                                                 | -                | -                                      | -213              |
| 11T    | MTERFD3     | 80298          | chr12:107371874-107371874 | Frame_Shift_Del        | DEL          | C                                                 | -                | -                                      | -207              |
| 11T    | SIRT4       | 23409          | chr12:120741408-120741408 | Missense_Mutation      | SNP          | G                                                 | A                | cGt/cAt                                | R15H              |
| 11T    | HNF1A       | 6927           | chr12:121434510-121434510 | Missense_Mutation      | SNP          | C                                                 | T                | aCg/aTg                                | T425M             |
| 11T    | WDR66       | 144406         | chr12:122359379-122359381 | In_Frame_Del           | DEL          | AAC                                               | -                | aaaacg/aag                             | KT56K             |
| 11T    | WDR66       | 144406         | chr12:122359385-122359385 | Frame_Shift_Del        | DEL          | C                                                 | -                | -                                      | -58               |
| 11T    | KRT1        | 3848           | chr12:53069246-53069246   | Missense_Mutation      | SNP          | C                                                 | G                | Ggt/Cgt                                | G556R             |
| 11T    | PDE1B       | 5153           | chr12:54967267-54967267   | Splice_Site            | SNP          | G                                                 | A                |                                        |                   |
| 11T    | PDE1B       | 5153           | chr12:54969796-54969796   | Missense_Mutation      | SNP          | G                                                 | C                | Gag/Cag                                | E430Q             |
| 11T    | CARS2       | 79587          | chr13:111358304-111358304 | Missense_Mutation      | SNP          | G                                                 | A                | aCg/aTg                                | T46M              |
| 11T    | ARHGEF40    | 55701          | chr14:21542562-21542562   | Missense_Mutation      | SNP          | C                                                 | G                | Cgg/Ggg                                | R225G             |
| 11T    | GOLGA6L2    | 283685         | chr15:23685085-23685085   | Missense_Mutation      | SNP          | G                                                 | A                | gCg/gTg                                | A846V             |
| 11T    | PLA2G4B     | 8681           | chr15:42127323-42127323   | Frame_Shift_Del        | DEL          | T                                                 | -                | -                                      | -125              |
| 11T    | PLA2G4B     | 8681           | chr15:42127325-42127326   | Frame_Shift_Del        | DEL          | CT                                                | -                | -                                      | -126              |
| 11T    | TUBGCP4     | 27229          | chr15:43696699-43696706   | Frame_Shift_Del        | DEL          | TACGACTA                                          | -                | -                                      | -647              |
| 11T    | ABCA3       | 21             | chr16:2369671-2369671     | Frame_Shift_Del        | DEL          | G                                                 | -                | -                                      | -262              |
| 11T    | ASPHD1      | 253982         | chr16:29912801-29912802   | In_Frame_Ins           | INS          | -                                                 | GGG              | cag/caGGGg                             | Q170QG            |
| 11T    | CCL5        | 6352           | chr17:34205532-34205534   | In_Frame_Del           | DEL          | ACG                                               | -                | gtcgt/gtc                              | VV62V             |
| 11T    | UNC13D      | 201294         | chr17:73832993-73832993   | Nonsense_Mutation      | SNP          | C                                                 | T                | tgG/tgA                                | W354*             |
| 11T    | UBE2O       | 63893          | chr17:74387193-74387193   | Missense_Mutation      | SNP          | C                                                 | T                | cGg/cAg                                | R1237Q            |
| 11T    | ZNF233      | 353355         | chr19:44778125-44778125   | Missense_Mutation      | SNP          | A                                                 | T                | Aat/Tat                                | N438Y             |
| 11T    | MUC16       | 94025          | chr19:9057522-9057522     | Missense_Mutation      | SNP          | G                                                 | T                | aCa/aAa                                | T9975K            |
| 11T    | ZNF559      | 84527          | chr19:9453744-9453745     | Frame_Shift_Del        | DEL          | AA                                                | -                | -                                      | -539              |
| 11T    | TTN         | 7273           | chr2:179399992-179399992  | Missense_Mutation      | SNP          | C                                                 | T                | Gaa/Aaa                                | E33784K           |
| 11T    | FOSL2       | 2355           | chr2:28616101-28616101    | De_novo_Start_InFrame  | SNP          | A                                                 | T                |                                        |                   |
| 11T    | HAO         | 23498          | chr2:42994744-42994744    | Missense_Mutation      | SNP          | G                                                 | T                | gCt/gAt                                | A258D             |
| 11T    | SNPH        | 9751           | chr20:1281256-1281256     | Missense_Mutation      | SNP          | C                                                 | T                | cCg/cTg                                | P114L             |
| 11T    | CD96        | 10225          | chr3:111356997-111356997  | Missense_Mutation      | SNP          | A                                                 | G                | Aat/Gat                                | N503D             |
| 11T    | POLQ        | 10721          | chr3:121195490-121195490  | Missense_Mutation      | SNP          | C                                                 | T                | aGt/aAt                                | S2101N            |
| 11T    | GRM7        | 2917           | chr3:7620292-7620292      | Nonsense_Mutation      | SNP          | C                                                 | T                | Cag/Tag                                | Q567*             |
| 11T    | DSPP        | 1834           | chr4:88536014-88536031    | In_Frame_Del           | DEL          | ACAGCAG                                           | -                | agcagtgacagca                          | SSDSSN734-        |
| 11T    | PJA2        | 9867           | chr5:108714082-108714082  | Missense_Mutation      | SNP          | C                                                 | A                | gGa/gTa                                | G369V             |
| 11T    | PJA2        | 9867           | chr5:108714083-108714083  | Nonsense_Mutation      | SNP          | C                                                 | A                | Gga/Tga                                | G369*             |
| 11T    | DNAH5       | 1767           | chr5:13719087-13719087    | Missense_Mutation      | SNP          | G                                                 | A                | CaT/Tat                                | H4135Y            |
| 11T    | DNAH5       | 1767           | chr5:13721211-13721211    | Missense_Mutation      | SNP          | G                                                 | C                | atC/atG                                | I4059M            |
| 11T    | PCDHB12     | 56124          | chr5:140589497-140589497  | Missense_Mutation      | SNP          | G                                                 | T                | Gta/Tta                                | V340L             |
| 11T    | CPEB4       | 80315          | chr5:173380109-173380109  | Missense_Mutation      | SNP          | T                                                 | A                | aTa/aAa                                | I599K             |
| 11T    | CDHR2       | 54825          | chr5:175992356-175992356  | Translation_Start_Site | SNP          | G                                                 | A                | atG/atA                                | M11               |
| 11T    | CDHR2       | 54825          | chr5:175992357-175992357  | Missense_Mutation      | SNP          | G                                                 | T                | Gcc/Tcc                                | A2S               |
| 11T    | GCNT6       | NA             | chr6:10634846-10634846    | Frame_Shift_Del        | DEL          | C                                                 | -                | -                                      | -285              |
| 11T    | ZBTB12      | 221527         | chr6:31868632-31868655    | In_Frame_Del           | DEL          | TGGTGCC<br>GCTGATG<br>CTGCTCA<br>CAA              | -                | cttgtgacagcat<br>cagcgccaccaa<br>g/cag | LVSSISATK1<br>43Q |
| 11T    | SKIV2L      | 6499           | chr6:31935517-31935548    | Frame_Shift_Del        | DEL          | TATTCCACA<br>ACCCTGG<br>TCTTGTGT<br>GATAAGC<br>CC | -                | -                                      | -870              |

|     |               |           |                           |                        |     |          |         |                  |            |
|-----|---------------|-----------|---------------------------|------------------------|-----|----------|---------|------------------|------------|
| 11T | TMEM168       | 64418     | chr7:112407431-112407431  | Missense_Mutation      | SNP | A        | T       | Tgg/Agg          | W639R      |
| 11T | TAS2R3        | 50831     | chr7:141464244-141464244  | Missense_Mutation      | SNP | A        | T       | Agc/Tgc          | S96C       |
| 11T | AP521         | 9907      | chr7:4830340-4830340      | Missense_Mutation      | SNP | G        | A       | Gat/Aat          | D659N      |
| 11T | PEX1          | 5189      | chr7:92135583-92135584    | Frame_Shift_Ins        | INS | -        | T       | -/A              | -626?      |
| 11T | SPAG1         | 6674      | chr8:101253182-101253182  | Missense_Mutation      | SNP | T        | A       | Tcg/Acg          | S905T      |
| 11T | SLC52A2       | 79581     | chr8:145584258-145584259  | Frame_Shift_Ins        | INS | -        | AA      | -/AA             | -337?      |
| 11T | NKAIN3        | 286183    | chr8:63161649-63161649    | Missense_Mutation      | SNP | G        | A       | gGa/gAa          | G6E        |
| 11T | ADHFE1        | 137872    | chr8:67366364-67366364    | Missense_Mutation      | SNP | G        | A       | Ggc/Agc          | G320S      |
| 11T | SPAG8         | 26206     | chr9:35811497-35811498    | In_Frame_Ins           | INS | -        | CCAGGA  | gc               | G182VLG    |
| 11T | TGIF2LX       | 90316     | chrX:89177445-89177445    | Missense_Mutation      | SNP | A        | G       | Atc/Gtc          | I121V      |
| 12T | TRAF3IP3      | 80342     | chr1:209950815-209950815  | Missense_Mutation      | SNP | A        | C       | gAt/gCt          | D391A      |
| 12T | EFCAB2        | 84288     | chr1:245133630-245133630  | Missense_Mutation      | SNP | G        | C       | aGg/aCg          | R69T       |
| 12T | EFCAB2        | 84288     | chr1:245133631-245133631  | Missense_Mutation      | SNP | G        | T       | agG/agT          | R69S       |
| 12T | PTGFR         | 5737      | chr1:78958666-78958666    | Missense_Mutation      | SNP | G        | T       | Ggc/Tgc          | G80C       |
| 12T | ERRF1         | 54206     | chr1:8074157-8074157      | Missense_Mutation      | SNP | C        | T       | Gac/Aac          | D168N      |
| 12T | KLHL17        | 339451    | chr1:897356-897356        | Missense_Mutation      | SNP | C        | G       | Cac/Gac          | H214D      |
| 12T | PFKFB3        | 5209      | chr10:6265961-6265961     | Frame_Shift_Del        | DEL | G        | -       | -                | -432       |
| 12T | AMBRA1        | 55626     | chr11:46419062-46419062   | Missense_Mutation      | SNP | G        | C       | Ctg/Gtg          | L1279V     |
| 12T | TM7SF2        | 7108      | chr11:64881060-64881060   | Frame_Shift_Del        | DEL | C        | -       | -                | -199       |
| 12T | EED           | 8726      | chr11:85975217-85975217   | Frame_Shift_Del        | DEL | A        | -       | -                | -213       |
| 12T | MTERFD3       | 80298     | chr12:107371874-107371874 | Frame_Shift_Del        | DEL | C        | -       | -                | -207       |
| 12T | HNF1A         | 6927      | chr12:121434510-121434510 | Missense_Mutation      | SNP | C        | T       | aCg/aTg          | T425M      |
| 12T | PDE1B         | 5153      | chr12:54967267-54967267   | Splice_Site            | SNP | G        | A       | -                | -          |
| 12T | PDE1B         | 5153      | chr12:54969796-54969796   | Missense_Mutation      | SNP | G        | C       | Gag/Cag          | E430Q      |
| 12T | SARNP         | 84324     | chr12:56154387-56154387   | Missense_Mutation      | SNP | C        | T       | cGa/cAa          | R180Q      |
| 12T | GOLGA8I       | 283796    | chr15:23261850-23261850   | Missense_Mutation      | SNP | C        | A       | gCg/gAg          | A321E      |
| 12T | FSIP1         | 161835    | chr15:40034005-40034005   | Splice_Site            | SNP | C        | G       | -                | -          |
| 12T | JMJD7-PLA2G4B | 8681      | chr15:42127323-42127323   | Frame_Shift_Del        | DEL | T        | -       | -                | -125       |
| 12T | JMJD7-PLA2G4B | 8681      | chr15:42127325-42127326   | Frame_Shift_Del        | DEL | CT       | -       | -                | -126       |
| 12T | TUBGCP4       | 27229     | chr15:43696699-43696706   | Frame_Shift_Del        | DEL | TACGACTA | -       | -                | -647       |
| 12T | UNC13C        | 440279    | chr15:54307066-54307066   | Missense_Mutation      | SNP | C        | A       | Cca/Aca          | P656T      |
| 12T | ABCA3         | 21        | chr16:2369671-2369671     | Frame_Shift_Del        | DEL | G        | -       | -                | -262       |
| 12T | CENPBD1       | 92806     | chr16:90038189-90038189   | Missense_Mutation      | SNP | C        | G       | Gat/Cat          | D48H       |
| 12T | UBE2O         | 63893     | chr17:74387193-74387193   | Missense_Mutation      | SNP | C        | T       | cGg/cAg          | R1237Q     |
| 12T | MUC16         | 94025     | chr19:9057522-9057522     | Missense_Mutation      | SNP | G        | T       | aCa/aAa          | T9975K     |
| 12T | ZNF559        | 84527     | chr19:9453744-9453745     | Frame_Shift_Del        | DEL | AA       | -       | -                | -539       |
| 12T | TTN           | 7273      | chr2:179399992-179399992  | Missense_Mutation      | SNP | C        | T       | Gaa/Aaa          | E33784K    |
| 12T | FOSL2         | 2355      | chr2:28616101-28616101    | De_novo_Start_InFrame  | SNP | A        | T       | -                | -          |
| 12T | HAAO          | 23498     | chr2:42994744-42994744    | Missense_Mutation      | SNP | G        | T       | gCt/gAt          | A258D      |
| 12T | ANKRD36C      | 100996862 | chr2:96521367-96521367    | Missense_Mutation      | SNP | C        | G       | Gtg/Ctg          | V1548L     |
| 12T | SNPH          | 9751      | chr20:1281256-1281256     | Missense_Mutation      | SNP | C        | T       | cCg/cTg          | P114L      |
| 12T | DSCAM         | 1826      | chr21:41414529-41414529   | Missense_Mutation      | SNP | C        | T       | Gaa/Aaa          | E1819K     |
| 12T | CDC42EP1      | 11135     | chr22:37964409-37964429   | In_Frame_Del           | DEL | CAGCGCC  | TGCTGCA | ccagcgctgctgctgc | PAPAAANPS2 |
| 12T | CD96          | 10225     | chr3:111356997-111356997  | Missense_Mutation      | SNP | A        | G       | aaacccctca       | cca 53P    |
| 12T | POLQ          | 10721     | chr3:121195490-121195490  | Missense_Mutation      | SNP | C        | T       | Aat/Gat          | N503D      |
| 12T | PJA2          | 9867      | chr5:108714082-108714082  | Missense_Mutation      | SNP | C        | A       | aGt/aAt          | S2101N     |
| 12T | PJA2          | 9867      | chr5:108714083-108714083  | Missense_Mutation      | SNP | C        | A       | gGa/gTa          | G369V      |
| 12T | DNAH5         | 1767      | chr5:13719087-13719087    | Nonsense_Mutation      | SNP | C        | A       | Gga/Tga          | G369*      |
| 12T | DNAH5         | 1767      | chr5:13712111-13712111    | Missense_Mutation      | SNP | G        | A       | Cat/Tat          | H4135Y     |
| 12T | DNAH5         | 1767      | chr5:13721211-13721211    | Missense_Mutation      | SNP | G        | C       | atC/atG          | I4059M     |
| 12T | PCDHB12       | 56124     | chr5:140589497-140589497  | Missense_Mutation      | SNP | G        | T       | Gta/Tta          | V340L      |
| 12T | CPEB4         | 80315     | chr5:173380109-173380109  | Missense_Mutation      | SNP | T        | A       | aTa/aAa          | I599K      |
| 12T | CDHR2         | 54825     | chr5:175992356-175992356  | Translation_Start_Site | SNP | G        | A       | atG/atA          | M11        |
| 12T | CDHR2         | 54825     | chr5:175992357-175992357  | Missense_Mutation      | SNP | G        | T       | Gcc/Tcc          | A2S        |
| 12T | GCNT6         | NA        | chr6:10634846-10634846    | Frame_Shift_Del        | DEL | C        | -       | -                | -285       |
| 12T | TBP           | 6908      | chr6:170871022-170871023  | In_Frame_Ins           | INS | -        | CAG     | -/CAG            | -67Q       |
| 12T | ZBTB12        | 221527    | chr6:31868632-31868655    | In_Frame_Del           | DEL | TGGTGGC  | GCTGATG | cttgtgagcagcat   | LVSSISATK1 |
| 12T | SKIV2L        | 6499      | chr6:31935517-31935548    | In_Frame_Del           | DEL | CTGCTCA  | CAA     | cagcgccaccaa     | g/cag 43Q  |
| 12T | TMEM168       | 64418     | chr7:112407431-112407431  | Missense_Mutation      | SNP | A        | T       | IATTCACA         | -          |
| 12T | PEX1          | 5189      | chr7:92135583-92135584    | Frame_Shift_Ins        | INS | -        | T       | ACCCTGG          | -          |
| 12T | SPAG1         | 6674      | chr8:101253182-101253182  | Missense_Mutation      | SNP | T        | A       | TCTTGTGT         | -          |
| 12T | TNFRSF11B     | 4982      | chr8:119941069-119941069  | Missense_Mutation      | SNP | C        | G       | GATAAGC          | -          |
| 12T | SLC52A2       | 79581     | chr8:145584258-145584259  | Frame_Shift_Ins        | INS | -        | AA      | CC               | -          |
| 12T | NKAIN3        | 286183    | chr8:63161649-63161649    | Missense_Mutation      | SNP | G        | A       | -                | -870       |
| 12T | ADHFE1        | 137872    | chr8:67366364-67366364    | Missense_Mutation      | SNP | G        | A       | Tgg/Agg          | W639R      |
| 12T | TGIF2LX       | 90316     | chrX:89177445-89177445    | Missense_Mutation      | SNP | A        | G       | -/A              | -626?      |
| 13T | VAV3          | 10451     | chr1:108226137-108226137  | Missense_Mutation      | SNP | G        | C       | Tcg/Acg          | S905T      |
| 13T | LMX1A         | 4009      | chr1:165182890-165182890  | Missense_Mutation      | SNP | C        | A       | aGt/aCt          | S167T      |
| 13T | LMX1A         | 4009      | chr1:165182890-165182890  | Missense_Mutation      | SNP | G        | A       | -/AA             | -337?      |
| 13T | LMX1A         | 4009      | chr1:165182890-165182890  | Missense_Mutation      | SNP | G        | A       | gGa/gAa          | G6E        |
| 13T | LMX1A         | 4009      | chr1:165182890-165182890  | Missense_Mutation      | SNP | G        | A       | Ggc/Agc          | G320S      |
| 13T | LMX1A         | 4009      | chr1:165182890-165182890  | Missense_Mutation      | SNP | A        | G       | Atc/Gtc          | I121V      |
| 13T | LMX1A         | 4009      | chr1:165182890-165182890  | Missense_Mutation      | SNP | G        | C       | Cga/Gga          | R584G      |
| 13T | LMX1A         | 4009      | chr1:165182890-165182890  | Missense_Mutation      | SNP | C        | A       | aaG/aaT          | K219N      |

|     |            |           |                           |                      |     |        |         |               |           |
|-----|------------|-----------|---------------------------|----------------------|-----|--------|---------|---------------|-----------|
| 13T | ILDR2      | 387597    | chr1:166889959-166889959  | Missense_Mutation    | SNP | C      | A       | gaG/gaT       | E623D     |
| 13T | IKBKE      | 9641      | chr1:206651205-206651205  | Splice_Site          | SNP | G      | A       |               |           |
| 13T | CEP104     | 9731      | chr1:3755571-3755571      | Missense_Mutation    | SNP | A      | T       | gTg/gAg       | V283E     |
| 13T | LRP8       | 7804      | chr1:53724087-53724087    | Missense_Mutation    | SNP | G      | A       | Ct/Ttt        | L705F     |
| 13T | C1orf173   | 127254    | chr1:75038239-75038239    | Missense_Mutation    | SNP | T      | A       | aAg/aTg       | K1052M    |
| 13T | AP000936.5 | NA        | chr11:116988859-116988860 | Splice_Site          | INS | -      | TATA    |               |           |
| 13T | NAV2       | 89797     | chr11:19967974-19967974   | Missense_Mutation    | SNP | G      | A       | cGg/cAg       | R748Q     |
| 13T | TNKS1BP1   | 85456     | chr11:57077314-57077314   | Nonsense_Mutation    | SNP | C      | T       | tgG/tgA       | W957*     |
| 13T | CUX2       | 23316     | chr12:111746288-111746288 | Missense_Mutation    | SNP | C      | A       | Cag/Aag       | Q406K     |
| 13T | MED13L     | 23389     | chr12:116413375-116413375 | Missense_Mutation    | SNP | C      | G       | Gac/Cac       | D1845H    |
| 13T | MUC19      | 283463    | chr12:40830536-40830536   | Missense_Mutation    | SNP | G      | A       | Ggc/Agc       | G716S     |
|     |            |           |                           |                      |     |        | ACCTCCG |               |           |
|     |            |           |                           |                      |     |        | GAGCCGT | agcagctaccgct | SSYGSGG55 |
| 13T | KRT1       | 3848      | chr12:53069223-53069243   | In_Frame_Del         | DEL |        | AGCTGCT | ccggaggt/-    | 7-        |
| 13T | MBD6       | 114785    | chr12:57921973-57921973   | Missense_Mutation    | SNP | G      | T       | aGc/aTc       | S817I     |
| 13T | BRCA2      | 675       | chr13:32911052-32911052   | Missense_Mutation    | SNP | A      | G       | Aac/Gac       | N854D     |
| 13T | RB1        | 5925      | chr13:48955572-48955572   | Missense_Mutation    | SNP | G      | T       | tGg/tTg       | W563L     |
| 13T | VSX2       | 338917    | chr14:74706391-74706391   | Missense_Mutation    | SNP | G      | A       | Gag/Aag       | E43K      |
| 13T | TMEM63C    | 57156     | chr14:77715209-77715209   | Missense_Mutation    | SNP | C      | G       | Cct/Gct       | P622A     |
| 13T | UNC45A     | 55898     | chr15:91491122-91491122   | Splice_Site          | SNP | T      | G       |               |           |
| 13T | SCNN1G     | 6340      | chr16:23208725-23208725   | Missense_Mutation    | SNP | G      | A       | Gtc/Atc       | V352I     |
| 13T | VPS35      | 55737     | chr16:46694517-46694517   | Missense_Mutation    | SNP | T      | C       | gAc/gGc       | D753G     |
| 13T | FTSDJ1     | 55783     | chr16:71319676-71319677   | Frame_Shift_Ins      | INS | -      | GG      | -/CC          | -49?      |
| 13T | SDR42E1    | 93517     | chr16:82033098-82033098   | Missense_Mutation    | SNP | C      | T       | cGg/cAg       | R267Q     |
| 13T | KIAA0100   | 9703      | chr17:26971087-26971087   | Nonsense_Mutation    | SNP | G      | A       | Cag/Tag       | Q63*      |
| 13T | TEX3       | 7157      | chr17:7579334-7579335     | Frame_Shift_Ins      | INS | -      | T       | -/A           | -118?     |
| 13T | RPXO1      | 57455     | chr19:1828298-1828298     | Missense_Mutation    | SNP | C      | A       | Ggc/Tgc       | G164C     |
| 13T | SARS2      | 54938     | chr19:39412083-39412083   | Missense_Mutation    | SNP | C      | T       | Gtc/Atc       | V182I     |
| 13T | NMRK2      | 27231     | chr19:3942194-3942194     | Missense_Mutation    | SNP | G      | A       | Gcc/Acc       | A211T     |
| 13T | ZNF525     | NA        | chr19:53884865-53884865   | Missense_Mutation    | SNP | C      | T       | Cat/Tat       | H345Y     |
| 13T | SLC9A2     | 6549      | chr2:103318884-103318889  | In_Frame_Del         | DEL | ATAAGG | -       | ataagg/-      | IR590-    |
| 13T | SH3RF3     | 344558    | chr2:110053581-110053581  | Missense_Mutation    | SNP | G      | T       | Gcc/Tcc       | A603S     |
| 13T | TTN        | 7273      | chr2:179427755-179427755  | Nonsense_Mutation    | SNP | G      | A       | Cga/Tga       | R27702*   |
| 13T | NRG3       | 57446     | chr20:35335409-35335411   | Frame_Shift_Del      | DEL | TTC    | -       | -             | -20       |
|     |            |           |                           |                      |     |        | GCAGCAG | atgcagcagcag/ |           |
| 13T | NCOA3      | 8202      | chr20:46279815-46279823   | In_Frame_Del         | DEL | CA     | -       | atg           | MQQQ1247M |
| 13T | DSCAM      | 1826      | chr21:41550850-41550850   | Splice_Site          | SNP | G      | A       |               |           |
| 13T | SULT4A1    | 25830     | chr22:44229566-44229566   | Missense_Mutation    | SNP | C      | T       | cGc/cAc       | R186H     |
| 13T | HCLS1      | 3059      | chr3:121350829-121350829  | Missense_Mutation    | SNP | T      | A       | gAg/gTg       | E442V     |
| 13T | CPNE4      | 131034    | chr3:131415460-131415460  | Missense_Mutation    | SNP | C      | G       | Gtg/Ctg       | V163L     |
| 13T | SCN10A     | 6336      | chr3:38793894-38793894    | Missense_Mutation    | SNP | C      | T       | gGa/gAa       | G524E     |
| 13T | SPCS1      | 28972     | chr3:52741747-52741749    | In_Frame_Del         | DEL | GTG    | -       | aagtggaag     | KW143K    |
| 13T | ANK2       | 287       | chr4:114276553-114276553  | Missense_Mutation    | SNP | A      | T       | gAa/gTa       | E2260V    |
| 13T | GPR125     | 166647    | chr4:22414845-22414845    | Missense_Mutation    | SNP | G      | A       | aCg/aTg       | T731M     |
| 13T | RFC1       | 5981      | chr4:39329172-39329172    | Missense_Mutation    | SNP | T      | C       | aAg/aGg       | K179R     |
| 13T | KIF3A      | 11127     | chr5:132034881-132034881  | Missense_Mutation    | SNP | C      | T       | aGg/aAg       | R705K     |
| 13T | LARS       | 51520     | chr5:145522585-145522585  | Missense_Mutation    | SNP | T      | A       | aAg/aTg       | K647M     |
| 13T | ITK        | 3702      | chr5:156670752-156670752  | Missense_Mutation    | SNP | C      | T       | Cgg/Tgg       | R394W     |
| 13T | CDHR2      | 54825     | chr5:176016159-176016159  | Missense_Mutation    | SNP | C      | T       | gCc/gTc       | A995V     |
| 13T | LAMA4      | 3910      | chr6:112451163-112451163  | Missense_Mutation    | SNP | C      | T       | Gaa/Aaa       | E1350K    |
| 13T | TAGAP      | 117289    | chr6:159457809-159457809  | Missense_Mutation    | SNP | C      | T       | Gag/Aag       | E416K     |
| 13T | RXRB       | 6257      | chr6:33165677-33165677    | Missense_Mutation    | SNP | A      | T       | Ttc/Atc       | F228I     |
| 13T | SYNGAP1    | 8831      | chr6:33405694-33405694    | Missense_Mutation    | SNP | G      | T       | Gac/Tac       | D338Y     |
| 13T | RB1CC1     | 9821      | chr8:53596248-53596248    | Missense_Mutation    | SNP | T      | G       | gAa/gCa       | E77A      |
| 13T | SPTAN1     | 6709      | chr9:131345428-131345428  | Nonsense_Mutation    | SNP | C      | T       | Cga/Tga       | R627*     |
| 13T | PTCH1      | 5727      | chr9:98209530-98209530    | Missense_Mutation    | SNP | C      | A       | agG/agT       | R1336S    |
| 14T | FBXO44     | 93611     | chr1:11718599-11718599    | Missense_Mutation    | SNP | C      | G       | Caa/Gaa       | Q125E     |
| 14T | NBPF10     | 100132406 | chr1:145323666-145323666  | Missense_Mutation    | SNP | A      | G       | gAc/gGc       | D1168G    |
| 14T | ZNF687     | 57592     | chr1:151259941-151259941  | Missense_Mutation    | SNP | G      | A       | Gat/Aat       | D392N     |
| 14T | SLC27A3    | 11000     | chr1:153750707-153750707  | Missense_Mutation    | SNP | G      | A       | cGt/cAt       | R539H     |
| 14T | URB2       | 9816      | chr1:229771660-229771660  | Missense_Mutation    | SNP | G      | C       | Gcg/Ccg       | A434P     |
| 14T | RSPO1      | 284654    | chr1:38077349-38077350    | Splice_Site          | INS | -      | A       |               |           |
| 14T | CDCA8      | 55143     | chr1:38167456-38167456    | Missense_Mutation    | SNP | A      | T       | Act/Tct       | T152S     |
| 14T | EED        | 8726      | chr11:85977259-85977259   | Splice_Site          | SNP | G      | A       |               |           |
| 14T | PIK3C2G    | 5288      | chr12:18544101-18544101   | Missense_Mutation    | SNP | G      | A       | Gaa/Aaa       | E681K     |
| 14T | CAPRN2     | 65981     | chr12:30894022-30894022   | Nonsense_Mutation    | SNP | C      | A       | Gaa/Taa       | E168*     |
| 14T | ZAR1L      | 646799    | chr13:32885716-32885716   | Missense_Mutation    | SNP | G      | A       | tCc/tTc       | S116F     |
| 14T | ABCC4      | 10257     | chr13:95847154-95847154   | Missense_Mutation    | SNP | C      | A       | cGt/cTt       | R400L     |
| 14T | ASB2       | 51676     | chr14:94405822-94405822   | Missense_Mutation    | SNP | A      | C       | Ttc/Gtc       | F417V     |
| 14T | OTUB2      | 78990     | chr14:94511025-94511025   | Nonsense_Mutation    | SNP | C      | T       | Cag/Tag       | Q133*     |
| 14T | FAM227B    | 196951    | chr15:49627633-49627633   | Missense_Mutation    | SNP | G      | T       | aaC/aaA       | N444K     |
| 14T | USP8       | 9101      | chr15:50785016-50785016   | Missense_Mutation    | SNP | A      | G       | Act/Gct       | T785A     |
| 14T | AGBL1      | 123624    | chr15:86807802-86807802   | Missense_Mutation    | SNP | C      | T       | gCc/gTc       | A421V     |
| 14T | MYH11      | 4629      | chr16:15892547-15892547   | Splice_Site          | SNP | G      | A       |               |           |
| 14T | HS3ST4     | 9951      | chr16:26147475-26147475   | Missense_Mutation    | SNP | A      | T       | cAc/cTc       | H426L     |
| 14T | APOBR      | 55911     | chr16:28508928-28508928   | Missense_Mutation    | SNP | G      | T       | Gat/Tat       | D856Y     |
|     |            |           |                           |                      |     |        | GCAGCAG |               |           |
|     |            |           |                           |                      |     |        | GTGGTCC | aggaccacctgct |           |
| 14T | KRTAP4-3   | 85290     | chr17:39324305-39324319   | In_Frame_Del         | DEL | T      | -       | gc/-          | RTTCC36-  |
| 14T | PLCD3      | 113026    | chr17:43190893-43190893   | Missense_Mutation    | SNP | C      | T       | Gtc/Atc       | V636I     |
|     |            |           |                           | De_novo_Start_InFram |     |        |         |               |           |
| 14T | ZNF91      | 7644      | chr19:23578250-23578250   | e                    | SNP | G      | C       |               |           |

|     |            |        |                           |                        |     |        |   |               |        |
|-----|------------|--------|---------------------------|------------------------|-----|--------|---|---------------|--------|
| 14T | KIR2DL3    | 3804   | chr19:55255377-55255377   | Missense_Mutation      | SNP | C      | T | Cgt/Tgt       | R169C  |
| 14T | AC007228.1 | 147670 | chr19:57166477-57166477   | Missense_Mutation      | SNP | G      | A | Gtg/Atg       | V85M   |
| 14T | RALB       | 5899   | chr2:121043586-121043586  | Missense_Mutation      | SNP | G      | A | cGg/cAg       | R106Q  |
| 14T | LCT        | 3938   | chr2:136587221-136587221  | Missense_Mutation      | SNP | T      | C | gAt/gGt       | D249G  |
| 14T | UBR3       | 130507 | chr2:170684520-170684520  | Missense_Mutation      | SNP | G      | T | gGc/gTc       | G168V  |
| 14T | JAG1       | 182    | chr20:10639319-10639319   | Missense_Mutation      | SNP | C      | G | aGc/aCc       | S164T  |
| 14T | RSPH1      | 89765  | chr21:43913174-43913174   | Missense_Mutation      | SNP | G      | A | Cgg/Tgg       | R24W   |
| 14T | CLTCL1     | 8218   | chr22:19230425-19230425   | Missense_Mutation      | SNP | G      | T | tCt/tAt       | S185Y  |
| 14T | ABI3BP     | 25890  | chr3:100712233-100712233  | Missense_Mutation      | SNP | C      | T | tGc/tAc       | C6Y    |
| 14T | FAM157A    | 728262 | chr3:197880131-197880136  | In_Frame_Del           | DEL | GCACGA | - | tggcagcag/tgg | WQQ70W |
| 14T | LRRN1      | 57633  | chr3:3886947-3886947      | Missense_Mutation      | SNP | G      | T | Gat/Tat       | D208Y  |
| 14T | ENAM       | 10117  | chr4:71510053-71510053    | Missense_Mutation      | SNP | G      | A | atG/atA       | M970I  |
| 14T | MRPL1      | 65008  | chr4:78784004-78784004    | Translation_Start_Site | SNP | T      | A | aTg/aAg       | M1K    |
| 14T | FAT2       | 2196   | chr5:150922691-150922691  | Missense_Mutation      | SNP | C      | G | gGa/gCa       | G2666A |
| 14T | FLT4       | 2324   | chr5:180055984-180055984  | Missense_Mutation      | SNP | C      | A | aGc/aTc       | S334I  |
| 14T | ADGB       | 79747  | chr6:147073847-147073847  | Missense_Mutation      | SNP | C      | A | Cag/Aag       | Q1183K |
| 14T | DHX16      | 8449   | chr6:30633486-30633486    | Missense_Mutation      | SNP | G      | A | Cgc/Tgc       | R231C  |
| 14T | MOGAT3     | 346606 | chr7:100839381-100839381  | Missense_Mutation      | SNP | A      | C | Tgg/Ggg       | W320G  |
| 14T | CUX1       | 1523   | chr7:101842151-101842151  | Splice_Site            | SNP | T      | C |               |        |
| 14T | DNAJC30    | 84277  | chr7:73097188-73097188    | Missense_Mutation      | SNP | A      | G | cTt/cCt       | L189P  |
| 14T | KIAA0196   | 9897   | chr8:126087247-126087247  | Missense_Mutation      | SNP | C      | A | aGa/aTa       | R324I  |
| 14T | ZNF618     | 114991 | chr9:116811569-116811569  | Missense_Mutation      | SNP | G      | A | Gag/Aag       | E663K  |
| 14T | NXF3       | 56000  | chrX:102334315-102334315  | Missense_Mutation      | SNP | G      | A | tCt/tTc       | S436F  |
| 15T | CCDC18     | 343099 | chr1:93698065-93698069    | Frame_Shift_Del        | DEL | CTCTT  | - | -             | -791   |
| 15T | TRIM29     | 23650  | chr11:119999163-119999163 | Missense_Mutation      | SNP | A      | T | aTc/aAc       | I282N  |
| 15T | EED        | 8726   | chr11:85979502-85979503   | Frame_Shift_Del        | DEL | TT     | - | -             | -289   |
| 15T | CCNA1      | 8900   | chr13:37013005-37013005   | Splice_Site            | SNP | G      | A |               |        |
| 15T | OR4L1      | 122742 | chr14:20529003-20529003   | Missense_Mutation      | SNP | G      | C | aGc/aCc       | S267T  |
| 15T | GOLGA6L2   | 283685 | chr15:23685006-23685006   | Missense_Mutation      | SNP | A      | T | gaT/gaA       | D872E  |
| 15T | TNK1       | 8711   | chr17:7287082-7287082     | Frame_Shift_Del        | DEL | G      | - | -             | -161   |
| 15T | CDC37      | 11140  | chr19:10514115-10514115   | Missense_Mutation      | SNP | T      | G | gAt/gCt       | D14A   |
| 15T | AP2A1      | 160    | chr19:50296320-50296320   | Missense_Mutation      | SNP | G      | C | Gtc/Ctc       | V226L  |
| 15T | ZNF606     | 80095  | chr19:58490778-58490778   | Nonsense_Mutation      | SNP | C      | A | Gga/Tga       | G424*  |
| 15T | MORC1      | 27136  | chr3:108677887-108677887  | Missense_Mutation      | SNP | G      | T | aaC/aaA       | N960K  |
| 15T | RAB7A      | 7879   | chr3:128525287-128525287  | Missense_Mutation      | SNP | G      | A | Gtt/Att       | V85I   |
| 15T | XRN1       | 54464  | chr3:142066097-142066097  | Missense_Mutation      | SNP | T      | C | Aaa/Gaa       | K1286E |
| 15T | PIK3CA     | 5290   | chr3:178947827-178947827  | Missense_Mutation      | SNP | G      | T | tGt/tTt       | C901F  |
| 15T | ULK4       | 54986  | chr3:41996136-41996136    | Missense_Mutation      | SNP | T      | C | aAa/aGa       | K39R   |
| 15T | FAM184B    | 27146  | chr4:17694987-17694987    | Missense_Mutation      | SNP | T      | A | Ata/Tta       | I476L  |
| 15T | GPRIN1     | 114787 | chr5:176026123-176026123  | Missense_Mutation      | SNP | A      | G | tTg/tCg       | L238S  |
| 15T | FGF20      | 26281  | chr8:16853160-16853160    | Splice_Site            | SNP | G      | A |               |        |
| 15T | GPR112     | 139378 | chrX:135430037-135430037  | Missense_Mutation      | SNP | C      | T | cCc/cTc       | P1391L |
| 15T | TBX22      | 50945  | chrX:79286075-79286075    | Missense_Mutation      | SNP | G      | A | tGc/tAc       | C343Y  |
| 16T | MTOR       | 2475   | chr1:11269448-11269448    | Missense_Mutation      | SNP | T      | C | cAa/cGa       | Q1241R |
| 16T | CD101      | 9398   | chr1:117564257-117564257  | Missense_Mutation      | SNP | G      | A | Gat/Aat       | D694N  |
| 16T | FCRL5      | 83416  | chr1:157512826-157512826  | Missense_Mutation      | SNP | G      | A | Cgc/Tgc       | R316C  |
| 16T | F5         | 2153   | chr1:169512203-169512203  | Missense_Mutation      | SNP | T      | C | Atg/Gtg       | M714V  |
| 16T | ARPC5      | 10092  | chr1:183599769-183599769  | Missense_Mutation      | SNP | G      | A | Cgg/Tgg       | R77W   |
| 16T | SLC26A9    | 115019 | chr1:205902165-205902165  | Missense_Mutation      | SNP | A      | G | gTg/gCg       | V58A   |
| 16T | KCNH1      | 3756   | chr1:211093003-211093003  | Missense_Mutation      | SNP | C      | T | Gtg/Atg       | V481M  |
| 16T | DISP1      | 84976  | chr1:223116425-223116425  | Missense_Mutation      | SNP | A      | G | tAc/tGc       | Y87C   |
| 16T | SZT2       | 23334  | chr1:43908604-43908604    | Missense_Mutation      | SNP | C      | A | Cct/Act       | P2699T |
| 16T | PTCH2      | 8643   | chr1:45288829-45288829    | Missense_Mutation      | SNP | G      | A | gCg/gTg       | A1090V |
| 16T | SLC45A1    | 50651  | chr1:8395635-8395635      | Missense_Mutation      | SNP | G      | A | Gtc/Atc       | V562I  |
| 16T | RBM20      | 282996 | chr10:112572693-112572693 | Missense_Mutation      | SNP | G      | A | atG/atA       | M846I  |
| 16T | STOX1      | 219736 | chr10:70644749-70644749   | Missense_Mutation      | SNP | G      | A | atG/atA       | M399I  |
| 16T | VDAC2      | 7417   | chr10:76979060-76979060   | Splice_Site            | SNP | A      | G |               |        |
| 16T | DYNC2H1    | 79659  | chr11:103080620-103080620 | Missense_Mutation      | SNP | T      | C | Ttc/Ctc       | F2824L |
| 16T | BTG4       | 54766  | chr11:111369395-111369395 | Missense_Mutation      | SNP | G      | A | aCg/aTg       | T36M   |
| 16T | SLC6A5     | 9152   | chr11:20652304-20652304   | Missense_Mutation      | SNP | G      | A | Gtt/Att       | V523I  |
| 16T | IMMP1L     | 196294 | chr11:31455068-31455068   | Missense_Mutation      | SNP | G      | A | aCa/aTa       | T124I  |
| 16T | PDE2A      | 5138   | chr11:72299859-72299859   | Missense_Mutation      | SNP | C      | T | Gcc/Acc       | A347T  |
| 16T | EED        | 8726   | chr11:85977144-85977144   | Frame_Shift_Del        | DEL | A      | - | -             | -249   |
| 16T | CACNA1C    | 775    | chr12:2702395-2702395     | Missense_Mutation      | SNP | G      | T | gaG/gaT       | E849D  |
| 16T | C12orf4    | 57102  | chr12:4643351-4643351     | Missense_Mutation      | SNP | G      | A | gCg/gTg       | A99V   |
| 16T | RBMS2      | 5939   | chr12:56975263-56975263   | Missense_Mutation      | SNP | G      | A | Gga/Aga       | G235R  |
| 16T | PTPN6      | 5777   | chr12:7067215-7067215     | Missense_Mutation      | SNP | G      | T | gGg/gTg       | G447V  |
| 16T | ATP11A     | 23250  | chr13:113459311-113459311 | Missense_Mutation      | SNP | A      | G | cAa/cGa       | Q68R   |
| 16T | EML1       | 2009   | chr14:100259856-100259856 | Missense_Mutation      | SNP | T      | C | Tcc/Ccc       | S15P   |
| 16T | OR4N5      | 390437 | chr14:20612258-20612258   | Missense_Mutation      | SNP | C      | T | Cgc/Tgc       | R122C  |
| 16T | OR4N5      | 390437 | chr14:20612322-20612322   | Missense_Mutation      | SNP | C      | G | gCa/gGa       | A143G  |
| 16T | USP31      | 57478  | chr16:23096231-23096231   | Nonsense_Mutation      | SNP | G      | A | Caa/Taa       | Q594*  |
| 16T | IL27       | 246778 | chr16:28515276-28515276   | Missense_Mutation      | SNP | G      | T | Ctg/Atg       | L43M   |
| 16T | CCDC101    | 112869 | chr16:28601455-28601455   | Frame_Shift_Del        | DEL | C      | - | -             | -110   |
| 16T | ATP2A1     | 487    | chr16:28889744-28889744   | De_novo_Start_InFrame  | SNP | C      | A |               |        |
| 16T | LINC00273  | NA     | chr16:33961363-33961363   | Missense_Mutation      | SNP | C      | T | Gcc/Acc       | A360T  |
| 16T | CPNE7      | 27132  | chr16:89661771-89661771   | Splice_Site            | SNP | C      | A |               |        |
| 16T | MYH13      | 8735   | chr17:10219125-10219125   | Missense_Mutation      | SNP | T      | C | gAg/gGg       | E1290G |
| 16T | SCARF1     | 8578   | chr17:1548535-1548535     | Splice_Site            | SNP | T      | C |               |        |
| 16T | NF1        | 4763   | chr17:29562627-29562627   | Splice_Site            | SNP | A      | C |               |        |

|     |            |        |                          |                       |     |          |   |               |           |
|-----|------------|--------|--------------------------|-----------------------|-----|----------|---|---------------|-----------|
| 16T | SRCIN1     | 80725  | chr17:36704789-36704789  | Splice_Site           | SNP | C        | T |               |           |
| 16T | COPZ2      | 51226  | chr17:46110636-46110636  | Missense_Mutation     | SNP | C        | T | Gtc/Atc       | V99I      |
| 16T | CACNA1G    | 8913   | chr17:48653393-48653393  | Frame_Shift_Del       | DEL | G        | - | -             | -544      |
| 16T | GPRC5C     | 55890  | chr17:72436622-72436622  | Missense_Mutation     | SNP | A        | C | aAg/aCg       | K281T     |
| 16T | EVPL       | 2125   | chr17:74003944-74003944  | Missense_Mutation     | SNP | G        | A | gCt/gTt       | A1803V    |
| 16T | MEP1B      | 4225   | chr18:29787340-29787340  | Missense_Mutation     | SNP | G        | T | Gtc/Ttc       | V225F     |
| 16T | RIT2       | 6014   | chr18:40613781-40613781  | Missense_Mutation     | SNP | G        | C | aCt/aGt       | T52S      |
| 16T | CNDP2      | 55748  | chr18:72183461-72183461  | Splice_Site           | SNP | A        | G |               |           |
| 16T | EIF3G      | 8666   | chr19:10226400-10226400  | Missense_Mutation     | SNP | C        | T | cGc/cAc       | R267H     |
| 16T | RGL3       | 57139  | chr19:11529363-11529363  | Missense_Mutation     | SNP | C        | T | gGc/gAc       | G44D      |
| 16T | DAZAP1     | 26528  | chr19:1434870-1434870    | Nonsense_Mutation     | SNP | C        | T | Cag/Tag       | Q395*     |
| 16T | CCDC105    | 126402 | chr19:15132294-15132294  | Missense_Mutation     | SNP | C        | T | tCg/tTg       | S335L     |
| 16T | DMKN       | 93099  | chr19:36002385-36002385  | Missense_Mutation     | SNP | A        | T | agT/agA       | S282R     |
| 16T | SIPA1L3    | 23094  | chr19:38591749-38591749  | Nonsense_Mutation     | SNP | G        | T | Gag/Tag       | E638*     |
| 16T | CATSPERG   | 57828  | chr19:38860676-38860678  | In_Frame_Del          | DEL | TTC      | - | ttc/-         | F1029-    |
| 16T | PSG3       | 5671   | chr19:43237191-43237191  | Missense_Mutation     | SNP | A        | G | Tcc/Ccc       | S152P     |
| 16T | GLTSCR1    | 29998  | chr19:48197625-48197625  | Missense_Mutation     | SNP | C        | T | cCt/cTt       | P846L     |
| 16T | TPRX1      | 284355 | chr19:48305639-48305650  | In_Frame_Del          | DEL | GGGCGCTG | - | ccgatcccaggcc | PIPGP303P |
| 16T | BCAT2      | 587    | chr19:49299426-49299426  | Missense_Mutation     | SNP | G        | A | cCt/cTt       | A262L     |
| 16T | ZNF320     | 162967 | chr19:53384422-53384422  | Missense_Mutation     | SNP | A        | T | caT/caA       | H319Q     |
| 16T | ZNF579     | 163033 | chr19:56090567-56090567  | Nonsense_Mutation     | SNP | G        | A | Cag/Tag       | Q147*     |
| 16T | KHSRP      | 8570   | chr19:6418768-6418768    | Missense_Mutation     | SNP | G        | A | gCg/gTg       | A424V     |
| 16T | HNRNPM     | 4670   | chr19:8550966-8550966    | Missense_Mutation     | SNP | G        | A | Gcc/acc       | A552T     |
| 16T | RAPGEF4    | 11069  | chr2:173879194-173879194 | Missense_Mutation     | SNP | A        | T | tAc/tC        | Y554F     |
| 16T | FSIP2      | 401024 | chr2:186671449-186671449 | Missense_Mutation     | SNP | A        | G | Aca/Gca       | T5895A    |
| 16T | MAP2       | 4133   | chr2:210558183-210558183 | Missense_Mutation     | SNP | G        | T | gGa/gTa       | G430V     |
| 16T | AC110619.2 | NA     | chr2:241390052-241390052 | Missense_Mutation     | SNP | C        | T | Gcc/acc       | A119T     |
| 16T | WDR43      | 23160  | chr2:29165206-29165206   | Missense_Mutation     | SNP | C        | A | gCa/gAa       | A588E     |
| 16T | SPAST      | 6683   | chr2:32289070-32289070   | Missense_Mutation     | SNP | T        | C | cTg/cCg       | L57P      |
| 16T | ASTL       | 431705 | chr2:96789857-96789857   | Missense_Mutation     | SNP | G        | T | cCa/cAa       | P343Q     |
| 16T | BMP7       | 655    | chr20:55758870-55758870  | Missense_Mutation     | SNP | C        | T | cGc/cAc       | R289H     |
| 16T | ISX        | 91464  | chr22:35462860-35462860  | De_novo_Start_InFrame | SNP | C        | T |               |           |
| 16T | SBF1       | 6305   | chr22:50898519-50898519  | Missense_Mutation     | SNP | A        | G | aTg/aCg       | M1118T    |
| 16T | FANCD2     | 2177   | chr3:10081508-10081508   | Missense_Mutation     | SNP | C        | T | gCt/gTt       | A225V     |
| 16T | NLGN1      | 22871  | chr3:173997218-173997218 | Missense_Mutation     | SNP | A        | G | cAc/cGc       | H516R     |
| 16T | BDH1       | 622    | chr3:197241218-197241218 | Missense_Mutation     | SNP | G        | A | aCc/aTc       | T160I     |
| 16T | KIAA0226   | 9711   | chr3:197409490-197409490 | Splice_Site           | SNP | C        | A |               |           |
| 16T | UBE2E1     | 7324   | chr3:23930715-23930715   | Missense_Mutation     | SNP | T        | C | cTt/cCt       | L150P     |
| 16T | CCDC51     | 79714  | chr3:48476470-48476470   | Missense_Mutation     | SNP | C        | A | agG/agT       | R23S      |
| 16T | ATRIP      | 84126  | chr3:48506258-48506258   | Missense_Mutation     | SNP | A        | G | cAc/cGc       | H695R     |
| 16T | HYAL3      | 8372   | chr3:50330790-50330790   | Missense_Mutation     | SNP | G        | T | Ctg/Atg       | L381M     |
| 16T | GLYCTK     | 132158 | chr3:52324575-52324575   | Missense_Mutation     | SNP | C        | T | Cgg/Tgg       | R73W      |
| 16T | CRYBG3     | 131544 | chr3:97593514-97593514   | Missense_Mutation     | SNP | G        | A | gGg/gAg       | G1159E    |
| 16T | CRELD1     | 78987  | chr3:9985179-9985179     | Missense_Mutation     | SNP | G        | C | tGt/tCt       | C343S     |
| 16T | CENPE      | 1062   | chr4:104102538-104102538 | Frame_Shift_Del       | DEL | T        | - | -             | -347      |
| 16T | TRIML2     | 205860 | chr4:189020211-189020211 | Missense_Mutation     | SNP | T        | C | gAa/gGa       | E150G     |
| 16T | PPARGC1B   | 133522 | chr5:149212429-149212429 | Missense_Mutation     | SNP | C        | T | Cgg/Tgg       | R265W     |
| 16T | NDST1      | 3340   | chr5:149924960-149924960 | Missense_Mutation     | SNP | C        | T | gCg/gTg       | A686V     |
| 16T | DRD1       | 1812   | chr5:174869930-174869930 | Missense_Mutation     | SNP | A        | G | gTg/gCg       | V58A      |
| 16T | ANKRD31    | 256006 | chr5:74491653-74491653   | Missense_Mutation     | SNP | T        | C | Aga/Gga       | R274G     |
| 16T | GPR98      | 84059  | chr5:89933605-89933605   | Missense_Mutation     | SNP | C        | A | Ccc/acc       | P694T     |
| 16T | LAMA2      | 3908   | chr6:129591892-129591892 | Missense_Mutation     | SNP | A        | T | Aat/Tat       | N816Y     |
| 16T | SCAF8      | 22828  | chr6:155152176-155152176 | Missense_Mutation     | SNP | G        | C | gGa/gCa       | G820A     |
| 16T | PPP1R18    | 170954 | chr6:30647150-30647150   | Missense_Mutation     | SNP | C        | T | aGc/aAc       | S543N     |
| 16T | ATP6V1G2   | 534    | chr6:31513287-31513287   | Missense_Mutation     | SNP | C        | A | caG/caT       | Q125H     |
| 16T | BRPF3      | 27154  | chr6:36179234-36179236   | In_Frame_Del          | DEL | CAA      | - | ctcaac/ctc    | LN793L    |
| 16T | ZAN        | 7455   | chr7:100345262-100345262 | Nonsense_Mutation     | SNP | C        | T | Cag/Tag       | Q341*     |
| 16T | GPR37      | 2861   | chr7:124404723-124404723 | Missense_Mutation     | SNP | T        | C | gAg/gGg       | E103G     |
| 16T | POT1       | 25913  | chr7:124482942-124482942 | Missense_Mutation     | SNP | C        | T | cGc/cAc       | R361H     |
| 16T | IMPDH1     | 3614   | chr7:128034378-128034378 | Missense_Mutation     | SNP | G        | A | Cgg/Tgg       | R578W     |
| 16T | TBXAS1     | 6916   | chr7:139715576-139715576 | Missense_Mutation     | SNP | C        | A | gCa/gAa       | A474E     |
| 16T | MGAM       | 8972   | chr7:141726933-141726933 | Missense_Mutation     | SNP | C        | T | gCg/gTg       | A334V     |
| 16T | AC006372.1 | NA     | chr7:157318655-157318655 | Missense_Mutation     | SNP | G        | A | Gct/Act       | A37T      |
| 16T | PTPRN2     | 5799   | chr7:157903567-157903567 | Missense_Mutation     | SNP | C        | T | Gtc/Atc       | V556I     |
| 16T | MYO1G      | 64005  | chr7:45018494-45018494   | Nonsense_Mutation     | SNP | C        | A | Gag/Tag       | E23*      |
| 16T | HGF        | 3082   | chr7:81358929-81358929   | Missense_Mutation     | SNP | G        | C | ttC/ttG       | F344L     |
| 16T | PCLO       | 27445  | chr7:82785454-82785454   | Missense_Mutation     | SNP | G        | C | tCt/tGt       | S168C     |
| 16T | LRP12      | 29967  | chr8:105509315-105509315 | Missense_Mutation     | SNP | C        | T | Gtg/Atg       | V489M     |
| 16T | PKHD1L1    | 93035  | chr8:110460538-110460538 | Missense_Mutation     | SNP | G        | A | atG/atA       | M1981I    |
| 16T | SLC30A8    | 169026 | chr8:118147628-118147628 | Missense_Mutation     | SNP | C        | A | aCa/aAa       | T21K      |
| 16T | PUF60      | 22827  | chr8:144903843-144903843 | Missense_Mutation     | SNP | G        | A | gCc/gTc       | A74V      |
| 16T | NRBP2      | 340371 | chr8:144919466-144919466 | Missense_Mutation     | SNP | G        | A | tCg/tTg       | S361L     |
| 16T | SLC39A4    | 55630  | chr8:145639262-145639262 | Missense_Mutation     | SNP | G        | T | Ctg/Atg       | L431M     |
| 16T | PTK2B      | 2185   | chr8:27294635-27294635   | Splice_Site           | SNP | A        | G |               |           |
| 16T | FBXO25     | 26260  | chr8:400045-400045       | Missense_Mutation     | SNP | A        | G | aAg/aGg       | K146R     |
| 16T | PTDSS1     | 9791   | chr8:97312034-97312034   | Frame_Shift_Del       | DEL | G        | - | -             | -238      |
| 16T | RPL35      | 11224  | chr9:127620286-127620286 | Missense_Mutation     | SNP | G        | C | Ctc/Gtc       | L95V      |
| 16T | B4GALT1    | 2683   | chr9:33120546-33120546   | Missense_Mutation     | SNP | A        | G | tTg/tCg       | L236S     |
| 16T | NFX1       | 4799   | chr9:33294754-33294755   | Frame_Shift_Del       | DEL | CA       | - | -             | -121      |
| 16T | DAPK1      | 1612   | chr9:90311928-90311928   | Missense_Mutation     | SNP | G        | A | gGc/gAc       | G807D     |



|     |               |        |                           |                      |     |         |         |               |            |
|-----|---------------|--------|---------------------------|----------------------|-----|---------|---------|---------------|------------|
| 16T | TREX2         | 11219  | chrX:152710665-152710665  | Missense_Mutation    | SNP | C       | T       | aGc/aAc       | S118N      |
| 16T | TREX2         | 11219  | chrX:152719970-152719973  | Splice_Site          | DEL | GGGA    | -       |               |            |
| 16T | PNCK          | 139728 | chrX:152938488-152938488  | Missense_Mutation    | SNP | T       | A       | tAc/tTc       | Y98F       |
| 16T | FOXP3         | 50943  | chrX:49111938-49111938    | Missense_Mutation    | SNP | C       | T       | atG/atA       | M221I      |
| 18T | LCE4A         | 199834 | chr1:152681679-152681679  | Missense_Mutation    | SNP | C       | G       | tCc/tGc       | S43C       |
| 18T | OR2AK2        | 391191 | chr1:248129277-248129277  | Missense_Mutation    | SNP | T       | A       | cTc/cAc       | L215H      |
| 18T | KLHL1         | 57626  | chr13:70535460-70535460   | Missense_Mutation    | SNP | A       | T       | cTt/cAt       | L266H      |
| 18T | CEP152        | 22995  | chr15:49083444-49083444   | Missense_Mutation    | SNP | T       | C       | aAt/aGt       | N321S      |
| 18T | LCTL          | 197021 | chr15:66844145-66844145   | Missense_Mutation    | SNP | T       | A       | aAg/aTg       | K460M      |
| 18T | STRA6         | 64220  | chr15:74476323-74476323   | Missense_Mutation    | SNP | G       | A       | Ctt/Ttt       | L431F      |
| 18T | ERN1          | 2081   | chr17:62125288-62125288   | Missense_Mutation    | SNP | C       | T       | cGc/cAc       | R820H      |
| 18T | OR7C2         | 26658  | chr19:15052676-15052676   | Missense_Mutation    | SNP | A       | G       | Atc/Gtc       | I126V      |
| 18T | FCGBP         | 8857   | chr19:40433964-40433964   | Missense_Mutation    | SNP | T       | C       | aAg/aGg       | K102R      |
| 18T | CBLC          | 23624  | chr19:45293295-45293295   | Missense_Mutation    | SNP | G       | A       | Gac/Aac       | D318N      |
| 18T | PCDP1         | 200373 | chr2:120369269-120369269  | Missense_Mutation    | SNP | G       | A       | cGa/cAa       | R421Q      |
| 18T | FAM117B       | 150864 | chr2:203630405-203630405  | Missense_Mutation    | SNP | G       | A       | cGa/cAa       | R563Q      |
| 18T | SSTR4         | 6754   | chr20:23017231-23017231   | Missense_Mutation    | SNP | C       | A       | Ctg/Atg       | L371M      |
| 19T | FLG           | 2312   | chr1:152281706-152281706  | Missense_Mutation    | SNP | G       | A       | Cat/Tat       | H1886Y     |
| 19T | CHRN2         | 1141   | chr1:154543865-154543865  | Missense_Mutation    | SNP | G       | A       | aGt/aAt       | S189N      |
| 19T | RGL1          | 353299 | chr1:182458236-182458236  | Missense_Mutation    | SNP | T       | A       | aTg/aAg       | M539K      |
| 19T | ADORA1        | 134    | chr1:203098228-203098228  | Missense_Mutation    | SNP | G       | C       | Gtc/Ctc       | V87L       |
| 19T | C1orf65       | 164127 | chr1:223567068-223567068  | Missense_Mutation    | SNP | G       | T       | aGc/aTc       | S84I       |
| 19T | RYR2          | 6262   | chr1:237777404-237777404  | Missense_Mutation    | SNP | G       | T       | cGg/cTg       | R1657L     |
| 19T | TRIT1         | 54802  | chr1:40349132-40349132    | Missense_Mutation    | SNP | G       | T       | cCc/cAc       | P11H       |
| 19T | SLC5A9        | 200010 | chr1:48694788-48694788    | Missense_Mutation    | SNP | G       | T       | aGg/aTg       | R118M      |
| 19T | SPSB1         | 80176  | chr1:9416134-9416134      | Missense_Mutation    | SNP | T       | G       | Tcg/Gcg       | S62A       |
| 19T | SAA2          | 6289   | chr11:18267478-18267478   | Missense_Mutation    | SNP | G       | A       | gCc/gTc       | A70V       |
| 19T | TBX5          | 6910   | chr12:114841695-114841695 | Missense_Mutation    | SNP | G       | C       | gaC/gaG       | D3E        |
|     |               |        |                           |                      |     |         | ACCTCCG |               |            |
|     |               |        |                           |                      |     |         | GAGCCGT | agcagctacggct | SSYSGSG55  |
| 19T | KRT1          | 3848   | chr12:53069223-53069243   | In_Frame_Del         | DEL | AGCTGCT | -       | ccggagggt/-   | 7-         |
| 19T | SMARCC2       | 6601   | chr12:56572631-56572631   | Missense_Mutation    | SNP | T       | A       | gAt/gTt       | D381V      |
| 19T | KCTD12        | 115207 | chr13:77459685-77459685   | Nonsense_Mutation    | SNP | G       | T       | tCg/tAg       | S200*      |
| 19T | RBM23         | 55147  | chr14:23374840-23374840   | Missense_Mutation    | SNP | G       | T       | Cat/Aat       | H144N      |
| 19T | AKAP6         | 9472   | chr14:33291948-33291948   | Missense_Mutation    | SNP | G       | C       | caG/caC       | Q1643H     |
| 19T | GOLGA8F       | NA     | chr15:28632820-28632820   | Missense_Mutation    | SNP | T       | C       | cTg/cCg       | L463P      |
| 19T | APBA2         | 321    | chr15:29393810-29393810   | Missense_Mutation    | SNP | G       | A       | atG/atA       | M449I      |
| 19T | CASC5         | 57082  | chr15:40913900-40913900   | Missense_Mutation    | SNP | G       | A       | Gga/Aga       | G506R      |
| 19T | TMEM87A       | 25963  | chr15:42525452-42525452   | Missense_Mutation    | SNP | G       | C       | Ctt/Gtt       | L341V      |
| 19T | SH3GL3        | 6457   | chr15:84241340-84241340   | Nonsense_Mutation    | SNP | G       | T       | Gaa/Taa       | E127*      |
| 19T | C19orf55      | 148137 | chr19:36250830-36250830   | Missense_Mutation    | SNP | G       | C       | gaG/gaC       | E83D       |
| 19T | IL18RAP       | 8807   | chr2:103068343-103068343  | Missense_Mutation    | SNP | C       | A       | gCc/gAc       | A501D      |
| 19T | SLC9A4        | 389015 | chr2:103142751-103142751  | Missense_Mutation    | SNP | C       | A       | Ccc/Acc       | P662T      |
| 19T | CCDC141       | 285025 | chr2:179701849-179701849  | Missense_Mutation    | SNP | G       | C       | tCt/tGt       | S1366C     |
| 19T | INPP5D        | 3635   | chr2:233986946-233986946  | Missense_Mutation    | SNP | G       | C       | Gac/Cac       | D110H      |
| 19T | PLB1          | 151056 | chr2:28748168-28748168    | Missense_Mutation    | SNP | A       | C       | cAa/cCa       | Q93P       |
| 19T | LTBP1         | 4052   | chr2:33482545-33482545    | Missense_Mutation    | SNP | C       | T       | Cgg/Tgg       | R788W      |
| 19T | SNRNP200      | 23020  | chr2:96943407-96943407    | Missense_Mutation    | SNP | C       | A       | gGg/gTg       | G1934V     |
| 19T | CNGA3         | 1261   | chr2:99012801-99012801    | Missense_Mutation    | SNP | C       | G       | Ctg/Gtg       | L394V      |
| 19T | BCL2L1        | 598    | chr20:30309541-30309541   | Missense_Mutation    | SNP | C       | G       | Gta/Cta       | V161L      |
| 19T | PEX26         | 55670  | chr22:18566327-18566327   | Missense_Mutation    | SNP | C       | T       | Cgg/Tgg       | R166W      |
| 19T | ITGA9         | 3680   | chr3:37560813-37560813    | Missense_Mutation    | SNP | G       | C       | Gat/Cat       | D402H      |
| 19T | PDLIM3        | 27295  | chr4:186423546-186423546  | Missense_Mutation    | SNP | A       | C       | Ttc/Gtc       | F333V      |
|     |               |        |                           |                      |     |         | GCAGCTC | aagcagctcccg/ |            |
| 19T | ANAPC4        | 29945  | chr4:25379100-25379108    | In_Frame_Del         | DEL | CC      | -       | aag           | QQLP17K    |
| 19T | SEL1L3        | 23231  | chr4:25823715-25823715    | Missense_Mutation    | SNP | C       | A       | gGg/gTg       | G398V      |
| 19T | FRYL          | 285527 | chr4:48592787-48592787    | Missense_Mutation    | SNP | C       | T       | Ggt/Agt       | G466S      |
| 19T | LRRc66        | 339977 | chr4:52861026-52861026    | Missense_Mutation    | SNP | G       | A       | gCa/gTa       | A721V      |
| 19T | LRRc66        | 339977 | chr4:52861027-52861027    | Missense_Mutation    | SNP | C       | A       | Gca/Tca       | A721S      |
|     |               |        |                           |                      |     |         | AGCAGTG |               |            |
|     |               |        |                           |                      |     |         | ACACGAG | agcagtgacagca |            |
| 19T | DSPP          | 1834   | chr4:88536014-88536031    | In_Frame_Del         | DEL | CAAC    | -       | gcaac/-       | SSDSSN734- |
| 19T | PCDHGA2       | 56113  | chr5:140719886-140719886  | Missense_Mutation    | SNP | C       | T       | Ccc/Tcc       | P450S      |
| 19T | STK10         | 6793   | chr5:171520444-171520444  | Missense_Mutation    | SNP | T       | C       | aAc/aGc       | N509S      |
| 19T | DAXX          | 1616   | chr6:33289330-33289330    | Missense_Mutation    | SNP | A       | C       | tgT/tgG       | C74W       |
| 19T | ZBTB9         | 221504 | chr6:33424262-33424262    | Missense_Mutation    | SNP | G       | C       | gGc/gCc       | G462A      |
|     |               |        |                           |                      |     |         | AGGTAAG |               |            |
| 19T | RP11-1220K2.2 | NA     | chr7:141864822-141864830  | Frame_Shift_Del      | DEL | AG      | -       | -             | -884       |
| 19T | ADCYAP1R1     | 117    | chr7:31104510-31104510    | Missense_Mutation    | SNP | C       | A       | Cag/Aag       | Q39K       |
| 19T | IKZF1         | 10320  | chr7:50444492-50444492    | Splice_Site          | SNP | G       | C       |               |            |
| 19T | PCMTD1        | 115294 | chr8:52746113-52746113    | Missense_Mutation    | SNP | C       | T       | Gtt/Att       | V183I      |
| 19T | WWP1          | 11059  | chr8:87474055-87474055    | Missense_Mutation    | SNP | G       | C       | tgG/tgC       | W883C      |
|     |               |        |                           | De_novo_Start_InFram |     |         |         |               |            |
| 19T | SLC46A2       | 57864  | chr9:115652983-115652983  |                      | SNP | G       | A       |               |            |
| 19T | RBMXL3        | 139804 | chrX:114426781-114426781  | Missense_Mutation    | SNP | G       | C       | gGg/gCg       | G926A      |
| 20T | ATG12         | 9140   | chr5:115177381-115177381  | Missense_Mutation    | SNP | G       | A       | Cgg/Tgg       | R4W        |
| 2T  | WDR11         | 55717  | chr10:122633387-122633387 | Missense_Mutation    | SNP | C       | A       | aCc/aAc       | T503N      |
| 2T  | CAMK2G        | 818    | chr10:75576829-75576829   | Missense_Mutation    | SNP | C       | A       | Ggt/Tgt       | G496C      |
| 2T  | ELMOD1        | 55531  | chr11:107535762-107535762 | Missense_Mutation    | SNP | C       | T       | Cat/Tat       | H282Y      |
| 2T  | UBQLN3        | 50613  | chr11:5529414-5529414     | Missense_Mutation    | SNP | G       | C       | Ccc/Gcc       | P459A      |
| 2T  | NIPA1         | 123606 | chr15:23060881-23060881   | Missense_Mutation    | SNP | A       | G       | tTc/tCc       | F84S       |
| 2T  | VPS18         | 57617  | chr15:41192635-41192635   | Missense_Mutation    | SNP | G       | A       | cGg/cAg       | R540Q      |

|    |          |        |                           |                      |     |          |    |                |           |
|----|----------|--------|---------------------------|----------------------|-----|----------|----|----------------|-----------|
| 2T | C15orf43 | 145645 | chr15:45258410-45258410   | Missense_Mutation    | SNP | G        | T  | Gca/Tca        | A135S     |
| 2T | RAI1     | 10743  | chr17:17698358-17698358   | Missense_Mutation    | SNP | C        | G  | cCc/cGc        | P699R     |
| 2T | ABCA10   | 10349  | chr17:67215766-67215766   | Frame_Shift_Del      | DEL | A        | -  | -              | -150      |
| 2T | KCTD11   | 147040 | chr17:7256362-7256362     | Missense_Mutation    | SNP | G        | T  | cGg/cTg        | R34L      |
| 2T | TPRX1    | 284355 | chr19:48305639-48305650   | In_Frame_Del         | DEL | GGGCTG   | -  | ccgatcccaggcc  |           |
| 2T | KDM4B    | 23030  | chr19:5077407-5077407     | Missense_Mutation    | SNP | GGATC    | -  | ca/cca         | PIPGP303P |
| 2T | C2orf40  | 84417  | chr2:106682293-106682293  | Missense_Mutation    | SNP | G        | T  | Gac/Tac        | D236Y     |
| 2T | G6PC2    | 57818  | chr2:169764223-169764223  | Missense_Mutation    | SNP | G        | T  | Ggc/Tgc        | G25C      |
| 2T | BIRC6    | 57448  | chr2:32617143-32617144    | Frame_Shift_Ins      | INS | -        | TT | tgG/tgT        | W234C     |
| 2T | YWHAQ    | 10971  | chr2:9770554-9770563      | Frame_Shift_Del      | DEL | CCTTCTG  | -  | -/TT           | -293?     |
| 2T | YWHAQ    | 10971  | chr2:9770608-9770608      | De_novo_Start_InFram | e   | GAT      | -  | -              | -7        |
| 2T | RGS19    | 10287  | chr20:62705343-62705343   | Missense_Mutation    | SNP | A        | T  | Tcc/Acc        | S173T     |
| 2T | CDC42EP1 | 11135  | chr22:37964409-37964429   | In_Frame_Del         | DEL | CAGCGCC  | -  | ccagcgcctgctgc | PAPAANPS2 |
| 2T | MYH15    | 22989  | chr3:108183545-108183545  | Missense_Mutation    | SNP | AAACCCCT | -  | aaacccctca/cca | 53P       |
| 2T | OR2V2    | 285659 | chr5:180582378-180582378  | Missense_Mutation    | SNP | C        | G  | aaG/aaC        | K577N     |
| 2T | ZKSCAN4  | 387032 | chr6:28213204-28213204    | Missense_Mutation    | SNP | A        | G  | Act/Gct        | T146A     |
| 2T | EPHA1    | 2041   | chr7:143095090-143095090  | Missense_Mutation    | SNP | C        | T  | cGg/cAg        | R443Q     |
| 2T | SYBU     | 55638  | chr8:110587382-110587382  | Missense_Mutation    | SNP | A        | T  | aTc/aAc        | I513N     |
| 2T | C8orf42  | 157695 | chr8:442614-442614        | Missense_Mutation    | SNP | C        | G  | tGc/tCc        | C587S     |
| 2T | KIAA2026 | 158358 | chr9:5922247-5922247      | Missense_Mutation    | SNP | Gct/Act  | -  | Gct/Act        | A115T     |
| 4T | KCND3    | 3752   | chr11:112525311-112525311 | Missense_Mutation    | SNP | C        | T  | aGt/aAt        | S1250N    |
| 4T | KCNN3    | 3782   | chr11:154842242-154842244 | In_Frame_Del         | DEL | C        | T  | cGg/cAg        | L13Q      |
| 4T | PTGS2    | 5743   | chr11:186646890-186646890 | Missense_Mutation    | SNP | GAA      | -  | cttcag/cag     | RQ66Q     |
| 4T | PTGS2    | 5743   | chr11:186646891-186646891 | Missense_Mutation    | SNP | G        | A  | cCc/cTc        | P177L     |
| 4T | CC2D1B   | 200014 | chr1:52825017-52825017    | Missense_Mutation    | SNP | G        | T  | Ccc/Acc        | P177T     |
| 4T | TRIM8    | 81603  | chr10:104417052-104417052 | Missense_Mutation    | SNP | T        | C  | cAg/cGg        | Q344R     |
| 4T | DOCK1    | 1793   | chr10:129201389-129201389 | Missense_Mutation    | SNP | C        | T  | Cac/Tac        | H533Y     |
| 4T | TYSND1   | 219743 | chr10:71905927-71905927   | Missense_Mutation    | SNP | A        | G  | gAg/gGg        | E1312G    |
| 4T | DYNC2H1  | 79659  | chr11:103048349-103048349 | Missense_Mutation    | SNP | C        | G  | aGc/aCc        | S139T     |
| 4T | NLRX1    | 79671  | chr11:119044391-119044391 | Missense_Mutation    | SNP | C        | T  | cCa/cTa        | P1980L    |
| 4T | CCDC88B  | 283234 | chr11:64120593-64120593   | Missense_Mutation    | SNP | G        | A  | Gcc/Acc        | A145T     |
| 4T | TIGD3    | 220359 | chr11:65124586-65124586   | Missense_Mutation    | SNP | C        | T  | Cgg/Tgg        | R1190W    |
| 4T | LTBP3    | 4054   | chr11:65311010-65311010   | Missense_Mutation    | SNP | C        | G  | cGg/cAg        | R436Q     |
| 4T | KRTAP5-8 | 57830  | chr11:71249530-71249532   | In_Frame_Del         | DEL | C        | G  | gaG/gaC        | E788D     |
| 4T | USP30    | 84749  | chr12:109495799-109495799 | Missense_Mutation    | SNP | TTC      | -  | tgttcc/tgc     | CS143C    |
| 4T | B3GNT9   | 84752  | chr16:67183815-67183815   | Missense_Mutation    | SNP | G        | A  | Gcc/Acc        | A88T      |
| 4T | PLCG2    | 5336   | chr16:81934315-81934315   | Missense_Mutation    | SNP | T        | A  | Atc/Ttc        | I192F     |
| 4T | KRTAP9-4 | 85280  | chr17:39406416-39406416   | Nonsense_Mutation    | SNP | C        | T  | aCg/aTg        | T431M     |
| 4T | DHX8     | 1659   | chr17:41566815-41566815   | Splice_Site          | SNP | C        | A  | tgC/tgA        | C148*     |
| 4T | NEURL4   | 84461  | chr17:7224979-7224979     | Missense_Mutation    | SNP | A        | G  | gAg/gGg        | E1000G    |
| 4T | NEURL4   | 84461  | chr17:7224980-7224980     | Nonsense_Mutation    | SNP | T        | C  | Gag/Tag        | E1000*    |
| 4T | EMR1     | 2015   | chr19:6897182-6897182     | Missense_Mutation    | SNP | C        | G  | agC/agG        | S87R      |
| 4T | CFD      | 1675   | chr19:861914-861914       | Missense_Mutation    | SNP | C        | G  | gaG/gaC        | E198D     |
| 4T | MUC16    | 94025  | chr19:9000455-9000455     | Missense_Mutation    | SNP | G        | T  | gTc/gCc        | V13510A   |
| 4T | ALS2CR8  | 79800  | chr2:203820452-203820452  | Missense_Mutation    | SNP | A        | T  | Ata/Tta        | I205L     |
| 4T | KIF1A    | 547    | chr2:241696843-241696843  | Missense_Mutation    | SNP | C        | A  | gaG/gaT        | E917D     |
| 4T | SLC3A1   | 6519   | chr2:44508578-44508578    | Missense_Mutation    | SNP | T        | G  | atT/atG        | I221M     |
| 4T | EFCAB8   | 388795 | chr20:31455508-31455508   | Missense_Mutation    | SNP | G        | A  | Gcc/Acc        | A55T      |
| 4T | TSHZ2    | 128553 | chr20:51872635-51872635   | Missense_Mutation    | SNP | C        | A  | Caa/Aaa        | Q880K     |
| 4T | DIDO1    | 11083  | chr20:61512569-61512569   | Missense_Mutation    | SNP | C        | G  | aGg/aCg        | R1580T    |
| 4T | NEFH     | 4744   | chr22:29885599-29885604   | In_Frame_Del         | DEL | AGGAAG   | -  | aaggaagag/aa   | g         |
| 4T | CELSR1   | 9620   | chr22:46760610-46760610   | Missense_Mutation    | SNP | G        | A  | g              | KEE657K   |
| 4T | PPP6R2   | 9701   | chr22:50874867-50874867   | Missense_Mutation    | SNP | G        | A  | Ccg/Tcg        | P2860S    |
| 4T | IQSEC1   | 9922   | chr3:12942511-12942511    | Missense_Mutation    | SNP | A        | G  | Aac/Gac        | N530D     |
| 4T | COL6A6   | 131873 | chr3:130380542-130380542  | Missense_Mutation    | SNP | T        | C  | cAa/cGa        | Q1106R    |
| 4T | DAG1     | 1605   | chr3:49568395-49568395    | Missense_Mutation    | SNP | G        | A  | atG/atA        | M1964I    |
| 4T | RBM5     | 10181  | chr3:50155888-50155889    | Frame_Shift_Del      | DEL | G        | T  | Gtg/Ttg        | V151L     |
| 4T | CACNA2D2 | 9254   | chr3:50402317-50402317    | Splice_Site          | SNP | GA       | -  | -              | -816      |
| 4T | UGT2A1   | 10941  | chr4:70505048-70505048    | Missense_Mutation    | SNP | A        | T  | -              | -         |
| 4T | USO1     | 8615   | chr4:76727667-76727667    | Missense_Mutation    | SNP | A        | C  | aTt/aGt        | I305S     |
| 4T | KIAA0947 | 23379  | chr5:5463498-5463498      | Missense_Mutation    | SNP | A        | G  | gAa/gGa        | E782G     |
| 4T | FAM184A  | 79632  | chr6:119345509-119345509  | Missense_Mutation    | SNP | G        | A  | Gat/Aat        | D1351N    |
| 4T | ATXN1    | 6310   | chr6:16327907-16327909    | In_Frame_Del         | DEL | G        | A  | gCc/gTc        | A210V     |
| 4T | PPIL1    | 51645  | chr6:36842496-36842496    | Missense_Mutation    | SNP | TGA      | -  | catcag/cag     | HQ211Q    |
| 4T | SPAM1    | 6677   | chr7:123593880-123593880  | Missense_Mutation    | SNP | G        | T  | aCc/aAc        | T18N      |
| 4T | PCLO     | 27445  | chr7:82579970-82579970    | Missense_Mutation    | SNP | C        | A  | Caa/Aaa        | Q86K      |
| 4T | ODF1     | 4956   | chr8:103573029-103573037  | In_Frame_Del         | DEL | T        | A  | Att/Ttt        | I3312F    |
| 4T | DLGAP2   | 9228   | chr8:1626529-1626529      | Missense_Mutation    | SNP | TGCAACC  | -  | tgcaaccg/-     | CNP224-   |
| 4T | KIF13B   | 23303  | chr8:29043894-29043894    | Frame_Shift_Del      | DEL | C        | G  | aCc/aGc        | T733S     |
| 4T | PRKDC    | 5591   | chr8:48694949-48694949    | Missense_Mutation    | SNP | C        | -  | -              | -138      |
| 4T | MFHAS1   | 9258   | chr8:8750162-8750162      | Missense_Mutation    | SNP | T        | C  | Atg/Gtg        | M3795V    |
| 4T | NHS      | 4810   | chrX:17744069-17744069    | Missense_Mutation    | SNP | T        | C  | gAg/gGg        | E136G     |
| 4T | XK       | 7504   | chrX:37587361-37587361    | Missense_Mutation    | SNP | G        | A  | Gtc/Atc        | V594I     |
| 4T | PFKFB1   | 5207   | chrX:54964076-54964076    | Missense_Mutation    | SNP | G        | C  | gaG/gaC        | E327D     |
| 7T | CACNA1E  | 777    | chr1:181721295-181721295  | Missense_Mutation    | SNP | G        | T  | Cag/Aag        | Q394K     |
| 7T | CACNA1E  | 777    | chr1:181721295-181721295  | Missense_Mutation    | SNP | G        | C  | Gac/Cac        | D1250H    |

|                    |           |           |                           |                   |     |         |        |              |          |
|--------------------|-----------|-----------|---------------------------|-------------------|-----|---------|--------|--------------|----------|
| 7T                 | DNAH14    | 127602    | chr1:225519194-225519196  | In_Frame_Del      | DEL | AAC     | -      | aaacaa/aaa   | KQ3167K  |
| 7T                 | LRRC53    | NA        | chr1:74946467-74946467    | Nonsense_Mutation | SNP | G       | A      | Caa/Taa      | Q92*     |
| 7T                 | SUFU      | 51684     | chr10:104268923-104268923 | Splice_Site       | SNP | C       | A      |              |          |
| 7T                 | CDH23     | 64072     | chr10:73544679-73544679   | Missense_Mutation | SNP | A       | G      | aAc/aGc      | N1848S   |
| 7T                 | ANO3      | 63982     | chr11:26669256-26669256   | Missense_Mutation | SNP | G       | C      | gGt/gCt      | G810A    |
| 7T                 | KLHL1     | 57626     | chr13:70535460-70535460   | Missense_Mutation | SNP | A       | T      | cTt/cAt      | L266H    |
| 7T                 | CEP152    | 22995     | chr15:49083444-49083444   | Missense_Mutation | SNP | T       | C      | aAt/aGt      | N321S    |
| 7T                 | PLEKH02   | 80301     | chr15:65157813-65157813   | Missense_Mutation | SNP | G       | A      | cGg/cAg      | R400Q    |
| 7T                 | STRA6     | 64220     | chr15:74476323-74476323   | Missense_Mutation | SNP | G       | A      | Ctt/Ttt      | L431F    |
| 7T                 | LINC00273 | NA        | chr16:33961602-33961602   | Missense_Mutation | SNP | G       | A      | gCg/gTg      | A280V    |
| 7T                 | NF1       | 4763      | chr17:29490210-29490210   | Nonsense_Mutation | SNP | A       | T      | Aag/Tag      | K99*     |
| 7T                 | GP1BA     | 2811      | chr17:4836942-4836942     | Missense_Mutation | SNP | C       | A      | tCc/tAc      | S348Y    |
| 7T                 | ERN1      | 2081      | chr17:62125288-62125288   | Missense_Mutation | SNP | C       | T      | cCc/cAc      | R820H    |
| 7T                 | RAC3      | 5881      | chr17:79990294-79990294   | Missense_Mutation | SNP | T       | C      | Tac/Cac      | Y23H     |
| 7T                 | GALR1     | 2587      | chr18:74962598-74962598   | Nonsense_Mutation | SNP | G       | T      | Gag/Tag      | E32*     |
| 7T                 | OR7C2     | 26658     | chr19:15052676-15052676   | Missense_Mutation | SNP | A       | G      | Atc/Gtc      | I126V    |
| 7T                 | FCGBP     | 8857      | chr19:40433964-40433964   | Missense_Mutation | SNP | T       | C      | aAg/aGg      | K102R    |
| 7T                 | CBLC      | 23624     | chr19:45293295-45293295   | Missense_Mutation | SNP | G       | A      | Gac/Aac      | D318N    |
| 7T                 | CCDC155   | 147872    | chr19:49920665-49920666   | In_Frame_Ins      | INS | -       | CTGCTG | -/CTGCTG     | -530LL   |
| 7T                 | KIR2DL4   | 3805      | chr19:55325444-55325444   | Missense_Mutation | SNP | C       | G      | Ccc/Gcc      | P358A    |
| 7T                 | PCDP1     | 200373    | chr2:120369269-120369269  | Missense_Mutation | SNP | G       | A      | cGa/cAa      | R421Q    |
| 7T                 | LRP1B     | 53353     | chr2:141232707-141232707  | Missense_Mutation | SNP | C       | A      | Gtc/Ttc      | V3209F   |
| 7T                 | FAM117B   | 150864    | chr2:203630405-203630405  | Missense_Mutation | SNP | G       | A      | cGa/cAa      | R563Q    |
| 7T                 | PTH2R     | 5746      | chr2:209309528-209309528  | Nonsense_Mutation | SNP | G       | T      | Gaa/Taa      | E257*    |
| CAGCAGC<br>AGCAGCT |           |           |                           |                   |     |         |        |              |          |
| 7T                 | GIGYF2    | 26058     | chr2:233712210-233712230  | In_Frame_Del      | DEL | GCCACAG | -      | cagcagcagcag | QQQLPQ12 |
| 7T                 | SSTR4     | 6754      | chr20:23017231-23017231   | Missense_Mutation | SNP | C       | A      | ctgccacag/-  | 27-      |
| 7T                 | FAM182B   | 548321    | chr20:25755509-25755510   | Frame_Shift_Ins   | INS | -       | CGGC   | -/GCGC       | -149A?   |
| 7T                 | ARHGFEF38 | 54848     | chr4:106588717-106588717  | Missense_Mutation | SNP | G       | T      | Gtg/Ctg      | V669L    |
| 7T                 | NDST4     | 64579     | chr4:115997325-115997325  | Missense_Mutation | SNP | A       | T      | Ttc/Atc      | F290I    |
| 7T                 | C4orf50   | 389197    | chr4:5990708-5990709      | Frame_Shift_Del   | DEL | TC      | -      | -            | -264     |
| 7T                 | SLCO6A1   | 133482    | chr5:101813478-101813478  | Missense_Mutation | SNP | C       | G      | gGg/gCg      | G235A    |
| 7T                 | HSD17B4   | 3295      | chr5:118865659-118865659  | Missense_Mutation | SNP | C       | T      | gCt/gTt      | A638V    |
| 7T                 | MCCC2     | 64087     | chr5:70952658-70952658    | Missense_Mutation | SNP | A       | C      | Aag/Cag      | K555Q    |
| 7T                 | VTA1      | 51534     | chr6:142491539-142491539  | Missense_Mutation | SNP | T       | G      | tTt/tGt      | F131C    |
| CCCCTCC<br>ACTGCCA |           |           |                           |                   |     |         |        |              |          |
| 7T                 | NOX3      | 50508     | chr6:155743975-155743990  | Frame_Shift_Del   | DEL | GC      | -      | -            | -382     |
| 7T                 | PGC       | 5225      | chr6:41708310-41708310    | Missense_Mutation | SNP | C       | A      | gGt/gTt      | G229V    |
| 7T                 | AGAP3     | 116988    | chr7:150840917-150840917  | Missense_Mutation | SNP | A       | G      | Atc/Gtc      | I875V    |
| 7T                 | AGMO      | 392636    | chr7:15425188-15425188    | Splice_Site       | SNP | C       | A      |              |          |
| 7T                 | COL28A1   | 340267    | chr7:7459558-7459558      | Frame_Shift_Del   | DEL | T       | -      | -            | -675     |
| 7T                 | COL1A2    | 1278      | chr7:94057062-94057068    | Frame_Shift_Del   | DEL | AAGGACT | -      | -            | -1131    |
| 7T                 | BAALC     | 79870     | chr8:104225228-104225228  | Missense_Mutation | SNP | C       | T      | aCg/aTg      | T116M    |
| 7T                 | MTMR7     | 9108      | chr8:17157708-17157708    | Missense_Mutation | SNP | T       | A      | cAg/cTg      | Q549L    |
| 7T                 | UBXN2B    | 137886    | chr8:59329469-59329469    | Missense_Mutation | SNP | C       | G      | Cct/Gct      | P49A     |
| 7T                 | BHLHE22   | 27319     | chr8:65494017-65494018    | In_Frame_Ins      | INS | -       | GCA    | ggc/gGCAgc   | G224GS   |
| 7T                 | C9orf174  | 100499483 | chr9:100090424-100090424  | Missense_Mutation | SNP | A       | G      | gAa/gGa      | E639G    |
| 7T                 | CACNA1B   | 774       | chr9:140772670-140772672  | Frame_Shift_Del   | DEL | ATA     | -      | -            | -95      |
| 7T                 | GLIS3     | 169792    | chr9:4286157-4286157      | Missense_Mutation | SNP | A       | C      | aTg/aGg      | M90R     |
| 7T                 | CNKSR2    | 22866     | chrX:21627515-21627515    | Nonsense_Mutation | SNP | C       | A      | taC/taA      | Y824*    |
| 8T                 | FCRL3     | 115352    | chr1:157650551-157650551  | Missense_Mutation | SNP | C       | G      | gGa/gCa      | G656A    |
| 8T                 | APOBEC4   | 403314    | chr1:183616968-183616968  | Missense_Mutation | SNP | C       | G      | Gta/Cta      | V317L    |
| 8T                 | TAS1R2    | 80834     | chr1:19166845-19166845    | Missense_Mutation | SNP | G       | A      | Cac/Tac      | H590Y    |
| 8T                 | EPS15     | 2060      | chr1:51871581-51871581    | Missense_Mutation | SNP | G       | C      | tCt/tGt      | S558C    |
| 8T                 | MKI67     | 4288      | chr10:129910700-129910700 | Nonsense_Mutation | SNP | G       | A      | Caa/Taa      | Q556*    |
| 8T                 | CCDC81    | 60494     | chr11:86111834-86111834   | Frame_Shift_Del   | DEL | C       | -      | -            | -291     |
| 8T                 | RECQL     | 5965      | chr12:21636469-21636469   | Missense_Mutation | SNP | T       | G      | Aac/Cac      | N181H    |
| 8T                 | PCNX      | 22990     | chr14:71476358-71476358   | Missense_Mutation | SNP | C       | G      | ttC/ttG      | F879L    |
| 8T                 | RSL24D1   | 51187     | chr15:55475536-55475536   | Missense_Mutation | SNP | T       | G      | cAt/cCt      | H132P    |
| 8T                 | NF1       | 4763      | chr17:29496946-29496946   | Missense_Mutation | SNP | G       | T      | Gat/Tat      | D173Y    |
| 8T                 | CD300LF   | 146722    | chr17:72700807-72700807   | Missense_Mutation | SNP | G       | C      | atC/atG      | I64M     |
| 8T                 | TP53      | 7157      | chr17:7577121-7577121     | Missense_Mutation | SNP | G       | A      | Cgt/Tgt      | R273C    |
| 8T                 | DNM2      | 1785      | chr19:10909174-10909174   | Missense_Mutation | SNP | C       | G      | Ccc/Gcc      | P450A    |
| 8T                 | CYP4F12   | 66002     | chr19:15807274-15807274   | Missense_Mutation | SNP | G       | T      | aGc/aTc      | S450I    |
| 8T                 | RHPN2     | 85415     | chr19:33490564-33490564   | Missense_Mutation | SNP | G       | T      | Ctc/Atc      | L385I    |
| 8T                 | KCNJ14    | 3770      | chr19:48968002-48968002   | Missense_Mutation | SNP | A       | C      | Aca/Cca      | T427P    |
| 8T                 | C3        | 718       | chr19:6713444-6713444     | Missense_Mutation | SNP | G       | T      | Ctg/Atg      | L284M    |
| 8T                 | KDM3A     | 55818     | chr2:86693730-86693730    | Nonsense_Mutation | SNP | A       | T      | Aag/Tag      | K415*    |
| 8T                 | LPIN3     | 64900     | chr20:39986529-39986529   | Missense_Mutation | SNP | T       | C      | Tac/Cac      | Y683H    |
| 8T                 | DZIP3     | 9666      | chr3:108353817-108353817  | Missense_Mutation | SNP | C       | A      | Cag/Aag      | Q306K    |
| 8T                 | CAND2     | 23066     | chr3:12858844-12858844    | Missense_Mutation | SNP | G       | A      | Gcc/Acc      | A805T    |
| 8T                 | C3orf58   | 205428    | chr3:143691671-143691671  | Missense_Mutation | SNP | A       | G      | gAc/gGc      | D166G    |
| 8T                 | CLGN      | 1047      | chr4:141320022-141320022  | Frame_Shift_Del   | DEL | G       | -      | -            | -289     |
| 8T                 | FREM3     | 166752    | chr4:144498982-144498982  | Missense_Mutation | SNP | T       | C      | Agc/Ggc      | S2068G   |
| 8T                 | TMEM156   | 80008     | chr4:38990491-38990491    | Missense_Mutation | SNP | C       | T      | aGa/aAa      | R240K    |
| 8T                 | TBP       | 6908      | chr6:170871038-170871040  | In_Frame_Del      | DEL | CAA     | -      | caa/-        | Q72-     |
| 8T                 | EHMT2     | 10919     | chr6:31857080-31857080    | Nonsense_Mutation | SNP | G       | A      | Cga/Tga      | R404*    |
| 8T                 | FTSJD2    | 23070     | chr6:37429368-37429368    | Missense_Mutation | SNP | G       | A      | aGc/aAc      | S380N    |
| 8T                 | MUC12     | 10071     | chr7:100636426-100636426  | Missense_Mutation | SNP | C       | T      | aCg/aTg      | T1004M   |
| 8T                 | PTPRZ1    | 5803      | chr7:121652183-121652183  | Missense_Mutation | SNP | C       | A      | aCa/aAa      | T1028K   |

|                      |               |        |                           |                   |     |    |   |                  |         |
|----------------------|---------------|--------|---------------------------|-------------------|-----|----|---|------------------|---------|
| 8T                   | GTPBP10       | 85865  | chr7:90014334-90014334    | Missense_Mutation | SNP | G  | A | Gat/Aat          | D344N   |
| 8T                   | RP1L1         | 94137  | chr8:10467581-10467581    | Missense_Mutation | SNP | C  | T | Gaa/Aaa          | E1343K  |
| 9T                   | FMO5          | 2330   | chr1:146684093-146684093  | Missense_Mutation | SNP | C  | A | aaG/aaT          | K166N   |
| 9T                   | FLG           | 2312   | chr1:152281706-152281706  | Missense_Mutation | SNP | G  | A | CaT/Tat          | H1886Y  |
| 9T                   | MR1           | 3140   | chr1:181018451-181018451  | Splice_Site       | SNP | G  | A |                  |         |
| 9T                   | RGSL1         | 353299 | chr1:182458236-182458236  | Missense_Mutation | SNP | T  | A | aTg/aAg          | M539K   |
| 9T                   | C1orf65       | 164127 | chr1:223567068-223567068  | Missense_Mutation | SNP | G  | T | aGc/aTc          | S84I    |
| 9T                   | TRIT1         | 54802  | chr1:40349132-40349132    | Missense_Mutation | SNP | G  | T | cCc/cAc          | P11H    |
| 9T                   | SLC5A9        | 200010 | chr1:48694788-48694788    | Missense_Mutation | SNP | G  | T | aGg/aTg          | R118M   |
| 9T                   | SLC1A7        | 6512   | chr1:53558269-53558269    | Missense_Mutation | SNP | C  | A | Ggc/Tgc          | G330C   |
| 9T                   | SPSB1         | 80176  | chr1:9416134-9416134      | Missense_Mutation | SNP | T  | G | Tcg/Gcg          | S62A    |
| 9T                   | CCDC172       | 374355 | chr10:118101703-118101703 | Missense_Mutation | SNP | G  | T | atG/atT          | M146I   |
| 9T                   | SORL1         | 6653   | chr11:121458806-121458806 | Missense_Mutation | SNP | G  | A | Gga/Aga          | G1298R  |
| 9T                   | PITPNM1       | 9600   | chr11:67266224-67266224   | Missense_Mutation | SNP | G  | A | Cct/Tct          | P443S   |
| 9T                   | RBM23         | 55147  | chr14:23374840-23374840   | Missense_Mutation | SNP | G  | T | CaT/Aat          | H144N   |
| 9T                   | AKAP6         | 9472   | chr14:33291948-33291948   | Missense_Mutation | SNP | G  | C | caG/caC          | Q1643H  |
| 9T                   | APBA2         | 321    | chr15:29393810-29393810   | Missense_Mutation | SNP | G  | A | atG/atA          | M449I   |
| 9T                   | CASC5         | 57082  | chr15:40913900-40913900   | Missense_Mutation | SNP | G  | A | Gga/Aga          | G506R   |
| 9T                   | TMEM87A       | 25963  | chr15:42525452-42525452   | Missense_Mutation | SNP | G  | C | Ctt/Gtt          | L341V   |
| 9T                   | SH3GL3        | 6457   | chr15:84241340-84241340   | Nonsense_Mutation | SNP | G  | T | Gaa/Taa          | E127*   |
| 9T                   | TCF25         | 22980  | chr16:89971406-89971406   | Missense_Mutation | SNP | G  | T | tgG/tgT          | W510C   |
| 9T                   | NCOR1         | 9611   | chr17:15960951-15960951   | Missense_Mutation | SNP | G  | C | tCt/tGt          | S2090C  |
| 9T                   | OR4D1         | 26689  | chr17:56232770-56232770   | Missense_Mutation | SNP | C  | T | Ctc/Ttc          | L86F    |
| 9T                   | ZNF536        | 9745   | chr19:30934477-30934477   | Missense_Mutation | SNP | A  | G | gAa/gGa          | E3G     |
| 9T                   | IL18RAP       | 8807   | chr2:103068343-103068343  | Missense_Mutation | SNP | C  | A | gCc/gAc          | A501D   |
| 9T                   | RPRM          | 56475  | chr2:154334920-154334920  | Missense_Mutation | SNP | T  | G | Atg/Ctg          | M54L    |
| 9T                   | CCDC141       | 285025 | chr2:179701849-179701849  | Missense_Mutation | SNP | G  | C | tCt/tGt          | S1366C  |
| 9T                   | INPP5D        | 3635   | chr2:233986946-233986946  | Missense_Mutation | SNP | G  | C | Gac/Cac          | D110H   |
| 9T                   | SNRNP200      | 23020  | chr2:96943407-96943407    | Missense_Mutation | SNP | C  | A | gGg/gTg          | G1934V  |
| 9T                   | CNGA3         | 1261   | chr2:99012801-99012801    | Missense_Mutation | SNP | C  | G | Ctg/Gtg          | L394V   |
| 9T                   | BCL2L1        | 598    | chr20:30309541-30309541   | Missense_Mutation | SNP | C  | G | Gta/Cta          | V161L   |
| 9T                   | PEX26         | 55670  | chr22:18566327-18566327   | Missense_Mutation | SNP | C  | T | Cgg/Tgg          | R166W   |
| 9T                   | ITGA9         | 3680   | chr3:37560813-37560813    | Missense_Mutation | SNP | G  | C | Gat/Cat          | D402H   |
| De_novo_Start_InFram |               |        |                           |                   |     |    |   |                  |         |
| 9T                   | TLR2          | 7097   | chr4:154623916-154623916  | e                 | SNP | G  | T |                  |         |
| 9T                   | PDLIM3        | 27295  | chr4:186423546-186423546  | Missense_Mutation | SNP | A  | C | Ttc/Gtc          | F333V   |
| GCAGCTC              |               |        |                           |                   |     |    |   |                  |         |
| 9T                   | ANAPC4        | 29945  | chr4:25379100-25379108    | In_Frame_Del      | DEL | CC | - | aagcagctcccg/aag | KQLP17K |
| 9T                   | FRYL          | 285527 | chr4:48592787-48592787    | Missense_Mutation | SNP | C  | T | Ggt/Agt          | G466S   |
| 9T                   | LRRC66        | 339977 | chr4:52861026-52861026    | Missense_Mutation | SNP | G  | A | gCa/gTa          | A721V   |
| 9T                   | LRRC66        | 339977 | chr4:52861027-52861027    | Missense_Mutation | SNP | C  | A | Gca/Tca          | A721S   |
| 9T                   | UGT2B15       | 7366   | chr4:69536038-69536038    | Missense_Mutation | SNP | C  | A | gGt/gTt          | G100V   |
| 9T                   | PCDHGA2       | 56113  | chr5:140719886-140719886  | Missense_Mutation | SNP | C  | T | Ccc/Tcc          | P450S   |
| 9T                   | PCDHGB3       | 56102  | chr5:140751268-140751268  | Missense_Mutation | SNP | A  | C | aAg/aCg          | K436T   |
| 9T                   | STK10         | 6793   | chr5:171520444-171520444  | Missense_Mutation | SNP | T  | C | aAc/aGc          | M509S   |
| 9T                   | AMACR         | 23600  | chr5:34005972-34005972    | Missense_Mutation | SNP | T  | C | Att/Gtt          | I94V    |
| 9T                   | DAXX          | 1616   | chr6:33289330-33289330    | Missense_Mutation | SNP | A  | C | tgT/tgG          | C74W    |
| 9T                   | ZBTB9         | 221504 | chr6:33424262-33424262    | Missense_Mutation | SNP | G  | C | gGc/gCc          | G462A   |
| AGGTAAG              |               |        |                           |                   |     |    |   |                  |         |
| 9T                   | RP11-1220K2.2 | NA     | chr7:141864822-141864830  | Frame_Shift_Del   | DEL | AG | - | -                | -884    |
| 9T                   | NT5C3         | 51251  | chr7:33054364-33054364    | Missense_Mutation | SNP | G  | C | tCt/tGt          | S330C   |
| 9T                   | DPYS          | 1807   | chr8:105441854-105441854  | Missense_Mutation | SNP | T  | C | cAc/cGc          | H290R   |
| 9T                   | ARHGAP39      | 80728  | chr8:145770939-145770939  | Missense_Mutation | SNP | C  | T | Gtg/Atg          | V739M   |
| 9T                   | PCMTD1        | 115294 | chr8:52746113-52746113    | Missense_Mutation | SNP | C  | T | Gtt/Att          | V183I   |
| 9T                   | TGS1          | 96764  | chr8:56699449-56699449    | Missense_Mutation | SNP | T  | G | gTa/gGa          | V331G   |
| 9T                   | SGK223        | 157285 | chr8:8175848-8175848      | Missense_Mutation | SNP | G  | T | aCg/aAg          | T1346K  |
| 9T                   | WWP1          | 11059  | chr8:87474055-87474055    | Missense_Mutation | SNP | G  | C | tgG/tgC          | W883C   |
| De_novo_Start_InFram |               |        |                           |                   |     |    |   |                  |         |
| 9T                   | SLC46A2       | 57864  | chr9:115652983-115652983  | e                 | SNP | G  | A |                  |         |
| 9T                   | CEL           | 1056   | chr9:135945963-135945963  | Missense_Mutation | SNP | G  | C | Gcc/Ccc          | A471P   |
| 9T                   | RBMXL3        | 139804 | chrX:114426781-114426781  | Missense_Mutation | SNP | G  | C | gGg/gCg          | G926A   |
| 9T                   | GPR64         | 10149  | chrX:19017284-19017284    | Missense_Mutation | SNP | A  | T | aTt/aAt          | I815N   |

### Supplementary Table 4: Genes sequenced in IMPACT assay

| HUGO Symbol | Approved name                                                     | Location        |
|-------------|-------------------------------------------------------------------|-----------------|
| ABL1        | c-abl oncogene 1, non-receptor tyrosine kinase                    | 9q34.1          |
| ACIN1       | apoptotic chromatin condensation inducer 1                        | 14q11.2         |
| AEBP2       | AE binding protein 2                                              | 12p12.3         |
| AKT1        | v-akt murine thymoma viral oncogene homolog 1                     | 14q32.32-q32.33 |
| AKT2        | v-akt murine thymoma viral oncogene homolog 2                     | 19q13.1-q13.2   |
| AKT3        | v-akt murine thymoma viral oncogene homolog 3                     | 1q44            |
| ALK         | anaplastic lymphoma receptor tyrosine kinase                      | 2p23            |
| ALOX12B     | arachidonate 12-lipoxygenase, 12R type                            | 17p13.1         |
| APC         | adenomatous polyposis coli                                        | 5q21-q22        |
| AR          | androgen receptor                                                 | Xq12            |
| ARAF        | v-raf murine sarcoma 3611 viral oncogene homolog                  | Xp11.3-p11.23   |
| ARID1A      | AT rich interactive domain 1A (SWI-like)                          | 1p36.1-p35      |
| ARID1B      | AT rich interactive domain 1B (SWI1-like)                         | 6q25.3          |
| ARID2       | AT rich interactive domain 2 (ARID, RFX-like)                     | 12q13.11        |
| ARID5B      | AT rich interactive domain 5B (MRF1-like)                         | 10q11.22        |
| ASXL1       | additional sex combs like 1 (Drosophila)                          | 20q11           |
| ASXL2       | additional sex combs like 2 (Drosophila)                          | 2p24.1          |
| ATM         | ataxia telangiectasia mutated                                     | 11q22-q23       |
| ATR         | ataxia telangiectasia and Rad3 related                            | 3q23            |
| ATRX        | alpha thalassemia/mental retardation syndrome X-linked            | Xq21.1          |
| AURKA       | aurora kinase A                                                   | 20q13           |
| AURKB       | aurora kinase B                                                   | 17p13.1         |
| AXIN1       | axin 1                                                            | 16p13.3         |
| AXIN2       | axin 2                                                            | 17q23-q24       |
| AXL         | AXL receptor tyrosine kinase                                      | 19q13.1         |
| B2M         | beta-2-microglobulin                                              | 15q21-q22.2     |
| BAP1        | BRCA1 associated protein-1 (ubiquitin carboxy-terminal hydrolase) | 3p21.31-p21.2   |
| BARD1       | BRCA1 associated RING domain 1                                    | 2q34-q35        |
| BBC3        | BCL2 binding component 3                                          | 19q13.3-q13.4   |
| BCL2        | B-cell CLL/lymphoma 2                                             | 18q21.3         |
| BCL2L1      | BCL2-like 1                                                       | 20q11.21        |
| BCL2L11     | BCL2-like 11 (apoptosis facilitator)                              | 2q13            |
| BCL6        | B-cell CLL/lymphoma 6                                             | 3q27            |
| BCOR        | BCL6 corepressor                                                  | Xp11.4          |
| BIRC6       | baculoviral IAP repeat containing 6                               | 2p22.3          |
| BLM         | Bloom syndrome, RecQ helicase-like                                | 15q26.1         |
| BMPR1A      | bone morphogenetic protein receptor, type IA                      | 10q22.3         |
| BRAF        | v-raf murine sarcoma viral oncogene homolog B                     | 7q34            |
| BRCA1       | breast cancer 1, early onset                                      | 17q21.31        |
| BRCA2       | breast cancer 2, early onset                                      | 13q12-q13       |
| BRD4        | bromodomain containing 4                                          | 19p13.12        |
| BRIP1       | BRCA1 interacting protein C-terminal helicase 1                   | 17q22.2         |
| BTK         | Bruton agammaglobulinemia tyrosine kinase                         | Xq21.33-q22     |
| CARD11      | caspace recruitment domain family, member 11                      | 7p22            |
| CARF        | calcium responsive transcription factor                           | 2q33.3          |
| CASP8       | caspace 8, apoptosis-related cysteine peptidase                   | 2q33-q34        |
| CBFB        | core-binding factor, beta subunit                                 | 16q22.1         |
| CBL         | Cbl proto-oncogene, E3 ubiquitin protein ligase                   | 11q23.3         |
| CCND1       | cyclin D1                                                         | 11q13           |
| CCND2       | cyclin D2                                                         | 12p13           |
| CCND3       | cyclin D3                                                         | 6p21            |
| CCNE1       | cyclin E1                                                         | 19q12           |
| CD274       | CD274 molecule                                                    | 9p24.1          |
| CD276       | CD276 molecule                                                    | 15q23-q24       |
| CD79B       | CD79b molecule, immunoglobulin-associated beta                    | 17q23           |
| CDC73       | cell division cycle 73                                            | 1q25            |

|         |                                                                 |                   |
|---------|-----------------------------------------------------------------|-------------------|
| CDH1    | cadherin 1, type 1, E-cadherin (epithelial)                     | 16q22.1           |
| CDHR2   | cadherin-related family member 2                                | 5q35.2            |
| CDK12   | cyclin-dependent kinase 12                                      | 17q12             |
| CDK4    | cyclin-dependent kinase 4                                       | 12q13             |
| CDK6    | cyclin-dependent kinase 6                                       | 7q21-q22          |
| CDK8    | cyclin-dependent kinase 8                                       | 13q12             |
| CDKN1A  | cyclin-dependent kinase inhibitor 1A (p21, Cip1)                | 6p21.1            |
| CDKN1B  | cyclin-dependent kinase inhibitor 1B (p27, Kip1)                | 12p13.1-p12       |
| CDKN2A  | cyclin-dependent kinase inhibitor 2A                            | 9p21              |
| CDKN2B  | cyclin-dependent kinase inhibitor 2B (p15, inhibits CDK4)       | 9p21              |
| CDKN2C  | cyclin-dependent kinase inhibitor 2C (p18, inhibits CDK4)       | 1p32.3            |
| CHEK1   | checkpoint kinase 1                                             | 11q24.2           |
| CHEK2   | checkpoint kinase 2                                             | 22q12.1           |
| CIC     | capicua transcriptional repressor                               | 19q13.2           |
| CREBBP  | CREB binding protein                                            | 16p13.3           |
| CRKL    | v-crk avian sarcoma virus CT10 oncogene homolog-like            | 22q11.21          |
| CRLF2   | cytokine receptor-like factor 2                                 | Xp22.3 and Yp11.1 |
| CSF1R   | colony stimulating factor 1 receptor                            | 5q32              |
| CTCF    | CCCTC-binding factor (zinc finger protein)                      | 16q21-q22.3       |
| CTLA4   | cytotoxic T-lymphocyte-associated protein 4                     | 2q33              |
| CTNNB1  | catenin (cadherin-associated protein), beta 1, 88kDa            | 3p21              |
| CUL3    | cullin 3                                                        | 2q36.2            |
| DAXX    | death-domain associated protein                                 | 6p21.3            |
| DCLRE1C | DNA cross-link repair 1C                                        | 10p13             |
| DCUN1D1 | DCN1, defective in cullin neddylation 1, domain containing 1    | 3q26.3            |
| DDR2    | discoidin domain receptor tyrosine kinase 2                     | 1q12-q23          |
| DICER1  | dicer 1, ribonuclease type III                                  | 14q32.13          |
| DIS3    | DIS3 exosome endoribonuclease and 3'-5' exoribonuclease         | 13q21.32          |
| DNMT1   | DNA (cytosine-5-)-methyltransferase 1                           | 19p13.2           |
| DNMT3A  | DNA (cytosine-5-)-methyltransferase 3 alpha                     | 2p23              |
| DNMT3B  | DNA (cytosine-5-)-methyltransferase 3 beta                      | 20q11.2           |
| DOT1L   | DOT1-like histone H3K79 methyltransferase                       | 19p13.3           |
| E2F3    | E2F transcription factor 3                                      | 6p22              |
| EED     | embryonic ectoderm development                                  | 11q14.2-q22.3     |
| EGFL7   | EGF-like-domain, multiple 7                                     | 9q34.3            |
| EGFR    | epidermal growth factor receptor                                | 7p12              |
| EIF1AX  | eukaryotic translation initiation factor 1A, X-linked           | Xp22.13           |
| EP300   | E1A binding protein p300                                        | 22q13.2           |
| EPCAM   | epithelial cell adhesion molecule                               | 2p21              |
| EPHA3   | EPH receptor A3                                                 | 3p11.2            |
| EPHA5   | EPH receptor A5                                                 | 4q13.1            |
| EPHB1   | EPH receptor B1                                                 | 3q21-q23          |
| ERBB2   | v-erb-b2 avian erythroblastic leukemia viral oncogene homolog 2 | 17q11.2-q12       |
| ERBB3   | v-erb-b2 avian erythroblastic leukemia viral oncogene homolog 3 | 12q13             |
| ERBB4   | v-erb-b2 avian erythroblastic leukemia viral oncogene homolog 4 | 2q33.3-q34        |
| ERCC2   | excision repair cross-complementation group 2                   | 19q13.3           |
| ERCC3   | excision repair cross-complementation group 3                   | 2q21              |
| ERCC4   | excision repair cross-complementation group 4                   | 16p13.3           |
| ERCC5   | excision repair cross-complementation group 5                   | 13q22-q34         |
| ERCC6   | excision repair cross-complementation group 6                   | 10q11             |
| ERG     | v-ets avian erythroblastosis virus E26 oncogene homolog         | 21q22.3           |
| ESR1    | estrogen receptor 1                                             | 6q24-q27          |
| ETV1    | ets variant 1                                                   | 7p22              |
| ETV6    | ets variant 6                                                   | 12p13             |
| EZH1    | enhancer of zeste homolog 1 (Drosophila)                        | 17q21.1-q21.3     |
| EZH2    | enhancer of zeste homolog 2 (Drosophila)                        | 7q35-q36          |
| FAM123B | APC membrane recruitment protein 1                              | Xq11.1            |
| FAM175A | family with sequence similarity 175, member A                   | 4q21.23           |
| FAM46C  | family with sequence similarity 46, member C                    | 1p12              |

|           |                                                                               |                |
|-----------|-------------------------------------------------------------------------------|----------------|
| FANCA     | Fanconi anemia, complementation group A                                       | 16q24.3        |
| FANCB     | Fanconi anemia, complementation group B                                       | Xp22.2         |
| FANCC     | Fanconi anemia, complementation group C                                       | 9q22.3         |
| FANCD2    | Fanconi anemia, complementation group D2                                      | 3p25.3         |
| FANCE     | Fanconi anemia, complementation group E                                       | 6p22-p21       |
| FANCF     | Fanconi anemia, complementation group F                                       | 11p15          |
| FANCG     | Fanconi anemia, complementation group G                                       | 9p13           |
| FAT1      | FAT atypical cadherin 1                                                       | 4q35.2         |
| FBXW7     | F-box and WD repeat domain containing 7, E3 ubiquitin protein ligase          | 4q31.23        |
| FGF19     | fibroblast growth factor 19                                                   | 11q13.1        |
| FGF3      | fibroblast growth factor 3                                                    | 11q13          |
| FGF4      | fibroblast growth factor 4                                                    | 11q13.3        |
| FGFR1     | fibroblast growth factor receptor 1                                           | 8p11.23-p11.22 |
| FGFR2     | fibroblast growth factor receptor 2                                           | 10q25.3-q26    |
| FGFR3     | fibroblast growth factor receptor 3                                           | 4p16.3         |
| FGFR4     | fibroblast growth factor receptor 4                                           | 5q35.2         |
| FH        | fumarate hydratase                                                            | 1q42.1         |
| FLCN      | folliculin                                                                    | 17p11.2        |
| FLT1      | fms-related tyrosine kinase 1                                                 | 13q12          |
| FLT3      | fms-related tyrosine kinase 3                                                 | 13q12          |
| FLT4      | fms-related tyrosine kinase 4                                                 | 5q34-q35       |
| FOXA1     | forkhead box A1                                                               | 14q12-q13      |
| FOXL2     | forkhead box L2                                                               | 3q23           |
| FOXP1     | forkhead box P1                                                               | 3p14.1         |
| FUBP1     | far upstream element (FUSE) binding protein 1                                 | 1p31.1         |
| GATA1     | GATA binding protein 1 (globin transcription factor 1)                        | Xp11.23        |
| GATA2     | GATA binding protein 2                                                        | 3q21           |
| GATA3     | GATA binding protein 3                                                        | 10p15          |
| GNA11     | guanine nucleotide binding protein (G protein), alpha 11 (Gq class)           | 19p13.3        |
| GNAQ      | guanine nucleotide binding protein (G protein), q polypeptide                 | 9q21           |
| GNAS      | GNAS complex locus                                                            | 20q13.2-q13.3  |
| GREM1     | gremlin 1, DAN family BMP antagonist                                          | 15q13.3        |
| GRIN2A    | glutamate receptor, ionotropic, N-methyl D-aspartate 2A                       | 16p13.2        |
| GSK3B     | glycogen synthase kinase 3 beta                                               | 3q13.3         |
| H3F3A     | H3 histone, family 3A                                                         | 1q42.12        |
| H3F3B     | H3 histone, family 3B (H3.3B)                                                 | 17q25.1        |
| H3F3C     | H3 histone, family 3C                                                         | 12p11.21       |
| HAO       | 3-hydroxyanthranilate 3,4-dioxygenase                                         | 2p             |
| HGF       | hepatocyte growth factor (hepatopoietin A; scatter factor)                    | 7q21.1         |
| HIST1H1C  | histone cluster 1, H1c                                                        | 6p21.3         |
| HIST1H2BD | histone cluster 1, H2bd                                                       | 6p22.1         |
| HIST1H3B  | histone cluster 1, H3b                                                        | 6p22.1         |
| HNF1A     | HNF1 homeobox A                                                               | 12q24.31       |
| HRAS      | Harvey rat sarcoma viral oncogene homolog                                     | 11p15.5        |
| ICOSLG    | inducible T-cell co-stimulator ligand                                         | 21q22.3        |
| IDH1      | isocitrate dehydrogenase 1 (NADP+), soluble                                   | 2q34           |
| IDH2      | isocitrate dehydrogenase 2 (NADP+), mitochondrial                             | 15q26.1        |
| IFNGR1    | interferon gamma receptor 1                                                   | 6q23-q24       |
| IGF1      | insulin-like growth factor 1 (somatomedin C)                                  | 12q23.2        |
| IGF1R     | insulin-like growth factor 1 receptor                                         | 15q26.3        |
| IGF2      | insulin-like growth factor 2 (somatomedin A)                                  | 11p15.5        |
| IKBKE     | inhibitor of kappa light polypeptide gene enhancer in B-cells, kinase epsilon | 1q31           |
| IKZF1     | IKAROS family zinc finger 1 (Ikaros)                                          | 7p12.2         |
| IL10      | interleukin 10                                                                | 1q31-q32       |
| IL7R      | interleukin 7 receptor                                                        | 5p13           |
| INPP4A    | inositol polyphosphate-4-phosphatase, type I, 107kDa                          | 2q11.2         |
| INPP4B    | inositol polyphosphate-4-phosphatase, type II, 105kDa                         | 4q31.1         |
| INSR      | insulin receptor                                                              | 19p13.3-p13.2  |
| IRF4      | interferon regulatory factor 4                                                | 6p25-p23       |

|         |                                                                               |                |
|---------|-------------------------------------------------------------------------------|----------------|
| IRS1    | insulin receptor substrate 1                                                  | 2q36           |
| IRS2    | insulin receptor substrate 2                                                  | 13q34          |
| JAG1    | jagged 1                                                                      | 20p12.1-p11.23 |
| JAK1    | Janus kinase 1                                                                | 1p32.3-p31.3   |
| JAK2    | Janus kinase 2                                                                | 9p24           |
| JAK3    | Janus kinase 3                                                                | 19p13-p12      |
| JARID2  | jumonji, AT rich interactive domain 2                                         | 6p24-p23       |
| JUN     | jun proto-oncogene                                                            | 1p32-p31       |
| KAT5    | K(lysine) acetyltransferase 5                                                 | 11q13          |
| KDM5A   | lysine (K)-specific demethylase 5A                                            | 12p13.33       |
| KDM5C   | lysine (K)-specific demethylase 5C                                            | Xp11.22-p11.21 |
| KDM6A   | lysine (K)-specific demethylase 6A                                            | Xp11.2         |
| KDM6B   | lysine (K)-specific demethylase 6B                                            | 17p13.1        |
| KDR     | kinase insert domain receptor (a type III receptor tyrosine kinase)           | 4q11-q12       |
| KEAP1   | kelch-like ECH-associated protein 1                                           | 19p13.2        |
| KIT     | v-kit Hardy-Zuckerman 4 feline sarcoma viral oncogene homolog                 | 4q12           |
| KLF4    | Kruppel-like factor 4 (gut)                                                   | 9q31           |
| KRAS    | Kirsten rat sarcoma viral oncogene homolog                                    | 12p12.1        |
| LATS1   | large tumor suppressor kinase 1                                               | 6q25.1         |
| LATS2   | large tumor suppressor kinase 2                                               | 13q11-q12      |
| LIG4    | ligase IV, DNA, ATP-dependent                                                 | 13q33-q34      |
| LMO1    | LIM domain only 1 (rhombotin 1)                                               | 11p15          |
| MAP2K1  | mitogen-activated protein kinase kinase 1                                     | 15q22.1-q22.33 |
| MAP2K2  | mitogen-activated protein kinase kinase 2                                     | 19p13.3        |
| MAP2K4  | mitogen-activated protein kinase kinase 4                                     | 17p12          |
| MAP3K1  | mitogen-activated protein kinase kinase kinase 1, E3 ubiquitin protein ligase | 5q11.2         |
| MAP3K13 | mitogen-activated protein kinase kinase kinase 13                             | 3q27           |
| MAPK1   | mitogen-activated protein kinase 1                                            | 22q11.2        |
| MAX     | MYC associated factor X                                                       | 14q23          |
| MCL1    | myeloid cell leukemia 1                                                       | 1q21           |
| MCPH1   | microcephalin 1                                                               | 8p23.1         |
| MDC1    | mediator of DNA-damage checkpoint 1                                           | 6p21.3         |
| MDM2    | MDM2 oncogene, E3 ubiquitin protein ligase                                    | 12q13-q14      |
| MDM4    | MDM4, p53 regulator                                                           | 1q32           |
| MED12   | mediator complex subunit 12                                                   | Xq13           |
| MEF2B   | myocyte enhancer factor 2B                                                    | 19p13.11       |
| MEN1    | multiple endocrine neoplasia I                                                | 11q13          |
| MET     | met proto-oncogene                                                            | 7q31           |
| MITF    | microphthalmia-associated transcription factor                                | 3p14.1-p12.3   |
| MLH1    | mutL homolog 1                                                                | 3p22.3         |
| MLL     | lysine (K)-specific methyltransferase 2A                                      | 11q23          |
| MLL2    | lysine (K)-specific methyltransferase 2D                                      | 12q13.12       |
| MLL3    | lysine (K)-specific methyltransferase 2C                                      | 7q36           |
| MPL     | myeloproliferative leukemia virus oncogene                                    | 1p34           |
| MRE11A  | MRE11 meiotic recombination 11 homolog A (S. cerevisiae)                      | 11q21          |
| MSH2    | mutS homolog 2                                                                | 2p21           |
| MSH6    | mutS homolog 6                                                                | 2p16           |
| MTF2    | metal response element binding transcription factor 2                         | 1p22.1         |
| MTOR    | mechanistic target of rapamycin (serine/threonine kinase)                     | 1p36           |
| MUTYH   | mutY homolog                                                                  | 1p34.1         |
| MYC     | v-myc avian myelocytomatosis viral oncogene homolog                           | 8q24           |
| MYCL1   | v-myc avian myelocytomatosis viral oncogene lung carcinoma derived homolog    | 1p34.3         |
| MYCN    | v-myc avian myelocytomatosis viral oncogene neuroblastoma derived homolog     | 2p24.3         |
| MYD88   | myeloid differentiation primary response 88                                   | 3p22           |
| MYOD1   | myogenic differentiation 1                                                    | 11p15          |
| NBN     | nibrin                                                                        | 8q21-q24       |
| NCOR1   | nuclear receptor corepressor 1                                                | 17p11.2        |
| NF1     | neurofibromin 1                                                               | 17q11.2        |
| NF2     | neurofibromin 2 (merlin)                                                      | 22q12.2        |



|         |                                                                                         |               |
|---------|-----------------------------------------------------------------------------------------|---------------|
| NFE2L2  | nuclear factor, erythroid 2-like 2                                                      | 2q31          |
| NKX2-1  | NK2 homeobox 1                                                                          | 14q13.3       |
| NKX3-1  | NK3 homeobox 1                                                                          | 8p21.2        |
| NOTCH1  | notch 1                                                                                 | 9q34.3        |
| NOTCH2  | notch 2                                                                                 | 1p13-p11      |
| NOTCH3  | notch 3                                                                                 | 19p13.2-p13.1 |
| NOTCH4  | notch 4                                                                                 | 6p21.3        |
| NPM1    | nucleophosmin (nucleolar phosphoprotein B23, numatrin)                                  | 5q35.1        |
| NRAS    | neuroblastoma RAS viral (v-ras) oncogene homolog                                        | 1p13.2        |
| NSD1    | nuclear receptor binding SET domain protein 1                                           | 5q35          |
| NTRK1   | neurotrophic tyrosine kinase, receptor, type 1                                          | 1q21-q22      |
| NTRK2   | neurotrophic tyrosine kinase, receptor, type 2                                          | 9q22.1        |
| NTRK3   | neurotrophic tyrosine kinase, receptor, type 3                                          | 15q24-q25     |
| PAK1    | p21 protein (Cdc42/Rac)-activated kinase 1                                              | 11q13-q14     |
| PAK7    | p21 protein (Cdc42/Rac)-activated kinase 7                                              | 20p12         |
| PALB2   | partner and localizer of BRCA2                                                          | 16p12.1       |
| PARK2   | parkin RBR E3 ubiquitin protein ligase                                                  | 6q25.2-q27    |
| PARP1   | poly (ADP-ribose) polymerase 1                                                          | 1q41-q42      |
| PAX5    | paired box 5                                                                            | 9p13.2        |
| PBRM1   | polybromo 1                                                                             | 3p21          |
| PDCD1   | programmed cell death 1                                                                 | 2q37.3        |
| PDGFRA  | platelet-derived growth factor receptor, alpha polypeptide                              | 4q12          |
| PDGFRB  | platelet-derived growth factor receptor, beta polypeptide                               | 5q33.1        |
| PDPK1   | 3-phosphoinositide dependent protein kinase 1                                           | 16p13.3       |
| PHF1    | PHD finger protein 1                                                                    | 6p21.3        |
| PHF19   | PHD finger protein 19                                                                   | 9q34.11       |
| PHOX2B  | paired-like homeobox 2b                                                                 | 4p13          |
| PIK3C2G | phosphatidylinositol-4-phosphate 3-kinase, catalytic subunit type 2 gamma               | 12p12         |
| PIK3C3  | phosphatidylinositol 3-kinase, catalytic subunit type 3                                 | 18q12.3       |
| PIK3CA  | phosphatidylinositol-4,5-bisphosphate 3-kinase, catalytic subunit alpha                 | 3q26.3        |
| PIK3CB  | phosphatidylinositol-4,5-bisphosphate 3-kinase, catalytic subunit beta                  | 3q22.3        |
| PIK3CD  | phosphatidylinositol-4,5-bisphosphate 3-kinase, catalytic subunit delta                 | 1p36.2        |
| PIK3CG  | phosphatidylinositol-4,5-bisphosphate 3-kinase, catalytic subunit gamma                 | 7q22          |
| PIK3R1  | phosphoinositide-3-kinase, regulatory subunit 1 (alpha)                                 | 5q13.1        |
| PIK3R2  | phosphoinositide-3-kinase, regulatory subunit 2 (beta)                                  | 19p13.11      |
| PIK3R3  | phosphoinositide-3-kinase, regulatory subunit 3 (gamma)                                 | 1p34.1        |
| PIM1    | pim-1 oncogene                                                                          | 6p21          |
| PLEKHG2 | pleckstrin homology domain containing, family G (with RhoGef domain) member 2           | 19q13.2       |
| PLK2    | polo-like kinase 2                                                                      | 5q12.1-q13.2  |
| PMAIP1  | phorbol-12-myristate-13-acetate-induced protein 1                                       | 18q21.32      |
| PMS1    | PMS1 postmeiotic segregation increased 1 ( <i>S. cerevisiae</i> )                       | 2q31-q33      |
| PMS2    | PMS2 postmeiotic segregation increased 2 ( <i>S. cerevisiae</i> )                       | 7p22.1        |
| PNRC1   | proline-rich nuclear receptor coactivator 1                                             | 6q16.1        |
| POLE    | polymerase (DNA directed), epsilon, catalytic subunit                                   | 12q24.3       |
| POLQ    | polymerase (DNA directed), theta                                                        | 3q13.3        |
| PPP2R1A | protein phosphatase 2, regulatory subunit A, alpha                                      | 19q13         |
| PRDM1   | PR domain containing 1, with ZNF domain                                                 | 6q21          |
| PRKAR1A | protein kinase, cAMP-dependent, regulatory, type I, alpha                               | 17q24.2       |
| PRKDC   | protein kinase, DNA-activated, catalytic polypeptide                                    | 8q11          |
| PTCH1   | patched 1                                                                               | 9q22.1-q31    |
| PTEN    | phosphatase and tensin homolog                                                          | 10q23         |
| PTPN11  | protein tyrosine phosphatase, non-receptor type 11                                      | 12q24.1       |
| PTPRD   | protein tyrosine phosphatase, receptor type, D                                          | 9p24.1-p23    |
| PTPRS   | protein tyrosine phosphatase, receptor type, S                                          | 19p13.3       |
| RAC1    | ras-related C3 botulinum toxin substrate 1 (rho family, small GTP binding protein Rac1) | 7p22          |
| RAD50   | RAD50 homolog ( <i>S. cerevisiae</i> )                                                  | 5q23-q31      |
| RAD51   | RAD51 recombinase                                                                       | 15q15.1       |
| RAD51B  | RAD51 paralog B                                                                         | 14q23-q24.2   |
| RAD51C  | RAD51 paralog C                                                                         | 17q25.1       |

|         |                                                                                          |              |
|---------|------------------------------------------------------------------------------------------|--------------|
| RAD51D  | RAD51 paralogue D                                                                        | 17q11        |
| RAD52   | RAD52 homolog ( <i>S. cerevisiae</i> )                                                   | 12p13-p12.2  |
| RAD54L  | RAD54-like ( <i>S. cerevisiae</i> )                                                      | 1p32         |
| RAF1    | v-raf-1 murine leukemia viral oncogene homolog 1                                         | 3p25         |
| RARA    | retinoic acid receptor, alpha                                                            | 17q21.1      |
| RASA1   | RAS p21 protein activator (GTPase activating protein) 1                                  | 5q13         |
| RB1     | retinoblastoma 1                                                                         | 13q14.2      |
| RBM10   | RNA binding motif protein 10                                                             | Xp11.3       |
| RECQL4  | RecQ protein-like 4                                                                      | 8q24.3       |
| REL     | v-rel avian reticuloendotheliosis viral oncogene homolog                                 | 2p13-p12     |
| RET     | ret proto-oncogene                                                                       | 10q11.2      |
| REV3L   | REV3-like, polymerase (DNA directed), zeta, catalytic subunit                            | 6q22         |
| RFWD2   | ring finger and WD repeat domain 2, E3 ubiquitin protein ligase                          | 1q25.1-q25.2 |
| RHOA    | ras homolog family member A                                                              | 3p21.3       |
| RICTOR  | RPTOR independent companion of MTOR, complex 2                                           | 5p13.1       |
| RIT1    | Ras-like without CAAX 1                                                                  | 1q21.2       |
| RNF43   | ring finger protein 43                                                                   | 17q23.2      |
| ROS1    | c-ros oncogene 1, receptor tyrosine kinase                                               | 6q21-q22     |
| RPS6KA4 | ribosomal protein S6 kinase, 90kDa, polypeptide 4                                        | 11q11-q13    |
| RPS6KB2 | ribosomal protein S6 kinase, 70kDa, polypeptide 2                                        | 11q13.1      |
| RPTOR   | regulatory associated protein of MTOR, complex 1                                         | 17q25.3      |
| RUNX1   | runt-related transcription factor 1                                                      | 21q22.3      |
| RYBP    | RING1 and YY1 binding protein                                                            | 3p14.2       |
| SDHA    | succinate dehydrogenase complex, subunit A, flavoprotein (Fp)                            | 5p15         |
| SDHAF2  | succinate dehydrogenase complex assembly factor 2                                        | 11q12.2      |
| SDHB    | succinate dehydrogenase complex, subunit B, iron sulfur (Ip)                             | 1p36.1-p35   |
| SDHC    | succinate dehydrogenase complex, subunit C, integral membrane protein, 15kDa             | 1q23.3       |
| SDHD    | succinate dehydrogenase complex, subunit D, integral membrane protein                    | 11q23        |
| SETD2   | SET domain containing 2                                                                  | 3p21.31      |
| SF3B1   | splicing factor 3b, subunit 1, 155kDa                                                    | 2q33.1       |
| SH2D1A  | SH2 domain containing 1A                                                                 | Xq25         |
| SHQ1    | SHQ1, H/ACA ribonucleoprotein assembly factor                                            | 3p13         |
| SLX4    | SLX4 structure-specific endonuclease subunit                                             | 16p13.3      |
| SMAD2   | SMAD family member 2                                                                     | 18q21        |
| SMAD3   | SMAD family member 3                                                                     | 15q21-q22    |
| SMAD4   | SMAD family member 4                                                                     | 18q21.1      |
| SMARCA4 | SWI/SNF related, matrix associated, actin dependent regulator of chromatin, subfamily a, | 19p13.3      |
| SMARCB1 | SWI/SNF related, matrix associated, actin dependent regulator of chromatin, subfamily b, | 22q11.23     |
| SMARCD1 | SWI/SNF related, matrix associated, actin dependent regulator of chromatin, subfamily d, | 12q13-q14    |
| SMO     | smoothened, frizzled class receptor                                                      | 7q32.1       |
| SOCS1   | suppressor of cytokine signaling 1                                                       | 16p13.13     |
| SOX17   | SRY (sex determining region Y)-box 17                                                    | 8q11.23      |
| SOX2    | SRY (sex determining region Y)-box 2                                                     | 3q26.3-q27   |
| SOX9    | SRY (sex determining region Y)-box 9                                                     | 17q24.3      |
| SPEN    | spen family transcriptional repressor                                                    | 1p36         |
| SPOP    | speckle-type POZ protein                                                                 | 17q21.33     |
| SRC     | v-src avian sarcoma (Schmidt-Ruppin A-2) viral oncogene homolog                          | 20q12-q13    |
| STAG2   | stromal antigen 2                                                                        | Xq25         |
| STK11   | serine/threonine kinase 11                                                               | 19p13.3      |
| STK40   | serine/threonine kinase 40                                                               | 1p34.3       |
| SUFU    | suppressor of fused homolog ( <i>Drosophila</i> )                                        | 10q24.32     |
| SUZ12   | SUZ12 polycomb repressive complex 2 subunit                                              | 17q21        |
| SYK     | spleen tyrosine kinase                                                                   | 9q22         |
| TBX3    | T-box 3                                                                                  | 12q24.21     |
| TERT    | telomerase reverse transcriptase                                                         | 5p15.33      |
| TET1    | tet methylcytosine dioxygenase 1                                                         | 10q21        |
| TET2    | tet methylcytosine dioxygenase 2                                                         | 4q24         |
| TGFBR1  | transforming growth factor, beta receptor 1                                              | 9q22         |
| TGFBR2  | transforming growth factor, beta receptor II (70/80kDa)                                  | 3p22         |

|          |                                                                                          |                 |
|----------|------------------------------------------------------------------------------------------|-----------------|
| TMEM127  | transmembrane protein 127                                                                | 2q11.2          |
| TMPRSS2  | transmembrane protease, serine 2                                                         | 21q22.3         |
| TNFAIP3  | tumor necrosis factor, alpha-induced protein 3                                           | 6q23-q25        |
| TNFRSF14 | tumor necrosis factor receptor superfamily, member 14                                    | 1p36.32         |
| TOP1     | topoisomerase (DNA) I                                                                    | 20q12-q13.1     |
| TP53     | tumor protein p53                                                                        | 17p13.1         |
| TP63     | tumor protein p63                                                                        | 3q27-q29        |
| TRAF7    | TNF receptor-associated factor 7, E3 ubiquitin protein ligase                            | 16p13.3         |
| TSC1     | tuberous sclerosis 1                                                                     | 9q34            |
| TSC2     | tuberous sclerosis 2                                                                     | 16p13.3         |
| TSHR     | thyroid stimulating hormone receptor                                                     | 14q24-q31       |
| U2AF1    | U2 small nuclear RNA auxiliary factor 1                                                  | 21q22.3         |
| VHL      | von Hippel-Lindau tumor suppressor, E3 ubiquitin protein ligase                          | 3p25.3          |
| VTCN1    | V-set domain containing T cell activation inhibitor 1                                    | 1p12            |
| WRN      | Werner syndrome, RecQ helicase-like                                                      | 8p12            |
| WT1      | Wilms tumor 1                                                                            | 11p13           |
| XIAP     | X-linked inhibitor of apoptosis                                                          | Xq25            |
| XPO1     | exportin 1                                                                               | 2p15            |
| XRCC1    | X-ray repair complementing defective repair in Chinese hamster cells 1                   | 19q13.2         |
| XRCC2    | X-ray repair complementing defective repair in Chinese hamster cells 2                   | 7q36            |
| XRCC4    | X-ray repair complementing defective repair in Chinese hamster cells 4                   | 5q14.2          |
| XRCC5    | X-ray repair complementing defective repair in Chinese hamster cells 5 (double-strand-br | 2q35            |
| XRCC6    | X-ray repair complementing defective repair in Chinese hamster cells 6                   | 22q13.2         |
| YAP1     | Yes-associated protein 1                                                                 | 11q13           |
| YES1     | v-yes-1 Yamaguchi sarcoma viral oncogene homolog 1                                       | 18p11.31-p11.21 |

**Supplementary Table 5: Expression of genes differentially expressed between PRC2 intact and PRC2 loss**

| Sample         | Mean PRC2 Loss | Mean PRC2 Intact | Fold Change (Log 2) | FDR      |
|----------------|----------------|------------------|---------------------|----------|
| PITX1          | 855            | 2                | 8.20                | 2.91E-86 |
| EYA1           | 3064           | 10               | 7.82                | 6.22E-63 |
| NXPH2          | 181            | 0                | 7.61                | 3.23E-27 |
| HMX1           | 278            | 1                | 7.39                | 8.59E-41 |
| CACNG7         | 1229           | 3                | 7.34                | 1.65E-31 |
| OTX2           | 734            | 2                | 7.00                | 5.97E-26 |
| OLFM3          | 1281           | 6                | 6.96                | 2.93E-32 |
| LGR5           | 2905           | 14               | 6.95                | 4.90E-36 |
| TNMD           | 12037          | 37               | 6.74                | 1.10E-23 |
| DLK1           | 93096          | 193              | 6.72                | 1.00E-20 |
| DPY19L2P1      | 408            | 3                | 6.67                | 6.35E-32 |
| BPIFB4         | 4796           | 10               | 6.64                | 1.05E-19 |
| PAPPA2         | 2448           | 16               | 6.60                | 2.53E-40 |
| PAX7           | 700            | 4                | 6.35                | 1.69E-22 |
| NPY5R          | 115            | 0                | 6.11                | 5.77E-16 |
| KCTD8          | 159            | 1                | 6.10                | 5.41E-27 |
| RP11-1102P16.1 | 157            | 2                | 6.09                | 5.30E-26 |
| FEZF1          | 222            | 1                | 6.05                | 3.50E-20 |
| FOXP4          | 84             | 1                | 6.03                | 1.45E-19 |
| HOXD11         | 180            | 1                | 6.02                | 1.79E-17 |
| SALL3          | 329            | 2                | 5.99                | 7.87E-17 |
| LIN28B         | 231            | 1                | 5.97                | 2.46E-17 |
| UNC13C         | 178            | 2                | 5.93                | 5.37E-26 |
| PROK2          | 255            | 3                | 5.92                | 2.05E-25 |
| CXCL6          | 626            | 4                | 5.90                | 1.44E-17 |
| TMEM179        | 99             | 1                | 5.89                | 6.65E-21 |
| EPHA7          | 1113           | 10               | 5.86                | 3.39E-25 |
| RP11-849I19.1  | 199            | 1                | 5.82                | 1.97E-14 |
| C1QL4          | 1864           | 25               | 5.80                | 2.39E-33 |
| GAS2           | 5955           | 98               | 5.79                | 8.36E-61 |
| RP6-24A23.7    | 208            | 1                | 5.79                | 1.41E-14 |
| RP1-170O19.14  | 40             | 0                | 5.74                | 2.09E-18 |
| FOXE1          | 202            | 2                | 5.71                | 1.51E-16 |
| ALDH1A2        | 7847           | 65               | 5.71                | 8.44E-19 |
| LMX1A          | 225            | 2                | 5.65                | 5.45E-14 |
| CLVS2          | 68             | 0                | 5.65                | 2.42E-16 |
| RP1-170O19.17  | 51             | 0                | 5.63                | 5.52E-14 |
| RP11-966I7.1   | 37             | 0                | 5.56                | 4.22E-17 |
| SELV           | 45             | 0                | 5.55                | 3.40E-19 |
| RP11-366M4.3   | 710            | 6                | 5.49                | 2.05E-14 |
| SYT13          | 597            | 7                | 5.47                | 8.26E-16 |

|               |      |     |      |          |
|---------------|------|-----|------|----------|
| RP11-160A10.2 | 63   | 0   | 5.42 | 3.79E-14 |
| ZNF804B       | 138  | 2   | 5.39 | 1.33E-13 |
| ALX4          | 1249 | 14  | 5.39 | 2.97E-16 |
| EMX1          | 188  | 3   | 5.38 | 3.61E-15 |
| ALX3          | 40   | 0   | 5.34 | 2.18E-10 |
| ANKRD18B      | 139  | 2   | 5.25 | 1.11E-16 |
| ACO26150.5    | 22   | 0   | 5.23 | 2.08E-10 |
| RORB          | 245  | 6   | 5.23 | 4.59E-26 |
| NPW           | 1058 | 19  | 5.22 | 2.13E-21 |
| RP11-99H20.1  | 33   | 0   | 5.17 | 1.30E-09 |
| HOXA13        | 1300 | 29  | 5.11 | 7.63E-21 |
| EMX2          | 288  | 7   | 5.06 | 7.33E-21 |
| BTBD17        | 58   | 0   | 5.06 | 8.48E-11 |
| GPC5          | 64   | 1   | 5.06 | 3.26E-15 |
| FAM123A       | 38   | 2   | 5.01 | 6.47E-14 |
| EVX1-AS       | 24   | 0   | 4.99 | 6.08E-10 |
| LHX9          | 674  | 13  | 4.99 | 1.02E-16 |
| UGT3A2        | 199  | 4   | 4.99 | 4.01E-13 |
| RP11-510C10.4 | 43   | 0   | 4.99 | 6.26E-10 |
| ZIC2          | 421  | 5   | 4.98 | 8.49E-13 |
| ZFHX4-AS1     | 1399 | 26  | 4.98 | 1.27E-15 |
| TBR1          | 452  | 4   | 4.97 | 2.81E-10 |
| GPR64         | 1717 | 43  | 4.97 | 8.83E-32 |
| AC116614.1    | 95   | 2   | 4.97 | 1.65E-11 |
| RP5-1121E10.2 | 13   | 0   | 4.94 | 8.47E-09 |
| JPH4          | 1480 | 30  | 4.94 | 8.37E-20 |
| CNNM1         | 270  | 6   | 4.92 | 1.95E-15 |
| MRPL9P1       | 36   | 0   | 4.90 | 5.91E-09 |
| CA10          | 634  | 6   | 4.89 | 2.11E-09 |
| WIF1          | 6516 | 110 | 4.88 | 1.03E-11 |
| GABRA5        | 144  | 2   | 4.88 | 8.02E-10 |
| SCAND3        | 389  | 11  | 4.86 | 5.01E-22 |
| NPY1R         | 1146 | 35  | 4.83 | 8.08E-17 |
| KRT25         | 31   | 0   | 4.81 | 2.11E-08 |
| SLC16A9       | 1689 | 41  | 4.80 | 7.89E-17 |
| CYP26A1       | 1027 | 24  | 4.79 | 7.58E-17 |
| MUM1L1        | 594  | 16  | 4.79 | 8.44E-19 |
| DBX2          | 72   | 2   | 4.78 | 6.79E-12 |
| RP11-343B18.2 | 42   | 0   | 4.77 | 1.16E-08 |
| ADCY2         | 947  | 19  | 4.75 | 3.76E-13 |
| CRYGD         | 125  | 1   | 4.73 | 2.56E-08 |
| SLC15A1       | 40   | 1   | 4.73 | 2.03E-12 |
| LYPD6B        | 186  | 6   | 4.71 | 9.26E-25 |
| GLT1D1        | 213  | 8   | 4.68 | 9.45E-24 |
| PLEKHG4B      | 1540 | 33  | 4.68 | 2.32E-13 |
| DDIT4L        | 2093 | 55  | 4.67 | 1.77E-17 |
| EMX2OS        | 98   | 2   | 4.65 | 1.60E-16 |

|                |       |     |      |          |
|----------------|-------|-----|------|----------|
| SLC9A2         | 277   | 8   | 4.63 | 2.26E-13 |
| FADS6          | 21    | 1   | 4.62 | 3.34E-10 |
| ZIC5           | 33    | 2   | 4.61 | 3.75E-11 |
| GPR50          | 31    | 1   | 4.61 | 2.57E-09 |
| SH3GL2         | 109   | 4   | 4.58 | 9.44E-19 |
| SNX18P7        | 13    | 0   | 4.58 | 1.77E-07 |
| STMN2          | 1756  | 33  | 4.56 | 1.11E-09 |
| RP11-255A11.21 | 33    | 1   | 4.51 | 7.59E-08 |
| CDX2           | 199   | 4   | 4.50 | 1.09E-08 |
| RBM24          | 728   | 18  | 4.49 | 4.05E-11 |
| CNPY1          | 205   | 5   | 4.49 | 1.77E-08 |
| HOTTIP         | 64    | 3   | 4.49 | 1.47E-10 |
| POU4F1         | 259   | 7   | 4.47 | 1.14E-10 |
| ESX1           | 14    | 0   | 4.47 | 6.78E-07 |
| BTBD11         | 1062  | 41  | 4.47 | 1.10E-16 |
| MAGEL2         | 25    | 0   | 4.44 | 4.71E-07 |
| CDH8           | 415   | 12  | 4.43 | 3.52E-14 |
| ARHGEF4        | 2198  | 61  | 4.43 | 1.05E-12 |
| RP5-1024C24.1  | 46    | 3   | 4.42 | 2.40E-13 |
| PNMT           | 121   | 4   | 4.41 | 3.12E-10 |
| DSC3           | 293   | 6   | 4.39 | 1.65E-09 |
| PNMA3          | 675   | 25  | 4.39 | 1.34E-20 |
| HS3ST3A1       | 401   | 14  | 4.39 | 1.54E-16 |
| SLC8A2         | 325   | 11  | 4.38 | 1.64E-11 |
| HMX2           | 38    | 1   | 4.37 | 6.37E-11 |
| LIX1           | 159   | 3   | 4.37 | 2.83E-09 |
| NTRK2          | 3006  | 87  | 4.36 | 3.76E-12 |
| ATP1A2         | 3075  | 77  | 4.36 | 1.14E-10 |
| MYOD1          | 615   | 8   | 4.36 | 3.97E-07 |
| CCK            | 91    | 2   | 4.34 | 1.44E-07 |
| IRS4           | 49    | 1   | 4.32 | 7.59E-08 |
| COL11A2        | 12250 | 450 | 4.30 | 2.07E-09 |
| COL2A1         | 8863  | 177 | 4.28 | 9.85E-08 |
| AC010729.1     | 23    | 1   | 4.28 | 2.76E-10 |
| DPY19L2P4      | 195   | 10  | 4.24 | 3.92E-08 |
| RP11-326E22.1  | 15    | 0   | 4.24 | 7.44E-08 |
| CDH10          | 277   | 5   | 4.24 | 1.46E-07 |
| WNK2           | 725   | 23  | 4.23 | 7.93E-11 |
| AC091878.1     | 39    | 2   | 4.23 | 3.58E-11 |
| CHRNA7         | 71    | 2   | 4.23 | 7.42E-18 |
| FAM19A4        | 91    | 2   | 4.22 | 1.76E-07 |
| DBC1           | 785   | 10  | 4.21 | 1.54E-06 |
| RP11-35O15.1   | 32    | 1   | 4.20 | 3.12E-10 |
| CTD-2231H16.1  | 81    | 4   | 4.20 | 6.72E-12 |
| ANKRD18A       | 327   | 10  | 4.19 | 2.76E-09 |
| PCDHA1         | 50    | 2   | 4.18 | 1.29E-08 |
| JPH1           | 1668  | 70  | 4.17 | 1.83E-17 |

|                  |        |      |      |          |
|------------------|--------|------|------|----------|
| CXCL5            | 353    | 8    | 4.13 | 5.21E-07 |
| FEZF1-AS1        | 352    | 8    | 4.12 | 2.55E-07 |
| RP11-260M19.2    | 30     | 1    | 4.12 | 6.32E-09 |
| RIMS4            | 604    | 14   | 4.11 | 2.39E-07 |
| PRRT4            | 571    | 21   | 4.11 | 1.57E-11 |
| CTD-2195M15.1    | 24     | 1    | 4.10 | 3.96E-10 |
| C14orf144        | 61     | 3    | 4.10 | 8.44E-09 |
| KCNH2            | 889    | 33   | 4.09 | 3.31E-10 |
| CRYM             | 1037   | 32   | 4.09 | 5.52E-09 |
| RASL11B          | 3416   | 153  | 4.08 | 1.46E-15 |
| C1QTNF3          | 7542   | 347  | 4.08 | 1.59E-17 |
| GPR88            | 170    | 8    | 4.07 | 1.96E-14 |
| SIX2             | 2713   | 82   | 4.06 | 4.20E-08 |
| HOXA11-AS        | 433    | 21   | 4.06 | 6.07E-21 |
| FAM150B          | 387    | 14   | 4.05 | 2.64E-09 |
| NEFM             | 2353   | 80   | 4.05 | 1.71E-08 |
| RIMBP2           | 434    | 21   | 4.04 | 9.32E-12 |
| DLX3             | 678    | 21   | 4.03 | 3.15E-08 |
| NHLH2            | 190    | 5    | 4.03 | 7.89E-07 |
| FAM189A1         | 183    | 7    | 4.02 | 2.76E-09 |
| RP11-495K9.3     | 46     | 2    | 4.00 | 1.98E-06 |
| SCXA             | 13     | 1    | 3.99 | 2.33E-08 |
| USH1G            | 68     | 4    | 3.99 | 2.95E-08 |
| ESRRG            | 248    | 9    | 3.99 | 2.56E-08 |
| TLX1             | 280    | 6    | 3.98 | 4.62E-06 |
| MSGN1            | 8      | 0    | 3.98 | 2.34E-05 |
| FAM163B          | 51     | 1    | 3.98 | 8.93E-08 |
| GAS1             | 5357   | 255  | 3.96 | 4.45E-15 |
| GNAT1            | 9      | 0    | 3.96 | 3.52E-05 |
| LHX8             | 530    | 20   | 3.96 | 2.55E-08 |
| PAX2             | 347    | 10   | 3.96 | 9.64E-07 |
| HIF3A            | 6179   | 180  | 3.96 | 2.85E-07 |
| NUDT10           | 428    | 18   | 3.95 | 4.39E-10 |
| ANKRD62P1-PARP4I | 10     | 1    | 3.95 | 2.74E-06 |
| SIAH3            | 94     | 4    | 3.94 | 3.40E-08 |
| ASIC2            | 393    | 11   | 3.94 | 1.35E-06 |
| CACNA1G-AS1      | 191    | 7    | 3.94 | 3.47E-08 |
| AP001626.2       | 50     | 2    | 3.93 | 3.24E-07 |
| ADRB2            | 2008   | 91   | 3.93 | 2.46E-11 |
| TPTEP1           | 1718   | 87   | 3.92 | 6.94E-12 |
| IGF2             | 112231 | 2668 | 3.90 | 4.20E-06 |
| SIM1             | 706    | 21   | 3.90 | 6.67E-07 |
| CACNA1G          | 4217   | 139  | 3.90 | 1.56E-07 |
| PRR18            | 85     | 4    | 3.89 | 5.67E-08 |
| ENTPD8           | 135    | 8    | 3.88 | 8.38E-09 |
| FBN3             | 1188   | 46   | 3.88 | 3.52E-08 |
| USH1C            | 681    | 21   | 3.88 | 9.15E-06 |

|                  |       |      |      |          |
|------------------|-------|------|------|----------|
| SH3GL3           | 227   | 12   | 3.88 | 2.33E-08 |
| CNTN2            | 243   | 10   | 3.87 | 1.65E-07 |
| NCAN             | 74    | 3    | 3.87 | 1.33E-08 |
| GPR27            | 623   | 26   | 3.87 | 6.09E-09 |
| YBX2             | 318   | 17   | 3.87 | 4.72E-10 |
| XXbac-BPG308K3.5 | 6     | 0    | 3.87 | 5.39E-05 |
| RP4-755D9.1      | 225   | 10   | 3.87 | 7.22E-10 |
| GRM4             | 409   | 12   | 3.86 | 4.31E-06 |
| LEMD1            | 149   | 7    | 3.86 | 5.94E-09 |
| RP11-247C2.2     | 233   | 11   | 3.86 | 1.99E-11 |
| GREB1L           | 246   | 11   | 3.86 | 1.16E-08 |
| MFAP4            | 29792 | 1141 | 3.84 | 7.88E-08 |
| BEGAIN           | 988   | 45   | 3.82 | 1.66E-09 |
| GALNT14          | 880   | 57   | 3.82 | 4.60E-14 |
| RP11-964E11.2    | 35    | 1    | 3.81 | 3.31E-05 |
| KIAA2022         | 116   | 5    | 3.81 | 3.24E-08 |
| RP11-944C7.1     | 10    | 0    | 3.81 | 6.19E-05 |
| VGLL2            | 203   | 6    | 3.81 | 1.51E-06 |
| AC008063.2       | 27    | 2    | 3.80 | 8.13E-06 |
| WNT3A            | 144   | 7    | 3.80 | 5.01E-08 |
| FAM65C           | 1648  | 72   | 3.80 | 7.96E-09 |
| CTD-2124B20.3    | 9     | 0    | 3.80 | 1.01E-04 |
| KCNMB2           | 305   | 18   | 3.79 | 1.74E-10 |
| CNTNAP3          | 343   | 12   | 3.79 | 1.09E-06 |
| LRFN2            | 43    | 2    | 3.79 | 7.70E-07 |
| C14orf23         | 51    | 3    | 3.78 | 3.25E-07 |
| MYL3             | 199   | 9    | 3.78 | 2.03E-09 |
| CPAMD8           | 1751  | 72   | 3.77 | 6.64E-08 |
| EFNA2            | 461   | 20   | 3.76 | 2.67E-07 |
| PART1            | 123   | 8    | 3.75 | 6.47E-08 |
| LINC00626        | 53    | 3    | 3.75 | 5.27E-07 |
| CHODL            | 1532  | 58   | 3.75 | 6.58E-07 |
| MST4             | 3098  | 218  | 3.74 | 2.47E-17 |
| AC140481.7       | 11    | 0    | 3.74 | 7.97E-05 |
| SLC1A6           | 139   | 6    | 3.74 | 3.98E-06 |
| SCUBE1           | 413   | 18   | 3.72 | 3.41E-07 |
| HS6ST2           | 771   | 36   | 3.71 | 3.31E-07 |
| TCF24            | 64    | 4    | 3.71 | 3.46E-11 |
| ZNF423           | 1909  | 100  | 3.71 | 4.94E-11 |
| COL13A1          | 4588  | 295  | 3.70 | 9.93E-09 |
| PTPRD            | 4140  | 197  | 3.70 | 2.06E-08 |
| RP1-177G6.2      | 336   | 14   | 3.70 | 1.24E-06 |
| SLC7A10          | 564   | 25   | 3.69 | 4.34E-07 |
| DLX4             | 1245  | 57   | 3.68 | 4.79E-08 |
| MSX1             | 2299  | 129  | 3.68 | 5.03E-12 |
| CDH22            | 72    | 5    | 3.68 | 3.15E-07 |
| FAHD2P1          | 10    | 0    | 3.67 | 9.72E-05 |



|               |      |     |      |          |
|---------------|------|-----|------|----------|
| NOL4          | 24   | 1   | 3.67 | 1.60E-06 |
| GS1-421I3.2   | 9    | 1   | 3.66 | 3.74E-05 |
| RP11-384O8.1  | 46   | 2   | 3.66 | 2.43E-08 |
| FGF12         | 438  | 27  | 3.65 | 2.46E-12 |
| TMEM196       | 110  | 7   | 3.65 | 3.34E-06 |
| RP11-495K9.6  | 13   | 0   | 3.65 | 1.57E-04 |
| ACTN2         | 620  | 41  | 3.64 | 1.54E-13 |
| AC008060.8    | 22   | 1   | 3.63 | 7.84E-06 |
| IQSEC3        | 1100 | 45  | 3.62 | 3.52E-06 |
| RP11-354A14.1 | 6    | 0   | 3.62 | 4.30E-05 |
| SNAP91        | 130  | 6   | 3.61 | 4.94E-06 |
| GAL3ST3       | 76   | 4   | 3.61 | 1.41E-06 |
| RP11-171A24.3 | 6    | 0   | 3.61 | 3.22E-05 |
| EVX1          | 39   | 4   | 3.60 | 2.49E-06 |
| PPP2R2C       | 218  | 11  | 3.59 | 1.42E-06 |
| MAPK4         | 188  | 10  | 3.59 | 7.47E-07 |
| RP11-359N11.2 | 14   | 1   | 3.59 | 2.16E-05 |
| GPR20         | 129  | 5   | 3.57 | 2.24E-06 |
| ACAN          | 5023 | 206 | 3.56 | 6.12E-06 |
| PROKR2        | 44   | 2   | 3.56 | 6.43E-05 |
| AC018730.3    | 7    | 1   | 3.56 | 9.72E-05 |
| CENPVP3       | 5    | 0   | 3.55 | 3.86E-04 |
| EN1           | 624  | 30  | 3.55 | 9.89E-07 |
| RP11-538I12.3 | 9    | 1   | 3.54 | 1.18E-04 |
| HMGCLL1       | 556  | 31  | 3.54 | 2.62E-05 |
| PTH1R         | 2647 | 154 | 3.53 | 9.45E-09 |
| HS3ST6        | 27   | 1   | 3.53 | 9.72E-05 |
| MPPED2        | 1103 | 77  | 3.52 | 5.78E-14 |
| RP11-527L4.2  | 7    | 0   | 3.52 | 9.53E-05 |
| HOXC-AS5      | 79   | 4   | 3.52 | 5.35E-09 |
| GPR143        | 274  | 12  | 3.51 | 6.74E-06 |
| SLC25A48      | 150  | 8   | 3.50 | 3.52E-06 |
| CA12          | 2547 | 158 | 3.50 | 3.48E-08 |
| AC009236.2    | 7    | 0   | 3.50 | 2.67E-05 |
| DUSP9         | 340  | 19  | 3.49 | 2.75E-06 |
| ASTN1         | 1129 | 46  | 3.49 | 2.45E-05 |
| OXGR1         | 45   | 4   | 3.48 | 1.57E-08 |
| PLAG1         | 2952 | 206 | 3.47 | 3.67E-10 |
| RP11-649A16.1 | 52   | 3   | 3.47 | 3.88E-06 |
| AC025627.7    | 23   | 2   | 3.47 | 3.25E-07 |
| AC068057.1    | 7    | 0   | 3.47 | 7.06E-04 |
| CLPSL2        | 16   | 1   | 3.47 | 2.14E-04 |
| MTNR1A        | 8    | 0   | 3.47 | 3.87E-05 |
| RP6-24A23.3   | 34   | 2   | 3.47 | 6.91E-07 |
| MCF2          | 144  | 8   | 3.47 | 1.40E-06 |
| CTA-150C2.13  | 53   | 2   | 3.47 | 3.49E-05 |
| RP1-104O17.3  | 5    | 0   | 3.46 | 5.79E-04 |

|               |      |     |      |          |
|---------------|------|-----|------|----------|
| CACNG8        | 435  | 24  | 3.45 | 1.04E-06 |
| IGLON5        | 630  | 35  | 3.45 | 1.24E-06 |
| CTD-2330J20.2 | 5    | 0   | 3.45 | 6.25E-04 |
| MSX2          | 682  | 31  | 3.42 | 2.34E-05 |
| ZIC1          | 4587 | 332 | 3.42 | 3.18E-09 |
| RP11-966I7.2  | 32   | 3   | 3.42 | 4.60E-06 |
| MSX2P1        | 19   | 1   | 3.42 | 2.55E-04 |
| BCL11A        | 543  | 46  | 3.42 | 2.49E-12 |
| HOXB-AS5      | 217  | 9   | 3.42 | 2.97E-04 |
| BPIFB3        | 15   | 2   | 3.41 | 6.94E-05 |
| SNTG2         | 60   | 5   | 3.41 | 1.04E-07 |
| UNC93B2       | 6    | 0   | 3.41 | 9.20E-04 |
| CAMKV         | 86   | 7   | 3.41 | 2.46E-13 |
| RP11-364B14.3 | 31   | 1   | 3.41 | 2.71E-04 |
| GDA           | 119  | 9   | 3.40 | 6.99E-06 |
| C7orf62       | 5    | 0   | 3.40 | 8.84E-04 |
| RP11-844P9.2  | 81   | 9   | 3.40 | 1.34E-07 |
| GDF7          | 145  | 11  | 3.40 | 4.61E-08 |
| PWRN1         | 62   | 2   | 3.39 | 3.55E-04 |
| SLC6A11       | 53   | 4   | 3.38 | 2.67E-05 |
| HS6ST3        | 6    | 0   | 3.38 | 9.84E-04 |
| DSG2          | 1547 | 91  | 3.38 | 2.58E-06 |
| AP001092.4    | 27   | 2   | 3.37 | 1.05E-05 |
| LANCL3        | 129  | 10  | 3.37 | 1.03E-11 |
| IRX4          | 155  | 8   | 3.37 | 6.28E-05 |
| CYTL1         | 9736 | 590 | 3.37 | 4.76E-06 |
| MAB21L1       | 1601 | 101 | 3.37 | 1.54E-06 |
| RP11-429J17.5 | 8    | 0   | 3.36 | 5.10E-04 |
| HOXB13        | 2989 | 164 | 3.36 | 1.26E-05 |
| SLC38A4       | 125  | 9   | 3.36 | 1.30E-05 |
| AC005077.7    | 7    | 0   | 3.36 | 9.90E-05 |
| PLXNA4        | 1565 | 115 | 3.36 | 2.18E-10 |
| DACT2         | 292  | 20  | 3.35 | 6.18E-08 |
| CTD-3064M3.3  | 404  | 27  | 3.35 | 3.18E-07 |
| AC133680.1    | 10   | 0   | 3.35 | 2.66E-04 |
| PRSS50        | 231  | 12  | 3.35 | 9.07E-05 |
| HTR2A         | 287  | 15  | 3.34 | 1.40E-05 |
| FOXO1B        | 5    | 0   | 3.34 | 1.15E-03 |
| RP11-186F10.2 | 9    | 0   | 3.34 | 1.55E-04 |
| RP11-38H17.1  | 97   | 4   | 3.33 | 2.07E-04 |
| GPM6A         | 385  | 33  | 3.33 | 4.16E-06 |
| NRTN          | 82   | 8   | 3.33 | 5.73E-10 |
| PAK7          | 20   | 2   | 3.33 | 1.45E-04 |
| HOXA11        | 624  | 40  | 3.33 | 7.53E-07 |
| RP11-168E14.1 | 23   | 1   | 3.33 | 4.58E-06 |
| KCND2         | 177  | 11  | 3.32 | 1.92E-06 |
| ELFN1         | 1291 | 102 | 3.31 | 1.73E-13 |

|                |      |     |      |          |
|----------------|------|-----|------|----------|
| MAPK15         | 1006 | 70  | 3.31 | 4.00E-06 |
| LRRC3B         | 90   | 7   | 3.31 | 6.99E-06 |
| KCNJ3          | 59   | 3   | 3.31 | 5.10E-05 |
| GLB1L3         | 240  | 17  | 3.31 | 1.40E-06 |
| ANKRD62P1      | 4    | 0   | 3.31 | 1.30E-03 |
| CRABP1         | 7413 | 213 | 3.31 | 6.74E-04 |
| GPR144         | 30   | 3   | 3.31 | 7.64E-05 |
| DIO3           | 888  | 36  | 3.30 | 2.28E-04 |
| DIRAS2         | 83   | 6   | 3.30 | 6.21E-06 |
| EBF3           | 3638 | 295 | 3.30 | 1.05E-09 |
| GBX1           | 20   | 2   | 3.29 | 9.65E-07 |
| RP11-1134I14.4 | 7    | 0   | 3.29 | 2.77E-04 |
| DMBX1          | 72   | 8   | 3.29 | 9.16E-09 |
| OGDHL          | 285  | 22  | 3.29 | 2.54E-06 |
| IGDCC4         | 3453 | 251 | 3.29 | 1.38E-08 |
| CHRM2          | 98   | 8   | 3.28 | 3.33E-05 |
| KRTAP21-2      | 6    | 0   | 3.28 | 5.75E-04 |
| UROC1          | 33   | 2   | 3.28 | 1.22E-04 |
| SNX18P3        | 26   | 1   | 3.28 | 8.27E-05 |
| AC004540.4     | 99   | 8   | 3.27 | 7.84E-06 |
| LHX5           | 22   | 2   | 3.27 | 6.72E-05 |
| ASS1           | 3684 | 296 | 3.27 | 1.38E-08 |
| RP11-561C5.6   | 134  | 11  | 3.27 | 4.33E-06 |
| RP11-91P17.1   | 5    | 0   | 3.26 | 1.81E-03 |
| CPA6           | 182  | 12  | 3.26 | 2.97E-05 |
| CTC-478M6.1    | 6    | 0   | 3.26 | 1.98E-03 |
| AC018730.1     | 50   | 3   | 3.26 | 2.57E-05 |
| CGB7           | 31   | 3   | 3.25 | 3.48E-08 |
| CILP2          | 6044 | 328 | 3.25 | 5.77E-05 |
| RP11-748L13.1  | 9    | 0   | 3.24 | 1.02E-03 |
| NOTUM          | 225  | 17  | 3.24 | 3.53E-07 |
| RYR1           | 1804 | 119 | 3.24 | 3.14E-06 |
| GPER           | 884  | 72  | 3.24 | 1.66E-10 |
| RP11-360I20.2  | 27   | 2   | 3.24 | 3.31E-04 |
| NKD1           | 322  | 25  | 3.23 | 1.97E-08 |
| NKAIN1P1       | 17   | 1   | 3.22 | 6.04E-04 |
| DGCR5          | 203  | 18  | 3.22 | 1.38E-10 |
| NXPH4          | 2467 | 162 | 3.21 | 8.38E-06 |
| MSI1           | 328  | 27  | 3.21 | 4.85E-08 |
| SAMD11         | 1366 | 114 | 3.21 | 2.12E-07 |
| RP11-422P22.1  | 11   | 1   | 3.20 | 1.12E-03 |
| NKD2           | 3045 | 282 | 3.20 | 7.12E-10 |
| ROBO2          | 1423 | 81  | 3.20 | 1.03E-04 |
| CTA-392E5.1    | 20   | 1   | 3.19 | 1.23E-03 |
| CYP2W1         | 54   | 6   | 3.18 | 5.96E-07 |
| AP000662.4     | 162  | 15  | 3.18 | 5.19E-09 |
| C1orf145       | 238  | 20  | 3.18 | 8.89E-09 |

|               |       |     |      |          |
|---------------|-------|-----|------|----------|
| ZFHX4         | 10617 | 885 | 3.18 | 2.33E-08 |
| FAM19A3       | 460   | 36  | 3.18 | 2.61E-06 |
| ASXL3         | 280   | 20  | 3.18 | 2.69E-06 |
| CTC-276P9.1   | 7     | 1   | 3.17 | 9.69E-04 |
| TCEAL2        | 421   | 26  | 3.17 | 6.46E-04 |
| NRG1          | 170   | 16  | 3.17 | 5.11E-07 |
| PTX3          | 1804  | 123 | 3.17 | 1.30E-05 |
| RP11-763B22.7 | 9     | 1   | 3.16 | 5.45E-04 |
| TIMM8AP1      | 53    | 6   | 3.16 | 7.25E-06 |
| C21orf88      | 14    | 1   | 3.16 | 5.31E-05 |
| CTXN3         | 7     | 0   | 3.16 | 1.93E-03 |
| IGSF9         | 370   | 29  | 3.15 | 3.88E-06 |
| CTD-3064M3.1  | 6     | 1   | 3.15 | 9.12E-04 |
| TLL2          | 8     | 1   | 3.15 | 1.98E-04 |
| CLDN19        | 112   | 6   | 3.15 | 1.26E-03 |
| ADD2          | 840   | 81  | 3.14 | 3.84E-16 |
| HMGA2         | 6265  | 487 | 3.14 | 2.85E-06 |
| IGDCC3        | 548   | 36  | 3.13 | 5.17E-05 |
| PROKR1        | 53    | 4   | 3.13 | 1.32E-04 |
| EVX2          | 94    | 5   | 3.13 | 7.79E-04 |
| RP1-104O17.1  | 5     | 0   | 3.12 | 1.36E-03 |
| GRIK1         | 602   | 48  | 3.12 | 1.87E-06 |
| SGCZ          | 52    | 3   | 3.12 | 1.30E-03 |
| AC108025.2    | 8     | 0   | 3.12 | 1.55E-03 |
| MIR199A2      | 14    | 1   | 3.12 | 1.20E-04 |
| CECR2         | 235   | 19  | 3.12 | 1.51E-06 |
| CTD-2062F14.3 | 16    | 1   | 3.12 | 1.03E-04 |
| AC073316.1    | 13    | 2   | 3.11 | 4.13E-05 |
| TLL2          | 646   | 52  | 3.11 | 2.71E-04 |
| GABRG1        | 18    | 1   | 3.11 | 2.41E-04 |
| AC140481.1    | 173   | 13  | 3.11 | 7.18E-05 |
| CNTNAP4       | 111   | 5   | 3.11 | 9.41E-04 |
| FAM108A7P     | 22    | 1   | 3.11 | 2.58E-05 |
| TRIM72        | 34    | 3   | 3.10 | 5.39E-05 |
| C2Oorf166-AS1 | 75    | 6   | 3.10 | 5.18E-06 |
| SYN2          | 296   | 27  | 3.10 | 5.32E-09 |
| FOXQ1         | 159   | 11  | 3.10 | 2.99E-05 |
| LRRC4B        | 1370  | 116 | 3.09 | 1.14E-07 |
| FGFR3         | 1142  | 103 | 3.09 | 4.04E-07 |
| BMP4          | 1375  | 134 | 3.08 | 4.68E-12 |
| ZNF556        | 18    | 1   | 3.08 | 8.37E-06 |
| GOLGA8IP      | 35    | 3   | 3.08 | 2.83E-05 |
| AHRR          | 417   | 35  | 3.08 | 1.23E-06 |
| NPPC          | 598   | 28  | 3.08 | 1.03E-03 |
| RP11-143E21.7 | 253   | 26  | 3.08 | 2.05E-05 |
| TAS1R1        | 67    | 5   | 3.08 | 1.48E-05 |
| RP1-170O19.20 | 9     | 0   | 3.08 | 9.22E-04 |

|               |       |      |       |          |
|---------------|-------|------|-------|----------|
| CTA-714B7.5   | 12    | 1    | 3.07  | 4.04E-04 |
| LY6H          | 391   | 46   | 3.07  | 8.43E-06 |
| SDR9C7        | 22    | 1    | 3.07  | 9.27E-04 |
| FEZF2         | 9     | 0    | 3.07  | 1.53E-03 |
| C16orf11      | 26    | 2    | 3.07  | 9.07E-05 |
| NELL2         | 1074  | 104  | 3.07  | 3.28E-08 |
| FGF10         | 1053  | 70   | 3.07  | 1.38E-04 |
| LINC00533     | 3     | 0    | 3.07  | 4.43E-03 |
| RPL29P19      | 90    | 9    | 3.06  | 6.09E-05 |
| HOXD13        | 1670  | 126  | 3.06  | 1.30E-04 |
| OBSCN         | 7036  | 568  | 3.06  | 2.49E-06 |
| MOS           | 2     | 0    | 3.06  | 4.28E-03 |
| RP11-117L5.4  | 4     | 0    | 3.06  | 4.49E-03 |
| CHRNB4        | 41    | 2    | 3.06  | 1.41E-04 |
| PDE9A         | 942   | 100  | 3.06  | 7.48E-12 |
| COX6B2        | 96    | 7    | 3.06  | 2.99E-05 |
| RP11-588P8.1  | 5     | 0    | 3.06  | 4.84E-03 |
| PRHOXNB       | 3     | 0    | 3.05  | 4.73E-03 |
| AC010984.3    | 5     | 0    | 3.05  | 2.33E-03 |
| AC012065.7    | 289   | 35   | 3.04  | 2.70E-13 |
| GABRE         | 5631  | 432  | 3.04  | 1.96E-05 |
| RP11-116O18.1 | 30    | 4    | 3.04  | 2.89E-04 |
| CDH3          | 1226  | 111  | 3.04  | 5.29E-07 |
| FAM69C        | 434   | 32   | 3.04  | 1.35E-04 |
| RP11-166A12.1 | 4     | 0    | 3.04  | 4.82E-03 |
| KCNK4         | 3     | 0    | 3.04  | 2.92E-03 |
| NOG           | 127   | 10   | 3.03  | 3.48E-05 |
| BZRAP1        | 2222  | 193  | 3.03  | 6.78E-06 |
| ELAVL4        | 282   | 27   | 3.03  | 4.53E-05 |
| DMRTA2        | 444   | 27   | 3.02  | 7.95E-04 |
| RGS2          | 15776 | 1568 | 3.02  | 8.93E-08 |
| MIR4297       | 7     | 1    | 3.02  | 7.18E-04 |
| KCNN1         | 243   | 22   | 3.01  | 8.08E-07 |
| CTD-2319I12.1 | 240   | 23   | 3.00  | 1.18E-05 |
| FOXG1         | 1186  | 74   | 3.00  | 7.22E-04 |
| ARHGAP28      | 2856  | 265  | 3.00  | 4.49E-06 |
| GADL1         | 21    | 2    | 3.00  | 2.13E-06 |
| RP11-432J24.3 | 10    | 1    | 3.00  | 1.85E-04 |
| FAM83F        | 2     | 25   | -3.01 | 1.56E-04 |
| TRBV5-1       | 1     | 13   | -3.02 | 1.16E-06 |
| RPL39P29      | 0     | 7    | -3.02 | 6.64E-03 |
| RP11-737O24.1 | 0     | 7    | -3.05 | 5.13E-03 |
| RP11-4G2.1    | 1     | 16   | -3.06 | 4.32E-04 |
| LINC00346     | 20    | 195  | -3.09 | 4.98E-09 |
| RP11-79E3.3   | 0     | 5    | -3.12 | 3.75E-03 |
| CTD-2374C24.1 | 0     | 6    | -3.13 | 2.45E-03 |
| RP11-173C20.2 | 40    | 424  | -3.17 | 2.16E-09 |

|               |     |      |       |          |
|---------------|-----|------|-------|----------|
| RP11-279O17.2 | 0   | 3    | -3.19 | 3.65E-03 |
| OR2M4         | 0   | 5    | -3.19 | 3.88E-03 |
| RP11-11N5.1   | 0   | 9    | -3.25 | 5.86E-04 |
| AC011899.9    | 13  | 184  | -3.32 | 1.33E-06 |
| RP1-102K2.6   | 1   | 12   | -3.39 | 6.28E-05 |
| RP11-348J24.2 | 1   | 11   | -3.47 | 3.97E-05 |
| PANX3         | 1   | 24   | -3.47 | 1.73E-05 |
| NFYAP1        | 0   | 10   | -3.50 | 3.38E-04 |
| RP11-575F12.2 | 3   | 75   | -3.58 | 2.36E-05 |
| MAGEA2B       | 0   | 11   | -3.66 | 2.52E-04 |
| OR8Q1P        | 0   | 10   | -3.77 | 1.25E-04 |
| BMP8B         | 152 | 3175 | -4.17 | 7.81E-24 |
| RP11-521D12.1 | 0   | 14   | -4.24 | 8.56E-07 |
| OR8A1         | 0   | 19   | -4.47 | 7.03E-07 |
| RP11-6N13.1   | 0   | 15   | -4.61 | 2.47E-07 |

**Supplementary Table 6: Gene Ontology Analysis of Genes upregulated 8-fold, FDR<0.05 in PRC2 Lost Samples**

| Category        | Term                                                             | Gene Count | % of list | Fold       |          | Benjamini  |     |
|-----------------|------------------------------------------------------------------|------------|-----------|------------|----------|------------|-----|
|                 |                                                                  |            |           | Enrichment | PValue   | FDR        | FDR |
| UP_SEQ_FEATURE  | DNA-binding region:Homeobox                                      | 33         | 9.65      | 10.25      | 7.12E-23 | 7.64E-20   |     |
| SP_PIR_KEYWORDS | Homeobox                                                         | 35         | 10.23     | 8.59       | 1.07E-21 | 3.12E-19   |     |
| INTERPRO        | IPR017970:Homeobox, conserved site                               | 35         | 10.23     | 8.38       | 1.84E-21 | 9.61E-19   |     |
| INTERPRO        | IPR001356:Homeobox                                               | 34         | 9.94      | 8.03       | 2.88E-20 | 7.50E-18   |     |
| SP_PIR_KEYWORDS | developmental protein                                            | 55         | 16.08     | 4.19       | 3.78E-19 | 5.50E-17   |     |
| INTERPRO        | IPR012287:Homeodomain-related                                    | 33         | 9.65      | 7.70       | 4.16E-19 | 7.23E-17   |     |
| SMART           | SM00389:HOX                                                      | 34         | 9.94      | 6.88       | 1.14E-18 | 1.31E-16   |     |
| GOTERM_BP_FAT   | GO:0030182~neuron differentiation                                | 37         | 10.82     | 4.68       | 1.64E-14 | 2.58E-11   |     |
| GOTERM_MF_FAT   | GO:0043565~sequence-specific DNA binding                         | 43         | 12.57     | 3.85       | 6.37E-14 | 2.62E-11   |     |
| GOTERM_MF_FAT   | GO:0003700~transcription factor activity                         | 50         | 14.62     | 2.79       | 6.01E-11 | 1.24E-08   |     |
| GOTERM_MF_FAT   | GO:0030528~transcription regulator activity                      | 64         | 18.71     | 2.30       | 1.77E-10 | 2.43E-08   |     |
| GOTERM_BP_FAT   | GO:0048598~embryonic morphogenesis                               | 26         | 7.60      | 4.70       | 2.74E-10 | 1.43E-07   |     |
| GOTERM_BP_FAT   | GO:0060173~limb development                                      | 16         | 4.68      | 8.61       | 4.26E-10 | 1.67E-07   |     |
| GOTERM_BP_FAT   | GO:0048736~appendage development                                 | 16         | 4.68      | 8.61       | 4.26E-10 | 1.67E-07   |     |
| GOTERM_BP_FAT   | GO:0035107~appendage morphogenesis                               | 16         | 4.68      | 8.96       | 2.39E-10 | 1.88E-07   |     |
| GOTERM_BP_FAT   | GO:0035108~limb morphogenesis                                    | 16         | 4.68      | 8.96       | 2.39E-10 | 1.88E-07   |     |
| GOTERM_BP_FAT   | GO:0001501~skeletal system development                           | 26         | 7.60      | 4.52       | 6.09E-10 | 1.91E-07   |     |
| GOTERM_BP_FAT   | GO:0048666~neuron development                                    | 26         | 7.60      | 4.25       | 2.17E-09 | 4.85E-07   |     |
| GOTERM_BP_FAT   | GO:0030900~forebrain development                                 | 18         | 5.26      | 6.57       | 1.91E-09 | 5.00E-07   |     |
| GOTERM_BP_FAT   | GO:0051216~cartilage development                                 | 13         | 3.80      | 9.74       | 7.05E-09 | 1.38E-06   |     |
| SP_PIR_KEYWORDS | glycoprotein                                                     | 117        | 34.21     | 1.61       | 2.08E-08 | 2.02E-06   |     |
| GOTERM_BP_FAT   | GO:0007389~pattern specification process                         | 22         | 6.43      | 4.57       | 1.46E-08 | 2.54E-06   |     |
| GOTERM_BP_FAT   | GO:0042471~ear morphogenesis                                     | 12         | 3.51      | 10.08      | 2.25E-08 | 3.53E-06   |     |
| SP_PIR_KEYWORDS | cell membrane                                                    | 71         | 20.76     | 1.92       | 7.70E-08 | 5.60E-06   |     |
| SP_PIR_KEYWORDS | dna-binding                                                      | 63         | 18.42     | 2.00       | 1.29E-07 | 7.53E-06   |     |
| GOTERM_BP_FAT   | GO:0048562~embryonic organ morphogenesis                         | 15         | 4.39      | 6.25       | 1.15E-07 | 1.64E-05   |     |
| UP_SEQ_FEATURE  | glycosylation site:N-linked (GlcNAc...)                          | 113        | 33.04     | 1.61       | 3.57E-08 | 1.92E-05   |     |
| GOTERM_BP_FAT   | GO:0007423~sensory organ development                             | 19         | 5.56      | 4.60       | 1.64E-07 | 2.14E-05   |     |
| SP_PIR_KEYWORDS | signal                                                           | 91         | 26.61     | 1.66       | 4.70E-07 | 2.28E-05   |     |
| GOTERM_BP_FAT   | GO:0045165~cell fate commitment                                  | 15         | 4.39      | 5.98       | 2.00E-07 | 2.41E-05   |     |
| GOTERM_BP_FAT   | GO:0035113~embryonic appendage morphogenesis                     | 12         | 3.51      | 7.65       | 4.22E-07 | 4.72E-05   |     |
| GOTERM_BP_FAT   | GO:0030326~embryonic limb morphogenesis                          | 12         | 3.51      | 7.65       | 4.22E-07 | 4.72E-05   |     |
| GOTERM_BP_FAT   | GO:0048568~embryonic organ development                           | 16         | 4.68      | 5.16       | 4.83E-07 | 5.05E-05   |     |
| GOTERM_BP_FAT   | GO:0003002~regionalization                                       | 17         | 4.97      | 4.78       | 5.25E-07 | 5.15E-05   |     |
| GOTERM_BP_FAT   | GO:0006355~regulation of transcription, DNA-dependent            | 61         | 17.84     | 1.91       | 6.07E-07 | 5.60E-05   |     |
| GOTERM_BP_FAT   | GO:0031175~neuron projection development                         | 19         | 5.56      | 4.11       | 8.57E-07 | 7.46E-05   |     |
| GOTERM_BP_FAT   | GO:0043583~ear development                                       | 12         | 3.51      | 7.00       | 1.04E-06 | 8.55E-05   |     |
| UP_SEQ_FEATURE  | compositionally biased region:Poly-Ala                           | 24         | 7.02      | 3.60       | 2.66E-07 | 9.52E-05   |     |
| GOTERM_BP_FAT   | GO:0051252~regulation of RNA metabolic process                   | 61         | 17.84     | 1.87       | 1.29E-06 | 1.01E-04   |     |
| GOTERM_BP_FAT   | GO:0007409~axonogenesis                                          | 16         | 4.68      | 4.60       | 2.09E-06 | 1.56E-04   |     |
| UP_SEQ_FEATURE  | signal peptide                                                   | 91         | 26.61     | 1.65       | 6.24E-07 | 1.67E-04   |     |
| GOTERM_BP_FAT   | GO:0007267~cell-cell signaling                                   | 29         | 8.48      | 2.68       | 3.60E-06 | 2.56E-04   |     |
| GOTERM_BP_FAT   | GO:0045449~regulation of transcription                           | 77         | 22.51     | 1.64       | 4.12E-06 | 2.69E-04   |     |
| GOTERM_BP_FAT   | GO:0007610~behavior                                              | 25         | 7.31      | 2.96       | 3.99E-06 | 2.72E-04   |     |
| GOTERM_BP_FAT   | GO:0001655~urogenital system development                         | 12         | 3.51      | 6.05       | 4.47E-06 | 2.80E-04   |     |
| GOTERM_BP_FAT   | GO:0048705~skeletal system morphogenesis                         | 12         | 3.51      | 5.94       | 5.33E-06 | 3.21E-04   |     |
| GOTERM_BP_FAT   | GO:0048667~cell morphogenesis involved in neuron differentiation | 16         | 4.68      | 4.24       | 5.58E-06 | 3.24E-04   |     |
| GOTERM_CC_FAT   | GO:0030425~dendrite                                              | 14         | 4.09      | 4.99       | 4.50E-06 | 3.42E-04   |     |
| GOTERM_BP_FAT   | GO:0001763~morphogenesis of a branching structure                | 10         | 2.92      | 7.49       | 6.72E-06 | 3.63E-04   |     |
| GOTERM_BP_FAT   | GO:0042472~inner ear morphogenesis                               | 9          | 2.63      | 8.91       | 6.52E-06 | 3.65E-04   |     |
| GOTERM_BP_FAT   | GO:0048812~neuron projection morphogenesis                       | 16         | 4.68      | 4.16       | 6.99E-06 | 3.65E-04   |     |
| GOTERM_CC_FAT   | GO:0044459~plasma membrane part                                  | 66         | 19.30     | 1.74       | 3.28E-06 | 3.74E-04   |     |
| GOTERM_CC_FAT   | GO:0043005~neuron projection                                     | 20         | 5.85      | 3.40       | 6.70E-06 | 3.82E-04   |     |
| GOTERM_BP_FAT   | GO:0000904~cell morphogenesis involved in differentiation        | 17         | 4.97      | 3.86       | 8.54E-06 | 4.32E-04   |     |
| GOTERM_CC_FAT   | GO:0005886~plasma membrane                                       | 98         | 28.65     | 1.51       | 2.23E-06 | 5.08E-04   |     |
| GOTERM_CC_FAT   | GO:0045202~synapse                                               | 20         | 5.85      | 3.27       | 1.14E-05 | 5.20E-04   |     |
| GOTERM_BP_FAT   | GO:0009953~dorsal/ventral pattern formation                      | 9          | 2.63      | 8.32       | 1.10E-05 | 5.41E-04   |     |
| GOTERM_BP_FAT   | GO:0001656~metanephros development                               | 8          | 2.34      | 10.08      | 1.20E-05 | 5.72E-04   |     |
| GOTERM_BP_FAT   | GO:0007411~axon guidance                                         | 11         | 3.22      | 5.70       | 2.22E-05 | 9.95E-04   |     |
| GOTERM_BP_FAT   | GO:0048729~tissue morphogenesis                                  | 14         | 4.09      | 4.31       | 2.22E-05 | 0.00102288 |     |
| GOTERM_BP_FAT   | GO:0048732~gland development                                     | 12         | 3.51      | 4.93       | 3.16E-05 | 0.00137594 |     |
| GOTERM_BP_FAT   | GO:0001657~ureteric bud development                              | 7          | 2.05      | 11.09      | 3.31E-05 | 0.00140273 |     |

|                 |                                                                       |     |       |       |            |            |
|-----------------|-----------------------------------------------------------------------|-----|-------|-------|------------|------------|
|                 | GO:0009792~embryonic development ending in birth or egg hatching      | 19  | 5.56  | 3.15  | 3.42E-05   | 0.00140928 |
| GOTERM_BP_FAT   | GO:0030030~cell projection organization                               | 20  | 5.85  | 3.01  | 3.71E-05   | 0.00145383 |
| GOTERM_BP_FAT   | GO:0048858~cell projection morphogenesis                              | 16  | 4.68  | 3.62  | 3.68E-05   | 0.00147735 |
| GOTERM_MF_FAT   | GO:0042165~neurotransmitter binding                                   | 11  | 3.22  | 5.80  | 1.88E-05   | 0.00193749 |
| GOTERM_CC_FAT   | GO:0034702~ion channel complex                                        | 14  | 4.09  | 3.97  | 5.22E-05   | 0.0019833  |
| GOTERM_BP_FAT   | GO:0032990~cell part morphogenesis                                    | 16  | 4.68  | 3.47  | 6.11E-05   | 0.00233333 |
| UP_SEQ_FEATURE  | compositionally biased region:Ala-rich                                | 13  | 3.80  | 5.01  | 1.16E-05   | 0.00249501 |
| GOTERM_BP_FAT   | GO:0048706~embryonic skeletal system development                      | 9   | 2.63  | 6.48  | 6.98E-05   | 0.00260391 |
| GOTERM_BP_FAT   | GO:0048839~inner ear development                                      | 9   | 2.63  | 6.32  | 8.40E-05   | 0.00305699 |
| GOTERM_BP_FAT   | GO:0035239~tube morphogenesis                                         | 11  | 3.22  | 4.80  | 9.67E-05   | 0.00343911 |
| GOTERM_BP_FAT   | GO:0043009~chordate embryonic development                             | 18  | 5.26  | 3.02  | 1.03E-04   | 0.00357131 |
| INTERPRO        | IPR003961:Fibronectin, type III                                       | 14  | 4.09  | 4.09  | 4.03E-05   | 0.00418596 |
| SP_PIR_KEYWORDS | differentiation                                                       | 21  | 6.14  | 2.71  | 1.10E-04   | 0.0045474  |
| GOTERM_MF_FAT   | GO:0030594~neurotransmitter receptor activity                         | 10  | 2.92  | 5.72  | 6.00E-05   | 0.00493265 |
| GOTERM_BP_FAT   | GO:0044057~regulation of system process                               | 17  | 4.97  | 3.05  | 1.49E-04   | 0.00506195 |
| INTERPRO        | IPR013098:Immunoglobulin I-set                                        | 12  | 3.51  | 4.83  | 3.95E-05   | 0.00513575 |
| GOTERM_BP_FAT   | GO:0048754~branching morphogenesis of a tube                          | 8   | 2.34  | 6.82  | 1.59E-04   | 0.0052817  |
| GOTERM_BP_FAT   | GO:0008284~positive regulation of cell proliferation                  | 20  | 5.85  | 2.68  | 1.75E-04   | 0.00558951 |
| GOTERM_BP_FAT   | GO:0035295~tube development                                           | 14  | 4.09  | 3.53  | 1.74E-04   | 0.0056594  |
| UP_SEQ_FEATURE  | topological domain:Cytoplasmic                                        | 87  | 25.44 | 1.52  | 3.36E-05   | 0.00599681 |
| GOTERM_CC_FAT   | GO:0031226~intrinsic to plasma membrane                               | 39  | 11.40 | 1.86  | 1.86E-04   | 0.00604027 |
| SP_PIR_KEYWORDS | neurogenesis                                                          | 11  | 3.22  | 4.47  | 1.83E-04   | 0.00663865 |
| GOTERM_CC_FAT   | GO:0005887~integral to plasma membrane                                | 38  | 11.11 | 1.86  | 2.49E-04   | 0.00706707 |
| SP_PIR_KEYWORDS | synapse                                                               | 13  | 3.80  | 3.62  | 2.69E-04   | 0.00780144 |
| GOTERM_MF_FAT   | GO:0003677~DNA binding                                                | 67  | 19.59 | 1.56  | 1.15E-04   | 0.00786028 |
| GOTERM_BP_FAT   | GO:0002062~chondrocyte differentiation                                | 5   | 1.46  | 15.40 | 2.55E-04   | 0.00796272 |
| SP_PIR_KEYWORDS | disulfide bond                                                        | 74  | 21.64 | 1.50  | 2.52E-04   | 0.00810702 |
| SP_PIR_KEYWORDS | ionic channel                                                         | 16  | 4.68  | 2.99  | 3.36E-04   | 0.00885792 |
| GOTERM_BP_FAT   | GO:0035115~embryonic forelimb morphogenesis                           | 5   | 1.46  | 14.59 | 3.18E-04   | 0.0097412  |
| SMART           | SM00060:FN3                                                           | 14  | 4.09  | 3.50  | 1.71E-04   | 0.00977239 |
| SP_PIR_KEYWORDS | membrane                                                              | 135 | 39.47 | 1.28  | 4.07E-04   | 0.00982282 |
| GOTERM_BP_FAT   | GO:0001822~kidney development                                         | 9   | 2.63  | 5.20  | 3.29E-04   | 0.00985965 |
| GOTERM_MF_FAT   | GO:0022836~gated channel activity                                     | 17  | 4.97  | 2.98  | 1.93E-04   | 0.01131749 |
| UP_SEQ_FEATURE  | domain:Fibronectin type-III 1                                         | 11  | 3.22  | 4.95  | 7.84E-05   | 0.01194749 |
| UP_SEQ_FEATURE  | topological domain:Extracellular                                      | 72  | 21.05 | 1.56  | 9.71E-05   | 0.01294374 |
| GOTERM_BP_FAT   | GO:0002009~morphogenesis of an epithelium                             | 9   | 2.63  | 4.94  | 4.64E-04   | 0.01362919 |
| GOTERM_BP_FAT   | GO:0048704~embryonic skeletal system morphogenesis                    | 7   | 2.05  | 6.81  | 5.33E-04   | 0.01535295 |
| SP_PIR_KEYWORDS | Secreted                                                              | 47  | 13.74 | 1.65  | 7.49E-04   | 0.01546103 |
| SP_PIR_KEYWORDS | cleavage on pair of basic residues                                    | 14  | 4.09  | 3.07  | 7.05E-04   | 0.01566289 |
| GOTERM_BP_FAT   | GO:0060675~ureteric bud morphogenesis                                 | 5   | 1.46  | 12.60 | 5.76E-04   | 0.01628855 |
| GOTERM_BP_FAT   | GO:0001658~branching involved in ureteric bud morphogenesis           | 5   | 1.46  | 12.60 | 5.76E-04   | 0.01628855 |
| GOTERM_BP_FAT   | GO:0035136~forelimb morphogenesis                                     | 5   | 1.46  | 12.60 | 5.76E-04   | 0.01628855 |
| GOTERM_BP_FAT   | GO:0007166~cell surface receptor linked signal transduction           | 53  | 15.50 | 1.58  | 6.22E-04   | 0.01725733 |
| GOTERM_BP_FAT   | GO:0030902~hindbrain development                                      | 7   | 2.05  | 6.47  | 7.03E-04   | 0.01915297 |
| GOTERM_BP_FAT   | GO:0000902~cell morphogenesis                                         | 17  | 4.97  | 2.65  | 7.15E-04   | 0.01915563 |
| GOTERM_BP_FAT   | GO:0030850~prostate gland development                                 | 4   | 1.17  | 20.16 | 8.49E-04   | 0.02231996 |
| SP_PIR_KEYWORDS | cell junction                                                         | 17  | 4.97  | 2.53  | 0.00123834 | 0.02375208 |
| GOTERM_BP_FAT   | GO:0009952~anterior/posterior pattern formation                       | 10  | 2.92  | 3.96  | 9.55E-04   | 0.02388171 |
| GOTERM_BP_FAT   | GO:0007186~G-protein coupled receptor protein signaling pathway       | 36  | 10.53 | 1.78  | 9.25E-04   | 0.02390333 |
| GOTERM_BP_FAT   | GO:0042733~embryonic digit morphogenesis                              | 5   | 1.46  | 11.09 | 9.55E-04   | 0.0242527  |
| GOTERM_BP_FAT   | GO:0021537~telencephalon development                                  | 7   | 2.05  | 5.97  | 0.00107624 | 0.02644482 |
| GOTERM_CC_FAT   | GO:0005576~extracellular region                                       | 53  | 15.50 | 1.53  | 0.00118348 | 0.02663802 |
| SP_PIR_KEYWORDS | deafness                                                              | 8   | 2.34  | 4.75  | 0.00148835 | 0.02672596 |
| KEGG_PATHWAY    | hsa04080:Neuroactive ligand-receptor interaction                      | 13  | 3.80  | 3.31  | 4.02E-04   | 0.02697881 |
| GOTERM_CC_FAT   | GO:0044456~synapse part                                               | 13  | 3.80  | 3.07  | 0.00109957 | 0.02748634 |
| GOTERM_BP_FAT   | GO:0060562~epithelial tube morphogenesis                              | 7   | 2.05  | 5.79  | 0.00126218 | 0.03046914 |
| SP_PIR_KEYWORDS | ion transport                                                         | 21  | 6.14  | 2.16  | 0.00192353 | 0.03064749 |
| SP_PIR_KEYWORDS | egf-like domain                                                       | 12  | 3.51  | 3.10  | 0.00182526 | 0.03078871 |
| GOTERM_BP_FAT   | GO:0051173~positive regulation of nitrogen compound metabolic process | 24  | 7.02  | 2.07  | 0.00133633 | 0.03174331 |
| GOTERM_BP_FAT   | GO:0021915~neural tube development                                    | 7   | 2.05  | 5.71  | 0.00136389 | 0.03190484 |
| GOTERM_BP_FAT   | GO:0006811~ion transport                                              | 27  | 7.89  | 1.95  | 0.00140087 | 0.03227509 |
| GOTERM_BP_FAT   | GO:0007631~feeding behavior                                           | 7   | 2.05  | 5.62  | 0.00147174 | 0.03245304 |
| GOTERM_BP_FAT   | GO:0001759~induction of an organ                                      | 4   | 1.17  | 17.06 | 0.00143297 | 0.03252557 |
| GOTERM_BP_FAT   | GO:0042474~middle ear morphogenesis                                   | 4   | 1.17  | 17.06 | 0.00143297 | 0.03252557 |
| GOTERM_BP_FAT   | GO:0016337~cell-cell adhesion                                         | 14  | 4.09  | 2.81  | 0.00146415 | 0.03274854 |
| GOTERM_MF_FAT   | GO:0004983~neuropeptide Y receptor activity                           | 4   | 1.17  | 21.73 | 6.64E-04   | 0.03361149 |



|                 |                                                                                                         |     |       |       |            |            |
|-----------------|---------------------------------------------------------------------------------------------------------|-----|-------|-------|------------|------------|
| GOTERM_MF_FAT   | GO:0005216~ion channel activity                                                                         | 18  | 5.26  | 2.53  | 7.69E-04   | 0.03462465 |
| INTERPRO        | IPR006209:EGF                                                                                           | 10  | 2.92  | 4.37  | 4.78E-04   | 0.03493408 |
| GOTERM_BP_FAT   | GO:0060348~bone development                                                                             | 9   | 2.63  | 4.06  | 0.00168746 | 0.03611196 |
| GOTERM_BP_FAT   | GO:0019226~transmission of nerve impulse                                                                | 16  | 4.68  | 2.53  | 0.00167725 | 0.03639358 |
| GOTERM_CC_FAT   | GO:0034703~cation channel complex                                                                       | 9   | 2.63  | 3.96  | 0.00195418 | 0.03648358 |
| INTERPRO        | IPR000611:Neuropeptide Y receptor                                                                       | 4   | 1.17  | 24.68 | 4.44E-04   | 0.03780991 |
| GOTERM_BP_FAT   | GO:0006937~regulation of muscle contraction                                                             | 7   | 2.05  | 5.39  | 0.00183454 | 0.03867333 |
| GOTERM_BP_FAT   | GO:0021978~telencephalon regionalization                                                                | 3   | 0.88  | 41.58 | 0.00188264 | 0.03914245 |
| GOTERM_CC_FAT   | GO:0042995~cell projection                                                                              | 24  | 7.02  | 2.00  | 0.00195354 | 0.03972072 |
| SP_PIR_KEYWORDS | neurotransmitter receptor                                                                               | 6   | 1.75  | 6.25  | 0.00265356 | 0.03987844 |
| GOTERM_BP_FAT   | GO:0045935~positive regulation of nucleobase, nucleoside, nucleotide and nucleic acid metabolic process | 23  | 6.73  | 2.04  | 0.00198556 | 0.04070129 |
| UP_SEQ_FEATURE  | domain:Fibronectin type-III 2                                                                           | 10  | 2.92  | 4.54  | 3.70E-04   | 0.04315423 |
| GOTERM_MF_FAT   | GO:0022838~substrate specific channel activity                                                          | 18  | 5.26  | 2.46  | 0.00108101 | 0.04358334 |
| GOTERM_BP_FAT   | GO:0032989~cellular component morphogenesis                                                             | 17  | 4.97  | 2.37  | 0.00221844 | 0.04478692 |
| GOTERM_CC_FAT   | GO:0014701~junctional sarcoplasmic reticulum membrane                                                   | 3   | 0.88  | 34.86 | 0.00282439 | 0.04839532 |
| GOTERM_BP_FAT   | GO:0060021~palate development                                                                           | 5   | 1.46  | 8.66  | 0.00245972 | 0.04891371 |
| SP_PIR_KEYWORDS | transcription regulation                                                                                | 51  | 14.91 | 1.49  | 0.00346557 | 0.04925718 |
| UP_SEQ_FEATURE  | disulfide bond                                                                                          | 71  | 20.76 | 1.49  | 4.89E-04   | 0.0511736  |
| GOTERM_BP_FAT   | GO:0001654~eye development                                                                              | 9   | 2.63  | 3.78  | 0.00262999 | 0.05156241 |
| GOTERM_BP_FAT   | GO:0060350~endochondral bone morphogenesis                                                              | 4   | 1.17  | 13.86 | 0.0026963  | 0.05217813 |
| GOTERM_MF_FAT   | GO:0005261~cation channel activity                                                                      | 14  | 4.09  | 2.77  | 0.00170126 | 0.05253262 |
| GOTERM_MF_FAT   | GO:0022803~passive transmembrane transporter activity                                                   | 18  | 5.26  | 2.37  | 0.00160425 | 0.05363157 |
| GOTERM_BP_FAT   | GO:0007268~synaptic transmission                                                                        | 14  | 4.09  | 2.60  | 0.00288661 | 0.05508413 |
| GOTERM_CC_FAT   | GO:0030054~cell junction                                                                                | 19  | 5.56  | 2.13  | 0.00351139 | 0.05567621 |
| GOTERM_BP_FAT   | GO:0050801~ion homeostasis                                                                              | 17  | 4.97  | 2.30  | 0.00299593 | 0.05642781 |
| GOTERM_MF_FAT   | GO:0015267~channel activity                                                                             | 18  | 5.26  | 2.37  | 0.00156246 | 0.05688481 |
| GOTERM_BP_FAT   | GO:0019229~regulation of vasoconstriction                                                               | 5   | 1.46  | 8.15  | 0.00308455 | 0.05736272 |
| GOTERM_BP_FAT   | GO:0006873~cellular ion homeostasis                                                                     | 16  | 4.68  | 2.37  | 0.0031637  | 0.05810549 |
| GOTERM_BP_FAT   | GO:0050877~neurological system process                                                                  | 36  | 10.53 | 1.65  | 0.00326328 | 0.05919017 |
| GOTERM_BP_FAT   | GO:0055082~cellular chemical homeostasis                                                                | 16  | 4.68  | 2.33  | 0.00366642 | 0.06551436 |
| INTERPRO        | IPR001092:Basic helix-loop-helix dimerisation region bHLH                                               | 9   | 2.63  | 4.38  | 0.00104237 | 0.06566426 |
| GOTERM_MF_FAT   | GO:0015276~ligand-gated ion channel activity                                                            | 9   | 2.63  | 3.85  | 0.00233835 | 0.0665751  |
| GOTERM_MF_FAT   | GO:0022834~ligand-gated channel activity                                                                | 9   | 2.63  | 3.85  | 0.00233835 | 0.0665751  |
| INTERPRO        | IPR003598:Immunoglobulin subtype 2                                                                      | 12  | 3.51  | 3.25  | 0.00122456 | 0.06847464 |
| SP_PIR_KEYWORDS | DNA binding                                                                                             | 14  | 4.09  | 2.44  | 0.00519551 | 0.069639   |
| GOTERM_BP_FAT   | GO:0060284~regulation of cell development                                                               | 11  | 3.22  | 2.97  | 0.00397142 | 0.06998383 |
| GOTERM_BP_FAT   | GO:0030001~metal ion transport                                                                          | 18  | 5.26  | 2.15  | 0.0043742  | 0.07596848 |
| GOTERM_BP_FAT   | GO:0045168~cell-cell signaling involved in cell fate specification                                      | 4   | 1.17  | 11.67 | 0.00448393 | 0.07695307 |
| GOTERM_BP_FAT   | GO:0031128~developmental induction                                                                      | 4   | 1.17  | 11.67 | 0.00448393 | 0.07695307 |
| GOTERM_BP_FAT   | GO:0006940~regulation of smooth muscle contraction                                                      | 5   | 1.46  | 7.30  | 0.00464251 | 0.07787193 |
| GOTERM_BP_FAT   | GO:0060351~cartilage development involved in endochondral bone morphogenesis                            | 3   | 0.88  | 27.72 | 0.00459584 | 0.07795019 |
| GOTERM_BP_FAT   | GO:0048589~developmental growth                                                                         | 7   | 2.05  | 4.46  | 0.00474809 | 0.07873557 |
| GOTERM_BP_FAT   | GO:0007517~muscle organ development                                                                     | 11  | 3.22  | 2.89  | 0.00486158 | 0.0797044  |
| SP_PIR_KEYWORDS | growth factor                                                                                           | 8   | 2.34  | 3.63  | 0.00669538 | 0.08148399 |
| SP_PIR_KEYWORDS | osteogenesis                                                                                            | 4   | 1.17  | 10.32 | 0.00647663 | 0.08235695 |
| GOTERM_BP_FAT   | GO:0042462~eye photoreceptor cell development                                                           | 4   | 1.17  | 11.09 | 0.00520598 | 0.08424204 |
| GOTERM_BP_FAT   | GO:0060349~bone morphogenesis                                                                           | 4   | 1.17  | 11.09 | 0.00520598 | 0.08424204 |
| SP_PIR_KEYWORDS | ectodermal dysplasia                                                                                    | 4   | 1.17  | 9.89  | 0.00731102 | 0.08512858 |
| GOTERM_BP_FAT   | GO:0051480~cytosolic calcium ion homeostasis                                                            | 8   | 2.34  | 3.76  | 0.00539638 | 0.0854379  |
| GOTERM_BP_FAT   | GO:0006928~cell motion                                                                                  | 18  | 5.26  | 2.10  | 0.00539402 | 0.0862702  |
| GOTERM_BP_FAT   | GO:0007507~heart development                                                                            | 11  | 3.22  | 2.84  | 0.00553757 | 0.08670683 |
| GOTERM_CC_FAT   | GO:0030424~axon                                                                                         | 9   | 2.63  | 3.29  | 0.00608178 | 0.0885561  |
| GOTERM_BP_FAT   | GO:0040007~growth                                                                                       | 10  | 2.92  | 3.03  | 0.00584798 | 0.09045402 |
| GOTERM_BP_FAT   | GO:0021532~neural tube patterning                                                                       | 4   | 1.17  | 10.56 | 0.005994   | 0.09171086 |
| GOTERM_BP_FAT   | GO:0001754~eye photoreceptor cell differentiation                                                       | 4   | 1.17  | 10.56 | 0.005994   | 0.09171086 |
| GOTERM_BP_FAT   | GO:0031328~positive regulation of cellular biosynthetic process                                         | 23  | 6.73  | 1.86  | 0.00605639 | 0.09173135 |
| GOTERM_BP_FAT   | GO:0010941~regulation of cell death                                                                     | 26  | 7.60  | 1.77  | 0.00622776 | 0.09331177 |
| SP_PIR_KEYWORDS | transmembrane                                                                                           | 104 | 30.41 | 1.24  | 0.00840779 | 0.09360533 |
| GOTERM_BP_FAT   | GO:0045941~positive regulation of transcription                                                         | 20  | 5.85  | 1.97  | 0.00639977 | 0.09486765 |
| GOTERM_BP_FAT   | GO:0007218~neuropeptide signaling pathway                                                               | 7   | 2.05  | 4.17  | 0.00655969 | 0.09622181 |
| SMART           | SM00353:HLH                                                                                             | 9   | 2.63  | 3.75  | 0.0026381  | 0.09630275 |

**Supplementary Table 7: Gene Set Enrichment Analysis of the MPNST Expression Profile between PRC2 loss and intact samples with FDR <0.001**

| NAME                                          | SIZE | ES   | NES  | NOM p-val | FDR q-val |
|-----------------------------------------------|------|------|------|-----------|-----------|
| MEISSNER_BRAIN_HCP_WITH_H3K27ME3              | 266  | 0.70 | 3.34 | 0         | 0         |
| MIKKELSEN_MCV6_HCP_WITH_H3K27ME3              | 428  | 0.65 | 3.26 | 0         | 0         |
| ORKIN_PRC_MODULE                              | 432  | 0.64 | 3.24 | 0         | 0         |
| MIKKELSEN_NPC_HCP_WITH_H3K27ME3               | 337  | 0.65 | 3.22 | 0         | 0         |
| NIKOLSKY_BREAST_CANCER_8Q12_Q22_AMPLICON      | 127  | 0.73 | 3.18 | 0         | 0         |
| DAVICIONI_MOLECULAR_ARMS_VS_ERMS_DN           | 179  | 0.69 | 3.17 | 0         | 0         |
| NIKOLSKY_BREAST_CANCER_8Q23_Q24_AMPLICON      | 153  | 0.71 | 3.13 | 0         | 0         |
| NAKAYAMA_SOFT_TISSUE_TUMORS_PCA1_DN           | 74   | 0.80 | 3.12 | 0         | 0         |
| MEISSNER_NPC_HCP_WITH_H3K4ME2_AND_H3K27ME3    | 343  | 0.64 | 3.12 | 0         | 0         |
| RICKMAN_HEAD_AND_NECK_CANCER_A                | 96   | 0.71 | 2.93 | 0         | 0         |
| ROSTY_CERVICAL_CANCER_PROLIFERATION_CLUSTER   | 139  | 0.66 | 2.91 | 0         | 0         |
| MEISSNER_NPC_HCP_WITH_H3K4ME3_AND_H3K27ME3    | 141  | 0.65 | 2.86 | 0         | 0         |
| KONG_E2F3_TARGETS                             | 97   | 0.67 | 2.78 | 0         | 0         |
| NAKAYAMA_SOFT_TISSUE_TUMORS_PCA2_UP           | 87   | 0.67 | 2.78 | 0         | 0         |
| MIKKELSEN_NPC_HCP_WITH_H3K4ME3_AND_H3K27ME3   | 209  | 0.60 | 2.77 | 0         | 0         |
| SOTIRIOU_BREAST_CANCER_GRADE_1_VS_3_UP        | 148  | 0.63 | 2.76 | 0         | 0         |
| DUTERTRE ESTRADIOL_RESPONSE_24HR_UP           | 321  | 0.57 | 2.75 | 0         | 0         |
| CROONQUIST_NRAS_SIGNALING_DN                  | 72   | 0.71 | 2.75 | 0         | 0         |
| CROONQUIST_IL6_DEPRIVATION_DN                 | 98   | 0.67 | 2.74 | 0         | 0         |
| CUI_TCF21_TARGETS_2_UP                        | 420  | 0.55 | 2.74 | 0         | 0         |
| MEISSNER_NPC_HCP_WITH_H3K4ME2                 | 487  | 0.54 | 2.73 | 0         | 0         |
| CORRE_MULTIPLE_MYELOMA_DN                     | 60   | 0.72 | 2.73 | 0         | 0         |
| MEISSNER_NPC_HCP_WITH_H3K27ME3                | 79   | 0.67 | 2.70 | 0         | 0         |
| ISHIDA_E2F_TARGETS                            | 52   | 0.73 | 2.69 | 0         | 0         |
| LEE_EARLY_T_LYMPHOCYTE_UP                     | 104  | 0.64 | 2.68 | 0         | 0         |
| WHITEFORD_PEDIATRIC_CANCER_MARKERS            | 116  | 0.63 | 2.67 | 0         | 0         |
| LI_WILMS_TUMOR                                | 27   | 0.84 | 2.66 | 0         | 0         |
| MARKEY_RB1_ACUTE_LOF_DN                       | 227  | 0.58 | 2.66 | 0         | 0         |
| AMUNDSON_GAMMA_RADIATION_RESPONSE             | 40   | 0.76 | 2.65 | 0         | 0         |
| KUNINGER_IGF1_VS_PDGFB_TARGETS_UP             | 82   | 0.66 | 2.64 | 0         | 0         |
| CHANG_CYCLING_GENES                           | 146  | 0.59 | 2.59 | 0         | 0         |
| JAEGER_METASTASIS_DN                          | 255  | 0.54 | 2.58 | 0         | 0         |
| KANG_DOXORUBICIN_RESISTANCE_UP                | 54   | 0.70 | 2.58 | 0         | 0         |
| MIKKELSEN_IPS_WITH_HCP_H3K27ME3               | 101  | 0.62 | 2.58 | 0         | 0         |
| DURAND_STROMA_MAX_UP                          | 294  | 0.53 | 2.58 | 0         | 0         |
| MISSIAGLIA_REGULATED_BY_METHYLATION_DN        | 119  | 0.60 | 2.55 | 0         | 0         |
| REACTOME_NCAM1_INTERACTIONS                   | 39   | 0.73 | 2.53 | 0         | 0         |
| ZHOU_CELL_CYCLE_GENES_IN_IR_RESPONSE_6HR      | 83   | 0.62 | 2.52 | 0         | 0         |
| GRAHAM_NORMAL QUIESCENT_VS_NORMAL_DIVIDING_DN | 87   | 0.62 | 2.52 | 0         | 0         |
| WHITFIELD_CELL_CYCLE_LITERATURE               | 44   | 0.69 | 2.52 | 0         | 0         |
| PLASARI_TGFB1_TARGETS_10HR_DN                 | 243  | 0.53 | 2.51 | 0         | 0         |
| SCHAEFFER_PROSTATE_DEVELOPMENT_48HR_DN        | 423  | 0.50 | 2.50 | 0         | 0         |
| WANG_MLL_TARGETS                              | 285  | 0.52 | 2.50 | 0         | 0         |
| FARMER_BREAST_CANCER_CLUSTER_2                | 33   | 0.74 | 2.50 | 0         | 0         |
| ZHOU_CELL_CYCLE_GENES_IN_IR_RESPONSE_24HR     | 125  | 0.58 | 2.49 | 0         | 0         |
| FRASOR_RESPONSE_TO_SERM_OR_FULVESTRANT_DN     | 50   | 0.68 | 2.48 | 0         | 0         |

|                                                         |     |      |      |   |          |
|---------------------------------------------------------|-----|------|------|---|----------|
| CATION_CHANNEL_ACTIVITY                                 | 118 | 0.58 | 2.47 | 0 | 0        |
| HOELZEL_NF1_TARGETS_DN                                  | 108 | 0.59 | 2.47 | 0 | 0        |
| CAHOY_NEURONAL                                          | 99  | 0.59 | 2.46 | 0 | 0        |
| SCHLESINGER_METHYLATED_DE_NOVO_IN_CANCER                | 86  | 0.61 | 2.46 | 0 | 0        |
| NIELSEN_GIST_AND_SYNOVIAL_SARCOMA_UP                    | 20  | 0.85 | 2.46 | 0 | 0        |
| BLUM_RESPONSE_TO_SALIRASIB_DN                           | 341 | 0.50 | 2.45 | 0 | 0        |
| NIELSEN_GIST_VS_SYNOVIAL_SARCOMA_UP                     | 19  | 0.83 | 2.45 | 0 | 0        |
| SKELETAL_DEVELOPMENT                                    | 102 | 0.58 | 2.44 | 0 | 0        |
| CHIANG_LIVER_CANCER_SUBCLASS_PROLIFERATION_UP           | 172 | 0.54 | 2.42 | 0 | 0        |
| GRAHAM_CML_DIVIDING_VS_NORMAL_QUIESCENT_UP              | 180 | 0.54 | 2.42 | 0 | 0        |
| REACTOME_COLLAGEN_FORMATION                             | 58  | 0.64 | 2.42 | 0 | 0        |
| SCHLESINGER_H3K27ME3_IN_NORMAL_AND_METHYLATED_IN_CANCER | 27  | 0.76 | 2.42 | 0 | 0        |
| RB_P107_DN.V1_UP                                        | 139 | 0.55 | 2.41 | 0 | 0        |
| VERNELL_RETINOBLASTOMA_PATHWAY_UP                       | 70  | 0.62 | 2.41 | 0 | 0        |
| MEL18_DN.V1_DN                                          | 144 | 0.55 | 2.39 | 0 | 0        |
| HATADA_METHYLATED_IN_LUNG_CANCER_UP                     | 384 | 0.48 | 2.38 | 0 | 0        |
| WONG_ENDMETRIUM_CANCER_DN                               | 81  | 0.59 | 2.38 | 0 | 0        |
| LY_AGING_MIDDLE_DN                                      | 16  | 0.85 | 2.36 | 0 | 0        |
| PID_WNT_SIGNALING_PATHWAY                               | 28  | 0.74 | 2.36 | 0 | 0        |
| MORI_LARGE_PRE_BII_LYMPHOCYTE_UP                        | 84  | 0.59 | 2.36 | 0 | 0        |
| ZHANG_TLX_TARGETS_60HR_DN                               | 275 | 0.50 | 2.36 | 0 | 0        |
| GSE19825_NAIVE_VS_DAY3_EFF_CD8_TCELL_UP                 | 197 | 0.52 | 2.35 | 0 | 0        |
| LE_EGR2_TARGETS_UP                                      | 108 | 0.55 | 2.35 | 0 | 0        |
| ZHAN_MULTIPLE_MYELOMA_PR_UP                             | 44  | 0.65 | 2.35 | 0 | 0        |
| KOBAYASHI_EGFR_SIGNALING_24HR_DN                        | 247 | 0.50 | 2.34 | 0 | 0        |
| NERVOUS_SYSTEM_DEVELOPMENT                              | 381 | 0.47 | 2.34 | 0 | 0        |
| REACTOME_STRIATED_MUSCLE_CONTRACTION                    | 27  | 0.74 | 2.34 | 0 | 0        |
| CAIRO_LIVER_DEVELOPMENT_UP                              | 164 | 0.52 | 2.32 | 0 | 1.42E-05 |
| KEGG_NEUROACTIVE_LIGAND_RECEPTOR_INTERACTION            | 271 | 0.49 | 2.33 | 0 | 1.44E-05 |
| MEISSNER_BRAIN_HCP_WITH_H3K4ME2_AND_H3K27ME3            | 57  | 0.63 | 2.33 | 0 | 1.46E-05 |
| STAEGE_EWING_FAMILY_TUMOR                               | 33  | 0.69 | 2.28 | 0 | 2.49E-05 |
| JAATINEN_HEMATOPOIETIC_STEM_CELL_UP                     | 305 | 0.47 | 2.28 | 0 | 2.52E-05 |
| LI_WILMS_TUMOR_VS_FETAL_KIDNEY_1_DN                     | 162 | 0.51 | 2.29 | 0 | 2.55E-05 |
| WONG_EMBRYONIC_STEM_CELL_CORE                           | 334 | 0.47 | 2.30 | 0 | 2.58E-05 |
| REACTOME_TRANSMISSION_ACROSS_CHEMICAL_SYNAPSES          | 184 | 0.51 | 2.30 | 0 | 2.61E-05 |
| SHEPARD_BMYB_MORPHOLINO_DN                              | 197 | 0.50 | 2.30 | 0 | 2.64E-05 |
| DAWSON_METHYLATED_IN_LYMPHOMA_TCL1                      | 59  | 0.61 | 2.30 | 0 | 2.67E-05 |
| BOQUEST_STEM_CELL_UP                                    | 260 | 0.48 | 2.30 | 0 | 2.71E-05 |
| GATED_CHANNEL_ACTIVITY                                  | 121 | 0.54 | 2.30 | 0 | 2.74E-05 |
| PRC2_EZH2_UP.V1_UP                                      | 187 | 0.51 | 2.31 | 0 | 2.78E-05 |
| LY_AGING_PREMATURE_DN                                   | 30  | 0.72 | 2.31 | 0 | 2.81E-05 |
| GSE13485_DAY7_VS_DAY21_YF17D_VACCINE_PBMC_DN            | 160 | 0.52 | 2.31 | 0 | 2.85E-05 |
| WU_APOPTOSIS_BY_CDKN1A_VIA_TP53                         | 55  | 0.61 | 2.27 | 0 | 5.74E-05 |
| DELYS_THYROID_CANCER_DN                                 | 230 | 0.48 | 2.27 | 0 | 5.80E-05 |
| BURTON_ADIPOGENESIS_3                                   | 101 | 0.55 | 2.27 | 0 | 5.86E-05 |
| EGUCHI_CELL_CYCLE_RB1_TARGETS                           | 23  | 0.74 | 2.27 | 0 | 5.92E-05 |
| SMID_BREAST_CANCER_RELAPSE_IN_BRAIN_UP                  | 39  | 0.65 | 2.27 | 0 | 5.99E-05 |
| GSE15750_DAY6_VS_DAY10_EFF_CD8_TCELL_UP                 | 198 | 0.49 | 2.27 | 0 | 6.06E-05 |
| NIKOLSKY_BREAST_CANCER_5P15_AMPLICON                    | 26  | 0.73 | 2.27 | 0 | 6.12E-05 |

|                                                               |     |      |      |   |          |
|---------------------------------------------------------------|-----|------|------|---|----------|
| CROONQUIST_NRAS_VS_STROMAL_STIMULATION_DN                     | 99  | 0.55 | 2.25 | 0 | 6.62E-05 |
| NIELSEN_MALIGNAT_FIBROUS_HISTIOCYTOMA_DN                      | 18  | 0.78 | 2.26 | 0 | 6.69E-05 |
| RHODES_UNDIFFERENTIATED_CANCER                                | 69  | 0.58 | 2.26 | 0 | 6.76E-05 |
| MORI_IMMATURE_B_LYMPHOCYTE_DN                                 | 90  | 0.55 | 2.27 | 0 | 6.83E-05 |
| REACTOME_NEURONAL_SYSTEM                                      | 276 | 0.47 | 2.24 | 0 | 7.36E-05 |
| ACEVEDO_FGFR1_TARGETS_IN_PROSTATE_CANCER_MODEL_D<br>N         | 301 | 0.46 | 2.24 | 0 | 7.43E-05 |
| BURTON_ADIPOGENESIS_PEAK_AT_24HR                              | 43  | 0.64 | 2.25 | 0 | 7.51E-05 |
| CONCANNON_APOPTOSIS_BY_EPOXOMICIN_DN                          | 164 | 0.50 | 2.25 | 0 | 7.58E-05 |
| METAL_ION_TRANSMEMBRANE_TRANSPORTER_ACTIVITY                  | 145 | 0.51 | 2.25 | 0 | 7.66E-05 |
| REN_ALVEOLAR_RHABDOMYOSARCOMA_UP                              | 98  | 0.53 | 2.24 | 0 | 8.12E-05 |
| SCHAEFFER_PROSTATE_DEVELOPMENT_12HR_DN                        | 56  | 0.60 | 2.24 | 0 | 8.20E-05 |
| RICKMAN_TUMOR_DIFFERENTIATED_WELL_VS_POORLY_UP                | 233 | 0.48 | 2.24 | 0 | 8.27E-05 |
| LE_NEURONAL_DIFFERENTIATION_DN                                | 19  | 0.77 | 2.24 | 0 | 8.35E-05 |
| KONDO_PROSTATE_CANCER_HCP_WITH_H3K27ME3                       | 95  | 0.54 | 2.23 | 0 | 8.96E-05 |
| TANG_SENESCENCE_TP53_TARGETS_DN                               | 57  | 0.59 | 2.23 | 0 | 9.04E-05 |
| SATO_SILENCED_BY_METHYLATION_IN_PANCREATIC_CANCER_<br>2       | 47  | 0.62 | 2.22 | 0 | 9.70E-05 |
| E2F3_UP.V1_UP                                                 | 182 | 0.49 | 2.23 | 0 | 9.79E-05 |
| VOLTAGE_GATED_CATION_CHANNEL_ACTIVITY                         | 66  | 0.58 | 2.23 | 0 | 9.88E-05 |
| WNT_SIGNALING                                                 | 89  | 0.54 | 2.22 | 0 | 1.06E-04 |
| GSE19825_NAIVE_VS_IL2RALOW_DAY3_EFF_CD8_TCELL_UP              | 196 | 0.48 | 2.21 | 0 | 1.24E-04 |
| SHEPARD_CRUSH_AND_BURN_MUTANT_DN                              | 180 | 0.49 | 2.21 | 0 | 1.42E-04 |
| ION_CHANNEL_ACTIVITY                                          | 147 | 0.50 | 2.20 | 0 | 1.57E-04 |
| GSE30962_PRIMARY_VS_SECONDARY_ACUTE_LCMV_INF_CD8_<br>TCELL_UP | 197 | 0.48 | 2.20 | 0 | 1.59E-04 |
| HADDAD_T_LYMPHOCYTE_AND_NK_PROGENITOR_UP                      | 77  | 0.55 | 2.20 | 0 | 1.67E-04 |
| BMI1_DN_MEL18_DN.V1_DN                                        | 143 | 0.50 | 2.20 | 0 | 1.68E-04 |
| VECCHI_GASTRIC_CANCER_EARLY_UP                                | 415 | 0.44 | 2.20 | 0 | 1.70E-04 |
| YAUCH_HEDGEHOG_SIGNALING_PARACRINE_DN                         | 257 | 0.46 | 2.20 | 0 | 1.71E-04 |
| RPS14_DN.V1_DN                                                | 183 | 0.48 | 2.20 | 0 | 1.73E-04 |
| KANG_AR_TARGETS_UP                                            | 17  | 0.78 | 2.20 | 0 | 1.74E-04 |
| OXFORD_RALA_OR_RALB_TARGETS_UP                                | 48  | 0.61 | 2.20 | 0 | 1.80E-04 |
| DAVICIONI_TARGETS_OF_PAX_FOXO1_FUSIONS_DN                     | 68  | 0.56 | 2.20 | 0 | 1.82E-04 |
| KEGG_CARDIAC_MUSCLE_CONTRACTION                               | 73  | 0.55 | 2.20 | 0 | 1.83E-04 |
| SUBSTRATE_SPECIFIC_CHANNEL_ACTIVITY                           | 154 | 0.49 | 2.19 | 0 | 1.96E-04 |
| MOLENAAR_TARGETS_OF_CCND1_AND_CDK4_DN                         | 56  | 0.59 | 2.19 | 0 | 2.02E-04 |
| GSE15750_DAY6_VS_DAY10_TRAF6KO_EFF_CD8_TCELL_UP               | 196 | 0.48 | 2.19 | 0 | 2.08E-04 |
| REACTOME_NCAM_SIGNALING_FOR_NEURITE_OUT_GROWTH                | 64  | 0.57 | 2.19 | 0 | 2.09E-04 |
| AMINE_RECEPTOR_ACTIVITY                                       | 34  | 0.65 | 2.19 | 0 | 2.22E-04 |
| POTASSIUM_CHANNEL_ACTIVITY                                    | 50  | 0.59 | 2.18 | 0 | 2.54E-04 |
| KRAS.600.LUNG.BREAST_UP.V1_DN                                 | 282 | 0.45 | 2.18 | 0 | 2.58E-04 |
| LIU_PROSTATE_CANCER_DN                                        | 469 | 0.43 | 2.18 | 0 | 2.60E-04 |
| LEE_TARGETS_OF_PTCH1_AND_SUFU_DN                              | 83  | 0.54 | 2.18 | 0 | 2.60E-04 |
| PETROVA_PROX1_TARGETS_UP                                      | 28  | 0.68 | 2.18 | 0 | 2.62E-04 |
| BRIDEAU_IMPRINTED_GENES                                       | 62  | 0.57 | 2.18 | 0 | 2.64E-04 |

|                                                  |     |      |      |          |          |
|--------------------------------------------------|-----|------|------|----------|----------|
| HANN_RESISTANCE_TO_BCL2_INHIBITOR_DN             | 47  | 0.61 | 2.17 | 0        | 2.65E-04 |
| ODONNELL_TARGETS_OF_MYC_AND_TFRC_DN              | 45  | 0.62 | 2.17 | 0        | 2.67E-04 |
| ESC_V6.5_UP_LATE.V1_UP                           | 188 | 0.48 | 2.17 | 0        | 2.68E-04 |
| WANG_LSD1_TARGETS_UP                             | 24  | 0.72 | 2.17 | 0        | 2.70E-04 |
| HOFFMANN_LARGE_TO_SMALL_PRE_BII_LYMPHOCYTE_UP    | 163 | 0.48 | 2.17 | 0        | 2.72E-04 |
| GSE15750_WT_VS_TRAF6KO_DAY10_EFF_CD8_TCELL_DN    | 197 | 0.47 | 2.17 | 0        | 2.72E-04 |
| KATSANOUELAVL1_TARGETS_DN                        | 147 | 0.49 | 2.17 | 0        | 2.74E-04 |
| ZHANG_TLX_TARGETS_UP                             | 89  | 0.54 | 2.17 | 0        | 2.74E-04 |
| KRAS.KIDNEY_UP.V1_UP                             | 141 | 0.49 | 2.16 | 0        | 2.76E-04 |
| REACTOME_NEUROTRANSMITTER_RECEPTOR_BINDING_AND_D |     |      |      |          |          |
| OWNSTREAM_TRANSMISSION_IN_THE_POSTSYNAPTIC_CELL  | 135 | 0.50 | 2.17 | 0        | 2.76E-04 |
| NIELSEN_SYNOVIAL_SARCOMA_UP                      | 18  | 0.75 | 2.16 | 0        | 2.77E-04 |
| REN_BOUND_BY_E2F                                 | 61  | 0.57 | 2.17 | 0        | 2.78E-04 |
| POTASSIUM_ION_TRANSPORT                          | 57  | 0.59 | 2.17 | 0        | 2.78E-04 |
| MIKKELSEN_ES_ICP_WITH_H3K27ME3                   | 41  | 0.62 | 2.16 | 0        | 2.79E-04 |
| PUJANA_BREAST_CANCER_WITH_BRCA1_MUTATED_UP       | 56  | 0.59 | 2.16 | 0        | 2.81E-04 |
| JACKSON_DNMT1_TARGETS_DN                         | 25  | 0.68 | 2.16 | 0        | 2.81E-04 |
| SCIANG_CELL_CYCLE_TARGETS_OF_TP53_AND_TP73_DN    | 22  | 0.72 | 2.16 | 0        | 2.83E-04 |
| VOLTAGE_GATED_POTASSIUM_CHANNEL_COMPLEX          | 40  | 0.63 | 2.16 | 0        | 2.93E-04 |
| BMI1_DN.V1_DN                                    | 140 | 0.49 | 2.16 | 0        | 2.94E-04 |
| PLASARI_NFIC_TARGETS_BASAL_UP                    | 27  | 0.67 | 2.16 | 0        | 2.96E-04 |
| SMITH_LIVER_CANCER                               | 45  | 0.61 | 2.16 | 0        | 2.98E-04 |
| LEE_NEURAL_CRESCENT_STEM_CELL_DN                 | 117 | 0.50 | 2.15 | 0        | 2.99E-04 |
| CHEMNITZ_RESPONSE_TO_PROSTAGLANDIN_E2_UP         | 141 | 0.49 | 2.15 | 0        | 3.04E-04 |
| VOLTAGE_GATED_CALCIIUM_CHANNEL_ACTIVITY          | 18  | 0.75 | 2.15 | 0.002227 | 3.22E-04 |
| REACTOME_ACETYLCHOLINE_BINDING_AND_DOWNSTREAM_E  |     |      |      |          |          |
| VENTS                                            | 15  | 0.79 | 2.15 | 0        | 3.32E-04 |
| GSE8515_IL1_VS_IL6_4H_STIM_JMAC_DN               | 193 | 0.47 | 2.15 | 0        | 3.34E-04 |
| KAMMINGA_EZH2_TARGETS                            | 41  | 0.63 | 2.15 | 0        | 3.36E-04 |
| RIZ_ERYTHROID_DIFFERENTIATION                    | 77  | 0.54 | 2.14 | 0        | 3.37E-04 |
| BEIER_GLIOMA_STEM_CELL_UP                        | 35  | 0.64 | 2.14 | 0        | 3.39E-04 |
| GSE13485_CTRL_VS_DAY21_YF17D_VACCINE_PBMC_DN     | 162 | 0.48 | 2.14 | 0        | 3.41E-04 |
| VOLTAGE_GATED_CHANNEL_ACTIVITY                   | 73  | 0.55 | 2.14 | 0        | 3.48E-04 |
| SONG_TARGETS_OF_IE86_CMV_PROTEIN                 | 60  | 0.57 | 2.13 | 0        | 3.69E-04 |
| MARKEY_RB1_CHRONIC_LOF_UP                        | 114 | 0.51 | 2.13 | 0        | 3.71E-04 |
| LY_AGING_OLD_DN                                  | 56  | 0.57 | 2.13 | 0        | 3.74E-04 |
| ESTABLISHMENT_AND_OR_MAINTENANCE_OF_CHROMATIN_A  |     |      |      |          |          |
| RCHITECTURE                                      | 77  | 0.53 | 2.13 | 0        | 3.76E-04 |
| PEREZ_TP63_TARGETS                               | 341 | 0.44 | 2.13 | 0        | 3.78E-04 |
| TSENG_ADIPOGENIC_POTENTIAL_DN                    | 46  | 0.60 | 2.13 | 0        | 3.86E-04 |
| REACTOME_G1_S_SPECIFIC_TRANSCRIPTION             | 18  | 0.75 | 2.13 | 0        | 3.96E-04 |
| WALLACE_JAK2_TARGETS_UP                          | 25  | 0.68 | 2.13 | 0        | 4.06E-04 |
| REACTOME_EXTRACELLULAR_MATRIX_ORGANIZATION       | 86  | 0.52 | 2.13 | 0        | 4.20E-04 |
| RUIZ_TNC_TARGETS_DN                              | 139 | 0.49 | 2.13 | 0        | 4.22E-04 |
| GHANDHI_DIRECT_IRRADIATION_DN                    | 33  | 0.64 | 2.13 | 0        | 4.27E-04 |
| RIZ_ERYTHROID_DIFFERENTIATION_CCNE1              | 40  | 0.61 | 2.13 | 0        | 4.29E-04 |
| GSE10325_MYELOID_VS_LUPUS_MYELOID_UP             | 194 | 0.46 | 2.12 | 0        | 4.81E-04 |
| KEGG_CALCIIUM_SIGNALING_PATHWAY                  | 176 | 0.48 | 2.12 | 0        | 4.84E-04 |
| SHEPARD_BMYB_TARGETS                             | 71  | 0.54 | 2.11 | 0        | 5.44E-04 |

|                                                         |     |      |      |   |          |
|---------------------------------------------------------|-----|------|------|---|----------|
| VART_KSHV_INFECTION_ANGIOGENIC_MARKERS_DN               | 137 | 0.49 | 2.11 | 0 | 5.47E-04 |
| RORIE_TARGETS_OF_EWSR1_FLI1_FUSION_DN                   | 28  | 0.66 | 2.11 | 0 | 5.50E-04 |
| FUJII_YBX1_TARGETS_DN                                   | 197 | 0.47 | 2.11 | 0 | 5.82E-04 |
| MODY_HIPPOCAMPUS_PRENATAL                               | 42  | 0.60 | 2.10 | 0 | 6.27E-04 |
| REICHERT_MITOSIS_LIN9_TARGETS                           | 28  | 0.65 | 2.10 | 0 | 6.30E-04 |
| HEART_DEVELOPMENT                                       | 37  | 0.62 | 2.10 | 0 | 6.33E-04 |
| KEGG_BASAL_CELL_CARCINOMA                               | 55  | 0.57 | 2.10 | 0 | 6.35E-04 |
| MEISSNER_BRAIN_HCP_WITH_H3K4ME2                         | 16  | 0.74 | 2.10 | 0 | 6.36E-04 |
| ZHAN_MULTIPLE_MYELOMA_MS_UP                             | 47  | 0.58 | 2.10 | 0 | 6.37E-04 |
| RIZ_ERYTHROID_DIFFERENTIATION_12HR                      | 43  | 0.59 | 2.10 | 0 | 6.37E-04 |
| ASTON_MAJOR_DEPRESSIVE_DISORDER_UP                      | 48  | 0.57 | 2.10 | 0 | 6.37E-04 |
| EXTRACELLULAR_MATRIX                                    | 99  | 0.50 | 2.10 | 0 | 6.38E-04 |
| METAL_ION_TRANSPORT                                     | 116 | 0.49 | 2.10 | 0 | 6.39E-04 |
| TORCHIA_TARGETS_OF_EWSR1_FLI1_FUSION_TOP20_UP           | 20  | 0.72 | 2.10 | 0 | 6.41E-04 |
| CALCIUM_CHANNEL_ACTIVITY                                | 33  | 0.63 | 2.09 | 0 | 6.61E-04 |
| SANSOM_APC_TARGETS_UP                                   | 123 | 0.49 | 2.09 | 0 | 6.79E-04 |
| REACTOME_FGFR_LIGAND_BINDING_AND_ACTIVATION             | 22  | 0.70 | 2.09 | 0 | 6.87E-04 |
| SENESE_HDAC1_TARGETS_DN                                 | 243 | 0.44 | 2.09 | 0 | 6.89E-04 |
| THEODOROU_MAMMARY_TUMORIGENESIS                         | 31  | 0.64 | 2.09 | 0 | 7.00E-04 |
| CATION_TRANSMEMBRANE_TRANSPORTER_ACTIVITY               | 211 | 0.46 | 2.09 | 0 | 7.02E-04 |
| PTEN_DN.V2_DN                                           | 141 | 0.48 | 2.09 | 0 | 7.04E-04 |
| AUXILIARY_TRANSPORT_PROTEIN_ACTIVITY                    | 25  | 0.67 | 2.08 | 0 | 7.66E-04 |
| PEREZ_TP53_AND_TP63_TARGETS                             | 199 | 0.45 | 2.08 | 0 | 8.04E-04 |
| BIOCARTA_ALK_PATHWAY                                    | 37  | 0.60 | 2.07 | 0 | 8.08E-04 |
| BRAIN_DEVELOPMENT                                       | 51  | 0.57 | 2.08 | 0 | 8.11E-04 |
| SYNAPTIC_TRANSMISSION                                   | 172 | 0.46 | 2.07 | 0 | 8.12E-04 |
| LIM_MAMMARY_LUMINAL_MATURE_DN                           | 98  | 0.49 | 2.07 | 0 | 8.20E-04 |
| BONCI_TARGETS_OF_MIR15A_AND_MIR16_1                     | 91  | 0.51 | 2.07 | 0 | 8.31E-04 |
| VOLTAGE_GATED_CALCIUM_CHANNEL_COMPLEX                   | 15  | 0.76 | 2.07 | 0 | 8.43E-04 |
| RIZ_ERYTHROID_DIFFERENTIATION_6HR                       | 40  | 0.60 | 2.07 | 0 | 8.49E-04 |
| RIZ_ERYTHROID_DIFFERENTIATION_HBZ                       | 41  | 0.59 | 2.07 | 0 | 8.65E-04 |
| KEGG_AXON_GUIDANCE                                      | 128 | 0.48 | 2.07 | 0 | 8.71E-04 |
| PID_FOXM1PATHWAY                                        | 40  | 0.59 | 2.06 | 0 | 9.37E-04 |
| KAUFFMANN_MELANOMA_RELAPSE_UP                           | 61  | 0.54 | 2.06 | 0 | 9.38E-04 |
| MIKKELSEN_ES_ICP_WITH_H3K4ME3_AND_H3K27ME3              | 135 | 0.47 | 2.06 | 0 | 9.49E-04 |
| TRANSMEMBRANE_RECEPTOR_PROTEIN_TYROSINE_KINASE_ACTIVITY | 43  | 0.57 | 2.06 | 0 | 9.54E-04 |
| PROTEINACEOUS_EXTRACELLULAR_MATRIX                      | 98  | 0.50 | 2.05 | 0 | 9.99E-04 |
| REGULATION_OF_NEUROTRANSMITTER_LEVELS                   | 24  | 0.67 | 2.05 | 0 | 1.00E-03 |
| AMINE_BINDING                                           | 23  | 0.68 | 2.05 | 0 | 0.001    |

**Supplementary Table 8: Primer sequences for human RT-PCR and ChIP**

| <b>RT-PCR Primer</b> | <b>Sequence</b>          |
|----------------------|--------------------------|
| CDX2 F               | CGGCAGCCAAGTGAAAACC      |
| CDX2 R               | CTCCGGATGGTGTAGTAGCG     |
| IGF2 F               | TCGCCGAACCAAAGTGGATT     |
| IGF2 R               | GGGGCAGAGATAGTGGGAGA     |
| TLX1 F               | AGGCGCTCAAAATGACCGAT     |
| TLX1 R               | ACAAGCCGTTACCTCCACTT     |
| PAX2 F               | CAGGAATGGTGCCTGGGAG      |
| PAX2 R               | TTAGTAAGGCGGGGTTGCTG     |
| ESX1 F               | AACTTACCGTGACCTCGCTG     |
| ESX1 R               | TCCGTGCCAACGTTGTTTTT     |
| POU4F1 F             | CGGTAGGACTTGGCTGTGAG     |
| POU4F1 R             | TGTTTTCGCCCAACATGCAG     |
| HMX2 F               | CAGCCTGTCCGTGTCCTC       |
| HMX2 R               | CTTGGGGGTACCCAGGCA       |
| FOXN4 F              | CGTACAGCTGTCTGATCGCC     |
| FOXN4 R              | GGAGCCGCTCATCTTGTTCT     |
| BCL11Av1E2 F         | ATGATGAACCAGACCACGGC     |
| BCL11Av1E2 R         | CGATTGGTGAAGGGGAAGGT     |
| WIF1 F               | CCAGCCGTCTAAACGGGAA      |
| WIF1 R               | CTGCCGGGAAAACCTCCTCG     |
| DSC3 F               | GCTGGTGAAGCCTGCAAAAA     |
| DSC3 R               | TCTGCAGACCTGAAGCACTC     |
| CDH8 F               | CCGAGAGGCATGAACGGAAT     |
| CDH8 R               | AAATTTCTCTTGTGGGGCCCTG   |
| RPL27 F              | CATGGGCAAGAAGAAGATCG     |
| RPL27 R              | TCCAAGGGGATATCCACAGA     |
| <b>ChIP Primer</b>   | <b>Sequence</b>          |
| IGF2 ChIP F          | GGGGCAGAGATAGTGGGAGA     |
| IGF2 ChIP R          | TCTGTTTTCTCTCCGTGCTGT    |
| TLX1 ChIP F          | GACCAGATCCTCAACAGCCC     |
| TLX1 ChIP R          | TATTCTCCGTCCTGGAGGC      |
| PAX2 ChIP F          | GGCTTGCAGAACAATGCCA      |
| PAX2 ChIP R          | TCTGGAGTTCTCCCTCCCTG     |
| ESX1 ChIP F          | CTTCCGTGCCAACGTTGTTT     |
| ESX1 ChIP R          | TTACCGTGACCTCGCTGATG     |
| HMX2 ChIP F          | CACCTTCCACCCAGATCACC     |
| HMX2 ChIP R          | CCTTGCCCGCATCTTCTTTG     |
| FOXN4 ChIP F         | TCAGAAATGCCACAAGCCCT     |
| FOXN4 ChIP R         | CAGTGTGTTGTGTGTTGCGGG    |
| WIF1 ChIP F          | AGAGGAGGACATAGGCAGGG     |
| WIF1 ChIP R          | GATGCTCACCAGGCAAGAGT     |
| CDH8 ChIP F          | GCCTGCCTGCCAAATGTAAC     |
| CDH8 ChIP R          | CCAATGAGATCCGTCAGGGG     |
| GAPDH ChIP F         | TACTAGCGGTTTTACGGGCG     |
| GAPDH ChIP R         | TCGAACAGGAGGAGCAGAGAGCGA |

## **Supplementary Note**

Biospecimens were collected during surgical resection from patients with pathologic diagnosis of malignant peripheral nerve sheath tumors or neurofibromas. Material was collected under IRB-approved protocols (IRB#06-107) at Memorial Sloan-Kettering Cancer Center (New York, NY). All patients provided informed consent. Pathologic diagnosis was confirmed by at least two pathologists using diagnostic formalin-fixed and paraffin-embedded (FFPE) sections to select cases with estimated tumor content of >70%. The majority of the tumors are collected from different patients. In some cases, more than one tumor was selected from the same patient and these tumors were resected from distinct anatomical locations in different surgeries.
